# Supplementary material
Source: PubMed Central journal article supplement (PMC3969612)
Supplement: NIHMS557904-supplement-1.pdf [file NIHMS557904-supplement-1.pdf]

# Genome-wide trans-ethnic meta-analysis reveals novel insights into the genetic architecture of type 2 diabetes susceptibility

DIAbetes Genetics Replication And Meta-analysis (DIAGRAM) Consortium, Asian Genetic Epidemiology Network Type 2 Diabetes (AGEN-T2D) Consortium, South Asian Type 2 Diabetes (SAT2D) Consortium, Mexican American Type 2 Diabetes (MAT2D) Consortium and Type 2 Diabetes Genetic Exploration by Next-generation sequencing in multi-Ethnic Samples (T2D-GENES) Consortium

## SUPPLEMENTARY INFORMATION

### Contents

|                       |    |
|-----------------------|----|
| Supplementary Figures | 1  |
| Supplementary Tables  | 5  |
| Supplementary Note    | 25 |

**Supplementary Figure 1. Manhattan plot of trans-ethnic “discovery” GWAS meta-analysis.** The trans-ethnic meta-analysis comprises 26,488 T2D cases and 83,964 controls from populations of European, East Asian, South Asian, and Mexican and Mexican American ancestry, imputed up to 2.5 million Phase II/III HapMap autosomal SNPs. Previously established T2D susceptibility loci are highlighted in red. Novel loci achieving nominal significance ( $p < 10^{-5}$ ) in the stage 1 meta-analysis, and genome-wide significance ( $p < 5 \times 10^{-8}$ ) after the addition of the “validation” meta-analysis of 21,491 cases and 55,647 controls of European ancestry, are highlighted in green. Loci achieving nominal significance in the discovery meta-analysis, but not achieving genome-wide significance after the addition of the validation meta-analysis are highlighted in yellow.

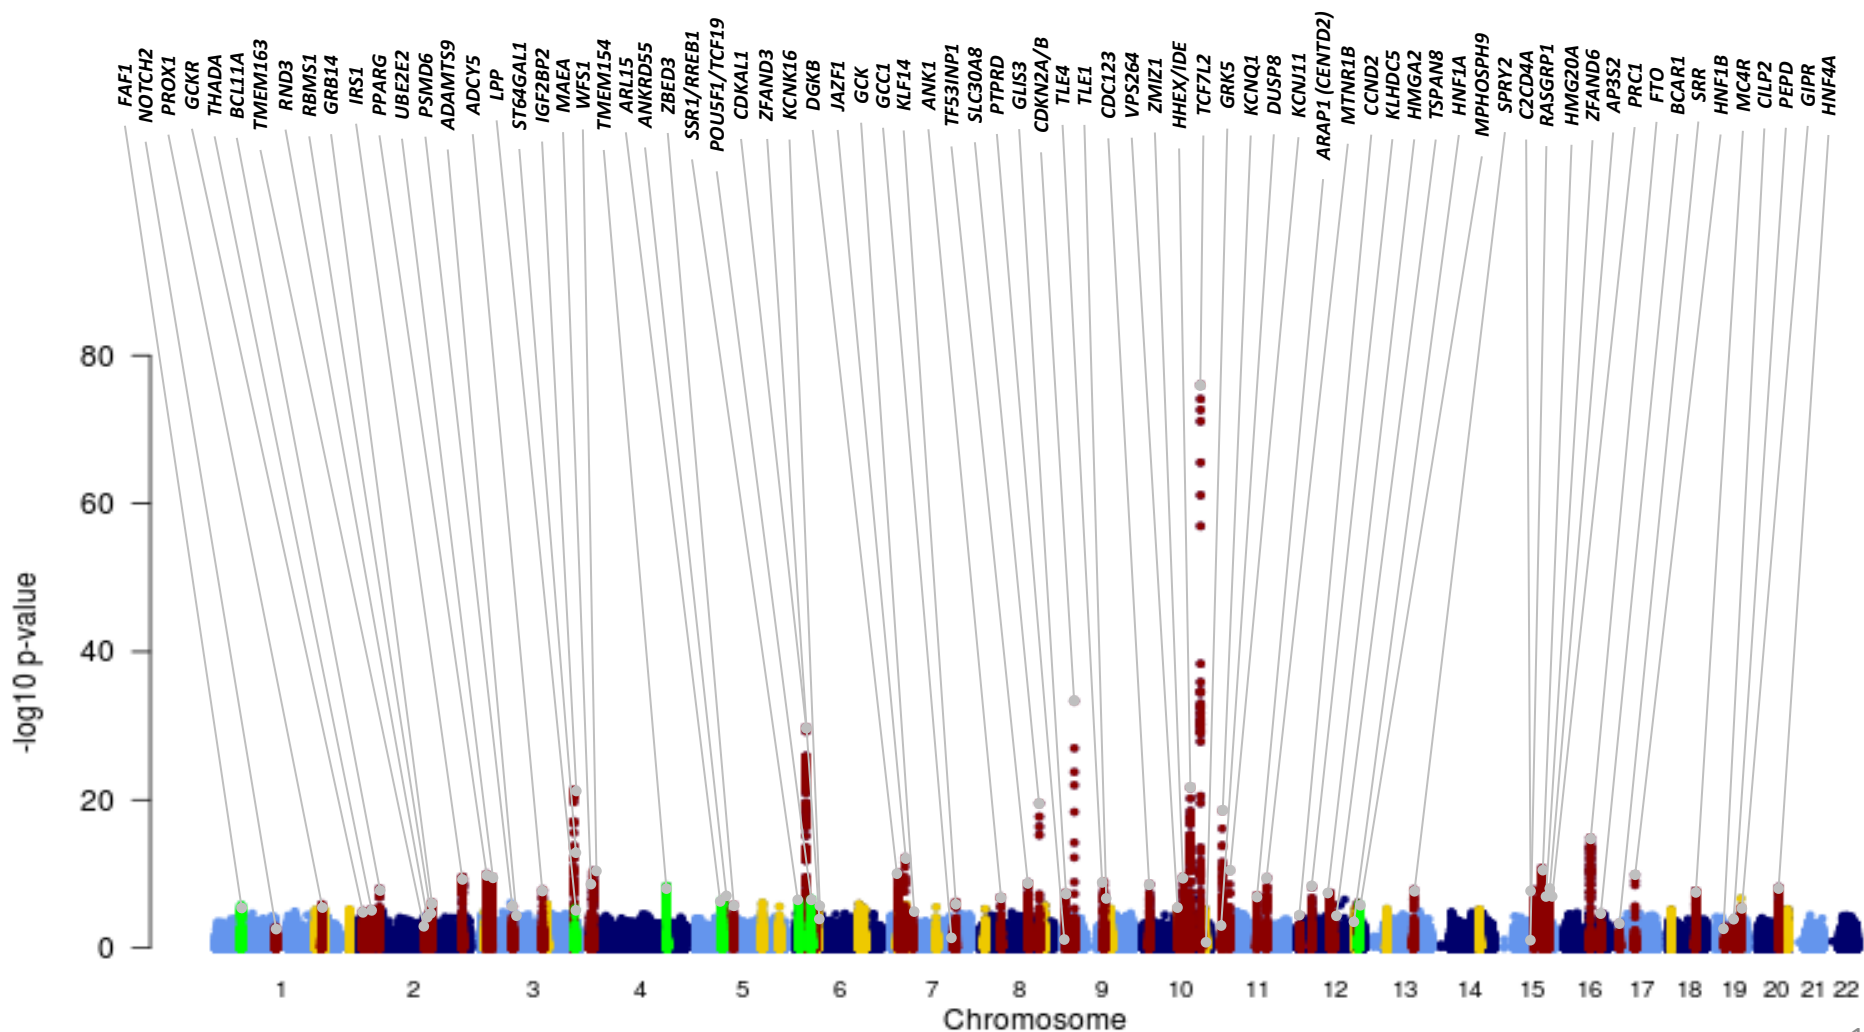

**Supplementary Figure 2. ENCODE annotation of *LPP* and *FAF1* loci.** Transcription factor binding ChIP sites (TFBS) and DNase I hypersensitivity sites (DNase HS) are highlighted in black. Chromatin states in 9 ENCODE cell lines (GM12878, HepG2, hESC, HMEC, HSMM, HUVEC, K562, NHEK, and NHLF) are highlighted as follows: strong enhancer (orange), weak enhancer (yellow), active promoter (red), poised promoter (pink), insulator (blue), transcribed (pale green), transcription transition (dark green), repressed (dark grey) and heterochromatin (pale grey).

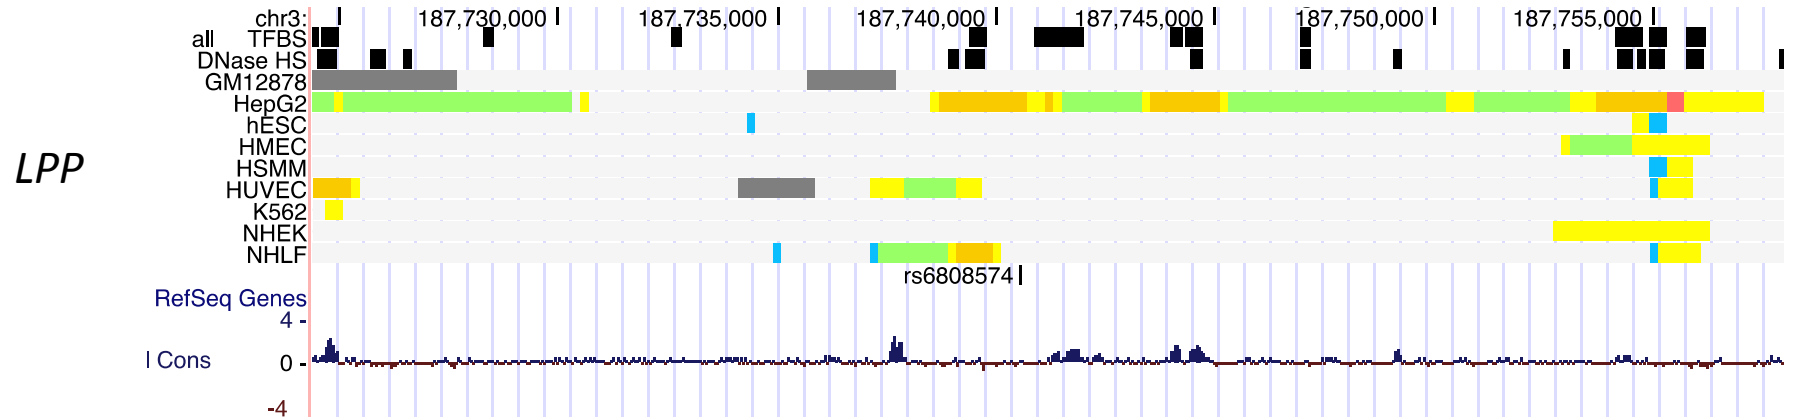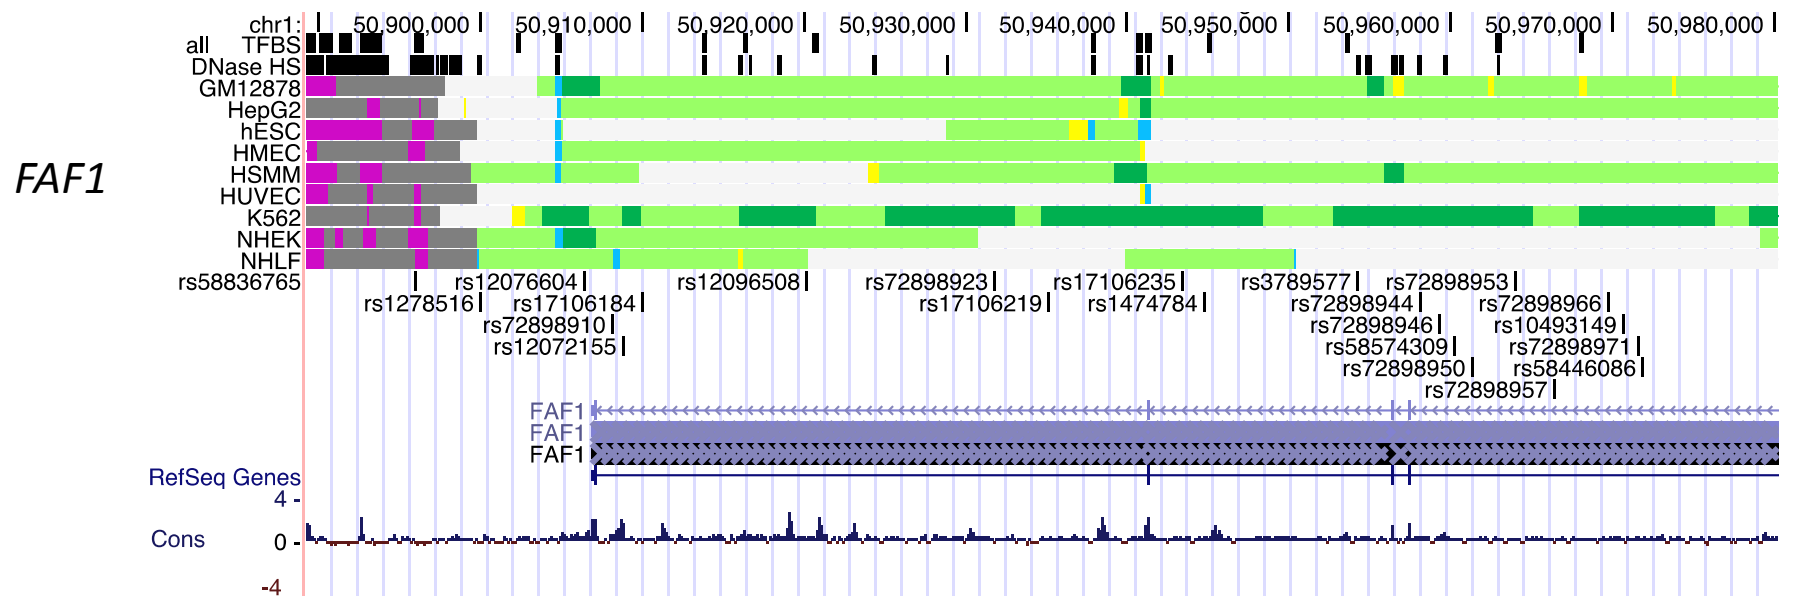

**Supplementary Figure 3. Signal plots constructed on the basis of ancestry-specific meta-analyses at two loci showing greatest improvements in fine-mapping resolution after trans-ethnic meta-analysis: *JAZF1* (top) and *SLC30A8* (bottom).** The ancestry-specific meta-analyses were imputed at up to 2.5 million Phase II/III HapMap autosomal SNPs. Each point represents a SNP passing quality control in the ancestry-specific meta-analysis, plotted with their  $p$ -value (on a  $-\log_{10}$  scale) as a function of genomic position (NCBI Build 36). In each plot, the lead SNP from the trans-ethnic meta-analysis across ancestry groups is represented by the purple symbol. The colour coding of all other SNPs indicates LD with the lead SNP (estimated by  $r^2$  from the most closely related reference panel from Phase II HapMap, i.e. CEU for the European, South Asian, and Mexican and Mexican American ancestry groups, and CHB+JPT for the East Asian ancestry group): red  $r^2 \geq 0.8$ ; gold  $0.6 \leq r^2 < 0.8$ ; green  $0.4 \leq r^2 < 0.6$ ; cyan  $0.2 \leq r^2 < 0.4$ ; blue  $r^2 < 0.2$ ; grey  $r^2$  unknown. The shape of the plotting symbol corresponds to the annotation of the SNP: upward triangle for frameshift or splice; downward triangle for non-synonymous; square for synonymous or UTR; and circle for intronic or non-coding. Recombination rates are estimated from Phase II HapMap and gene annotations are taken from the University of California Santa Cruz genome browser.

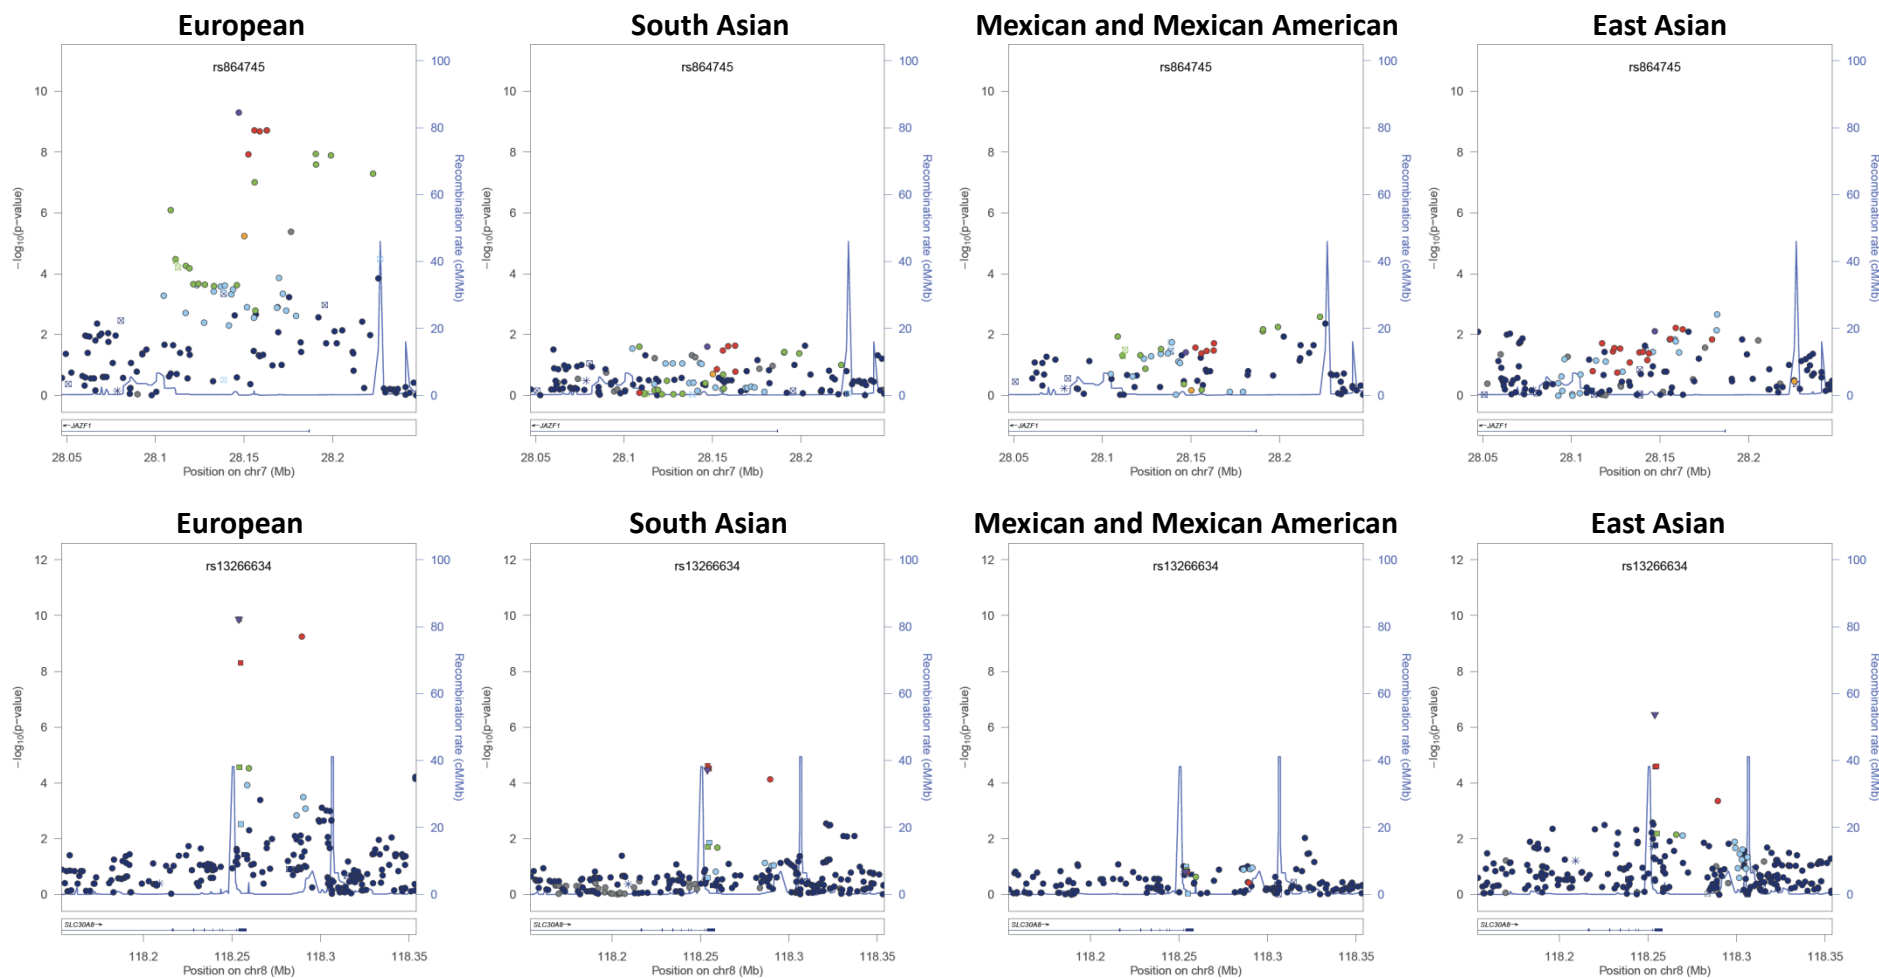

**Supplementary Figure 4. Dendrogram representing relatedness between ancestry groups included in the trans-ethnic meta-analysis.** The distance between each ethnic group is estimated by the genome-wide autosomal mean effect allele frequency difference from the ancestry-specific meta-analysis. The dendrogram represents our prior beliefs about the heterogeneity in allelic effects on T2D susceptibility between ancestry groups in the MANTRA analysis.

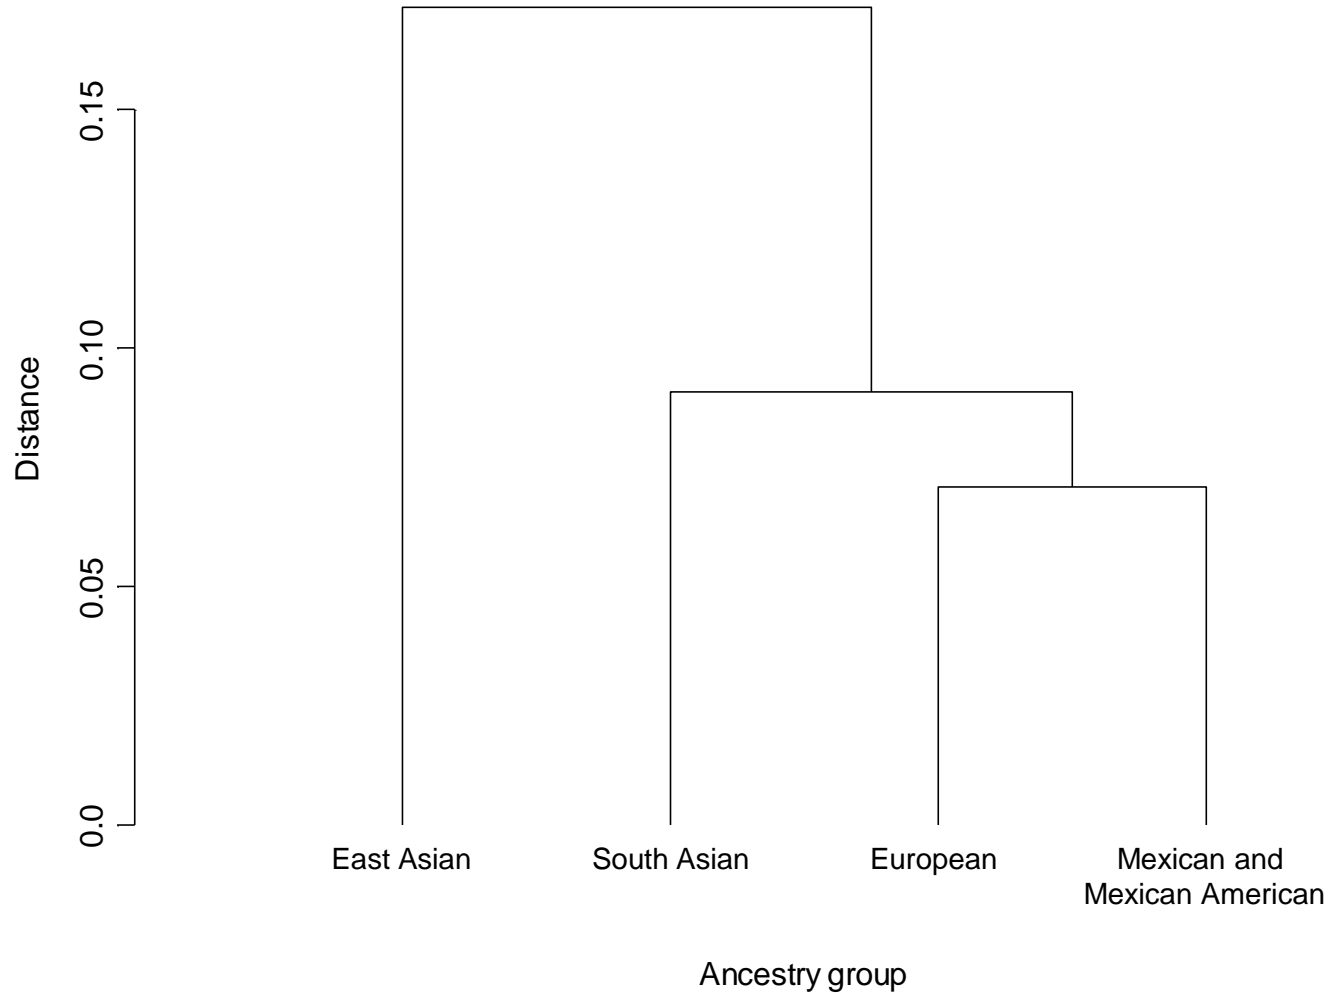

**Supplementary Table 1. Study sample characteristics and genotyping.**

**(a) Trans-ethnic meta-analysis.**

| Study       | Ethnic group (country of origin) | Case-control status | Sample characteristics      |                       |                                |                                    |                                    | Genotyping array                    |
|-------------|----------------------------------|---------------------|-----------------------------|-----------------------|--------------------------------|------------------------------------|------------------------------------|-------------------------------------|
|             |                                  |                     | Sample size (males/females) | Age (years) mean (SD) | Age at onset (years) mean (SD) | Fasting glucose (mmol/l) mean (SD) | BMI (kg/m <sup>2</sup> ) mean (SD) |                                     |
| ARIC        | European (USA)                   | Cases               | 775 (416/359)               | 56.1 (5.6)            | 50.9 (10.4)                    | 9.3 (3.6)                          | 30.4 (5.4)                         | Affymetrix Human SNP Array 6.0      |
|             |                                  | Controls            | 7,159 (3,167/3,992)         | 54.0 (5.7)            |                                | 5.4 (0.4)                          | 26.4 (4.5)                         |                                     |
| deCODE      | European (Iceland)               | Cases               | 1,465 (868/597)             | 68.4 (10.1)           | 55.1 (12.7)                    | 8.5 (2.7)                          | 30.1 (5.4)                         | Illumina Human 300K/370K            |
|             |                                  | Controls            | 23,194 (7,316/15,878)       | 59.7 (18.1)           |                                | 5.3 (0.7)                          | 26.8 (5.0)                         |                                     |
| DGDG        | European (France)                | Cases               | 679 (413/266)               | 59.5 (10.1)           | 45.1 (8.4)                     | 9.2 (3.1)                          | 25.9 (2.8)                         | Illumina Human 300K                 |
|             |                                  | Controls            | 697 (281/416)               | 53.9 (5.6)            |                                | 5.1 (0.4)                          | 23.2 (1.8)                         |                                     |
| DGI         | European (Sweden/Finland)        | Cases               | 1,022 (529/493)             | 65.9 (10.0)           | 58.0 (10.0)                    | 9.5 (3.1)                          | 28.1 (4.1)                         | Affymetrix GeneChip 500K            |
|             |                                  | Controls            | 1,075 (540/535)             | 58.0 (10.0)           |                                | 5.3 (0.5)                          | 27.6 (3.7)                         |                                     |
| EUROSPAN    | European (various isolates)      | Cases               | 269 (127/142)               | 62.9 (N/A)            | N/A                            | 8.0 (N/A)                          | 29.8 (N/A)                         | Illumina Human 300K/370K            |
|             |                                  | Controls            | 3,710 (1,557/2,153)         | 49.9 (N/A)            |                                | 4.8 (N/A)                          | 26.5 (N/A)                         |                                     |
| FHS         | European (USA)                   | Cases               | 674 (386/288)               | 63.7 (12.4)           | N/A                            | 8.6 (2.8)                          | 31.4 (6.5)                         | Affymetrix GeneChip 500K & MIPS 50K |
|             |                                  | Controls            | 7,664 (3,443/4,221)         | 52.3 (16.0)           |                                | 5.3 (0.5)                          | 27.0 (5.1)                         |                                     |
| FUSION      | European (Finland)               | Cases               | 1,161 (653/508)             | 62.9 (7.6)            | 53.7 (9.1)                     | 9.4 (3.1)                          | 30.2 (4.7)                         | Illumina Human 300K                 |
|             |                                  | Controls            | 1,174 (574/600)             | 63.6 (7.4)            |                                | 5.3 (0.5)                          | 27.1 (3.9)                         |                                     |
| HPFS        | European (USA)                   | Cases               | 1,124 (1,124/0)             | 55.0 (8.6)            | 64.0 (8.4)                     | N/A                                | 27.8 (4.0)                         | Affymetrix Human SNP Array 6.0      |
|             |                                  | Controls            | 1,298 (1,298/0)             | 55.0 (8.4)            |                                | N/A                                | 25.0 (2.9)                         |                                     |
| KORAGen     | European (Germany)               | Cases               | 433 (255/178)               | 65.2 (8.3)            | 58.2 (10.3)                    | N/A                                | 30.9 (5.0)                         | Affymetrix GeneChip 500K            |
|             |                                  | Controls            | 1,438 (693/745)             | 61.9 (7.4)            |                                | N/A                                | 27.7 (4.3)                         |                                     |
| NHS         | European (USA)                   | Cases               | 1,467 (0/1,467)             | 43.5 (6.7)            | 58.7 (10.6)                    | N/A                                | 27.4 (0.1)                         | Affymetrix Human SNP Array 6.0      |
|             |                                  | Controls            | 1,754 (0/1,754)             | 43.1 (6.8)            |                                | N/A                                | 23.5 (0.1)                         |                                     |
| RS1         | European (Netherlands)           | Cases               | 1,178 (488/690)             | 71.7 (8.9)            | 71.5 (8.9)                     | N/A                                | 27.4 (4.0)                         | Illumina Human 550K                 |
|             |                                  | Controls            | 4,761 (1,928/2,833)         | 69.0 (9.1)            |                                | N/A                                | 26.0 (3.6)                         |                                     |
| WTCCC       | European (UK)                    | Cases               | 1,924 (1,118/806)           | 58.6 (9.2)            | 50.3 (9.2)                     | N/A                                | 30.7 (6.1)                         | Affymetrix GeneChip 500K            |
|             |                                  | Controls            | 2,938 (1,446/1,492)         | N/A                   |                                | N/A                                | N/A                                |                                     |
| CAGE        | East Asian (Japan)               | Cases               | 931 (623/308)               | 66.1 (9.5)            | N/A                            | N/A                                | 24.4 (3.4)                         | Illumina Human 550K/610K            |
|             |                                  | Controls            | 1,404 (844/560)             | 65.9 (7.4)            |                                | N/A                                | 23.1 (3.0)                         |                                     |
| CLHNS       | East Asian (Philippines)         | Cases               | 159 (0/159)                 | 49.6 (6.1)            | N/A                            | 10.7 (3.5)                         | 25.9 (4.3)                         | Affymetrix GeneChip 500K            |
|             |                                  | Controls            | 1,624 (0/1,624)             | 48.3 (6.1)            |                                | 5.0 (0.6)                          | 24.4 (4.3)                         |                                     |
| KARE        | East Asian (Korea)               | Cases               | 1,042 (539/503)             | 56.4 (8.6)            | N/A                            | 7.0 (2.6)                          | 25.5 (3.3)                         | Affymetrix Human SNP Array 5.0      |
|             |                                  | Controls            | 2,943 (1,355/1,588)         | 51.5 (8.6)            |                                | 4.5 (0.4)                          | 24.1 (3.0)                         |                                     |
| SDCS/SP2(1) | East Asian (Singapore)           | Cases               | 1,082 (402/680)             | 65.1 (9.7)            | 55.7 (12.0)                    | N/A                                | 25.3 (3.9)                         | Illumina Human 610K                 |
|             |                                  | Controls            | 1,006 (217/789)             | 47.7 (11.1)           |                                | 4.7 (0.5)                          | 22.3 (3.7)                         |                                     |
| SDCS/SP(2)  | East Asian (Singapore)           | Cases               | 928 (602/326)               | 63.7 (10.8)           | 52.2 (14.4)                    | N/A                                | 25.4 (3.8)                         | Illumina Human 1M                   |
|             |                                  | Controls            | 939 (599/340)               | 46.7 (10.2)           |                                | 4.7 (0.5)                          | 22.8 (3.4)                         |                                     |
| SDGS        | East Asian                       | Cases               | 1,019 (0/1,019)             | 51.7 (6.7)            | 51.7 (6.7)                     | N/A                                | 26.5 (3.7)                         | Affymetrix Human SNP Array 6.0      |

|              |                         |          |                     |             |             |            |            |                                |
|--------------|-------------------------|----------|---------------------|-------------|-------------|------------|------------|--------------------------------|
|              | (China)                 | Controls | 1,710 (1,710/0)     | 48.7 (8.5)  |             | N/A        | 23.1 (3.3) |                                |
| SIMES        | East Asian (Singapore)  | Cases    | 794 (388/406)       | 62.3 (9.9)  | 54.4 (11.2) | N/A        | 27.8 (4.9) | Illumina Human 610K            |
|              |                         | Controls | 1,240 (595/645)     | 56.9 (11.4) |             | N/A        | 25.1 (4.8) |                                |
| TDS          | East Asian (China)      | Cases    | 999 (504/495)       | 59.2 (NA)   | 50.0 (N/A)  | N/A        | 23.8 (N/A) | Illumina Human 550K            |
|              |                         | Controls | 1,000 (502/498)     | 51.2 (NA)   |             | N/A        | 23.8 (N/A) |                                |
| LOLIPOP610   | South Asian (UK)        | Cases    | 1,783 (1,478/305)   | 59.4 (9.2)  | N/A         | 8.6 (3.1)  | 28.1 (4.6) | Illumina Human 610K            |
|              |                         | Controls | 4,773 (4,048/725)   | 53.9 (10.7) |             | 5.2 (0.6)  | 26.8 (4.2) |                                |
| LOLIPOP317   | South Asian (UK)        | Cases    | 440 (440/0)         | 54.1 (10.1) | N/A         | 8.9 (2.9)  | 27.6 (4.7) | Illumina Human 300K            |
|              |                         | Controls | 1,699 (1,699/0)     | 46.8 (10.1) |             | 5.1 (0.6)  | 26.6 (4.2) |                                |
| PROMIS       | South Asian (Pakistan)  | Cases    | 2,361 (1,806/555)   | 55.0 (9.4)  | N/A         | 13.3 (5.5) | 26.0 (4.0) | Illumina Human 650K            |
|              |                         | Controls | 6,817 (5,658/1,159) | 52.9 (10.5) |             | 6.9 (2.9)  | 25.3 (3.9) |                                |
| SINDI        | South Asian (Singapore) | Cases    | 977 (531/446)       | 60.7 (9.9)  | N/A         | 9.7 (4.4)  | 27.1 (5.1) | Illumina Human 610K            |
|              |                         | Controls | 1,169 (566/603)     | 55.7 (9.7)  |             | 5.4 (1.1)  | 25.3 (4.4) |                                |
| Mexico City  | Mexican (Mexico)        | Cases    | 967 (303/664)       | 50.5 (9.2)  | 43.7 (7.1)  | 10.2 (4.3) | 29.6 (4.8) | Affymetrix Human SNP Array 5.0 |
|              |                         | Controls | 343 (169/174)       | 50.7 (5.0)  |             | 4.8 (0.4)  | 27.4 (3.6) |                                |
| Starr County | Mexican American (USA)  | Cases    | 837 (333/504)       | 56.5 (11.8) | 46.7 (10.9) | 10.0 (4.1) | 31.8 (6.4) | Affymetrix Human SNP Array 6.0 |
|              |                         | Controls | 436 (137/299)       | 37.6 (9.0)  |             | 4.7 (0.5)  | 29.5 (6.5) |                                |

**(b) European ancestry “validation” meta-analysis.**

| Study          | Ethnic group (country of origin) | Case-control status | Sample characteristics      |                       |                                |                                    |                                    | Genotyping array |
|----------------|----------------------------------|---------------------|-----------------------------|-----------------------|--------------------------------|------------------------------------|------------------------------------|------------------|
|                |                                  |                     | Sample size (males/females) | Age (years) mean (SD) | Age at onset (years) mean (SD) | Fasting glucose (mmol/l) mean (SD) | BMI (kg/m <sup>2</sup> ) mean (SD) |                  |
| AMC-PAS        | European (Netherlands)           | Cases               | 48 (35/13)                  | 44.0 (4.7)            | N/A                            | 8.6 (3.2)                          | 29.3 (4.4)                         | Metabochip       |
|                |                                  | Controls            | 442 (333/109)               | 43.2 (5.3)            |                                | 5.3 (0.6)                          | 26.6 (4.1)                         |                  |
| BHS            | European (Australia)             | Cases               | 51 (38/13)                  | 72.3 (7.8)            | N/A                            | 7.8 (4.0)                          | 27.2 (3.9)                         | Metabochip       |
|                |                                  | Controls            | 359 (224/135)               | 70.0 (9.6)            |                                | 5.1 (0.9)                          | 26.6 (3.9)                         |                  |
| deCODE Stage 2 | European (Iceland)               | Cases               | 722 (433/289)               | 67.3 (13.6)           | N/A                            | N/A                                | 31.2 (6.3)                         | Metabochip       |
|                |                                  | Controls            | 10,153 (6,604/3,549)        | 44.3 (26.5)           |                                | N/A                                | N/A                                |                  |
| DILGOM         | European (Finland)               | Cases               | 541 (298/243)               | 60.5 (10.3)           | N/A                            | N/A                                | 30.1 (5.6)                         | Metabochip       |
|                |                                  | Controls            | 3,357 (1,480/1,877)         | 50.9 (13.5)           |                                | N/A                                | 26.5 (4.5)                         |                  |
| DUNDEE         | European (UK)                    | Cases               | 3,298 (1,940/1,358)         | 63.5 (9.6)            | 55.9 (8.9)                     | N/A                                | 31.9 (6.3)                         | Metabochip       |
|                |                                  | Controls            | 3,708 (1,918/1,790)         | 59.1 (11.3)           |                                | 4.9 (0.5)                          | 27.0 (4.5)                         |                  |
| EAS            | European (UK)                    | Cases               | 110 (64/46)                 | 64.0 (5.6)            | N/A                            | N/A                                | 25.9 (3.3)                         | Metabochip       |
|                |                                  | Controls            | 641 (301/340)               | 64.5 (5.6)            |                                | N/A                                | 25.5 (3.9)                         |                  |
| EGCUT          | European (Estonia)               | Cases               | 938 (342/596)               | 64.1 (10.5)           | N/A                            | N/A                                | 33.4 (5.4)                         | Metabochip       |
|                |                                  | Controls            | 915 (326/589)               | 51.7 (10.7)           |                                | N/A                                | 22.3 (2.5)                         |                  |
| EMIL-ULM       | European (Germany)               | Cases               | 755 (510/245)               | 48.7 (12.0)           | 45.5 (10.8)                    | N/A                                | 28.6 (7.1)                         | Metabochip       |
|                |                                  | Controls            | 1,632 (765/867)             | 45.1 (10.9)           |                                | N/A                                | 26.7 (5.0)                         |                  |
| EPIC           | European (UK)                    | Cases               | 727 (432/295)               | 61.8 (8.2)            | N/A                            | N/A                                | 29.5 (4.4)                         | Metabochip       |
|                |                                  | Controls            | 927 (393/534)               | 58.8 (9.4)            |                                | N/A                                | 26.1 (3.7)                         |                  |
| FUSION Stage 2 | European (Finland)               | Cases               | 1,037 (584/453)             | 59.7 (8.4)            | N/A                            | 7.7 (2.3)                          | 30.8 (5.4)                         | Metabochip       |
|                |                                  | Controls            | 1,157 (691/466)             | 59.0 (7.6)            |                                | 5.4 (0.4)                          | 26.9 (3.9)                         |                  |

|                 |                           |          |                     |             |             |           |            |            |
|-----------------|---------------------------|----------|---------------------|-------------|-------------|-----------|------------|------------|
| D2D2007         | European (Finland)        | Cases    | 454 (269/185)       | 63.4 (7.6)  | N/A         | 7.7 (1.8) | 30.6 (5.6) | MetaboChip |
|                 |                           | Controls | 1,229 (455/774)     | 58.1 (8.2)  |             | 5.6 (0.3) | 26.2 (4.3) |            |
| Dr's Extra      | European (Finland)        | Cases    | 110 (53/57)         | 68.4 (5.8)  | N/A         | 6.6 (0.8) | 30.9 (5.6) | MetaboChip |
|                 |                           | Controls | 785 (341/444)       | 66.0 (5.3)  |             | 5.4 (0.3) | 26.7 (4.0) |            |
| HUNT            | European (Norway)         | Cases    | 1,239 (628/611)     | 64.0 (12.9) | 61.9 (11.9) | N/A       | 29.2 (4.8) | MetaboChip |
|                 |                           | Controls | 1,375 (691/684)     | 63.5 (13.9) |             | N/A       | 26.5 (4.0) |            |
| METSIM          | European (Finland)        | Cases    | 1,169 (1,169/0)     | 60.5 (6.6)  | 57.0 (8.0)  | 7.5 (2.0) | 30.2 (5.2) | MetaboChip |
|                 |                           | Controls | 651 (651/0)         | 53.8 (5.0)  |             | 5.5 (0.3) | 25.9 (3.1) |            |
| GMetS           | European (France)         | Cases    | 507 (334/173)       | 55.9 (9.9)  | N/A         | N/A       | 28.5 (3.9) | MetaboChip |
|                 |                           | Controls | 2,553 (1,134/1,419) | 47.3 (11.1) |             | N/A       | 24.8 (3.8) |            |
| HNR             | European (Germany)        | Cases    | 520 (315/205)       | 62.6 (7.2)  | N/A         | N/A       | 30.4 (5.2) | MetaboChip |
|                 |                           | Controls | 3,932 (1,911/2,021) | 59.2 (7.8)  |             | N/A       | 27.5 (4.4) |            |
| IMPROVE         | European (Sweden)         | Cases    | 898 (513/385)       | 64.3 (5.6)  | N/A         | 7.7 (2.2) | 29.2 (4.6) | MetaboChip |
|                 |                           | Controls | 2,521 (1,134/1,387) | 64.2 (5.3)  |             | 5.3 (0.7) | 26.5 (3.9) |            |
| KORAGen Stage 2 | European (Germany)        | Cases    | 940 (504/436)       | 61.6 (10.0) | N/A         | N/A       | 30.8 (5.4) | MetaboChip |
|                 |                           | Controls | 4,209 (2,000/2,209) | 53.8 (13.2) |             | N/A       | 27.2 (4.6) |            |
| PIVUS           | European (Sweden)         | Cases    | 113 (70/43)         | 70.2 (0.2)  | N/A         | N/A       | 29.5 (5.1) | MetaboChip |
|                 |                           | Controls | 864 (419/445)       | 70.2 (0.2)  |             | N/A       | 26.8 (4.2) |            |
| PMB             | European (Sweden/Finland) | Cases    | 4,976 (2,911/2,065) | 58.8 (12.5) | N/A         | N/A       | 28.2 (8.7) | MetaboChip |
|                 |                           | Controls | 3,500 (1,700/1,800) | 58.3 (8.4)  |             | N/A       | 26.4 (4.4) |            |
| SCARFSHEEP      | European (Sweden)         | Cases    | 341 (246/95)        | 59.6 (7.0)  | N/A         | 8.12(5.4) | 27.4 (8.4) | MetaboChip |
|                 |                           | Controls | 3,073 (2,211/862)   | 57.9 (7.3)  |             | 4.0 (3.8) | 25.4 (6.1) |            |
| STR             | European (Sweden)         | Cases    | 320 (141/179)       | 71.5 (9.3)  | N/A         | N/A       | 27.0 (4.1) | MetaboChip |
|                 |                           | Controls | 1,318 (612/706)     | 74.3 (10.5) |             | N/A       | 24.9 (3.8) |            |
| THISEAS         | European (Greece)         | Cases    | 327 (229/98)        | 63.6 (10.6) | N/A         | 8.0 (2.6) | 29.4 (4.8) | MetaboChip |
|                 |                           | Controls | 1,180 (643/537)     | 58.2 (13.6) |             | 5.3 (0.6) | 28.3 (5.0) |            |
| ULSAM           | European (Sweden)         | Cases    | 233 (233/0)         | 71.0 (0.6)  | N/A         | N/A       | 27.7 (3.8) | MetaboChip |
|                 |                           | Controls | 942 (942/0)         | 71.0 (0.6)  |             | N/A       | 25.9 (3.2) |            |
| WARREN2         | European (UK)             | Cases    | 1,117 (647/470)     | N/A         | 45.5 (11.0) | N/A       | 32.2 (6.6) | MetaboChip |
|                 |                           | Controls | 4,224 (2,394/1,830) | N/A         |             | N/A       | N/A        |            |



**Supplementary Table 2. Summary of study-specific quality control, imputation and analysis.**

**(a) Trans-ethnic meta-analysis.**

| Study       | Ethnic group<br>(Country of origin) | Sample quality control |                                              | SNP quality control        |                    |       |                     |             | Imputation |                         | Analysis                           |                                 |                |
|-------------|-------------------------------------|------------------------|----------------------------------------------|----------------------------|--------------------|-------|---------------------|-------------|------------|-------------------------|------------------------------------|---------------------------------|----------------|
|             |                                     | Call rate              | Exclusions                                   | Call rate                  | HWE                | MAF   | Imputation          | Passed SNPs | Software   | Reference panel         | Software                           | Covariates                      | $\lambda_{GC}$ |
| ARIC        | European (USA)                      | ≥0.95                  | Relatedness and duplicates                   | ≥0.90                      | p>10 <sup>-6</sup> | ≥0.01 | r <sup>2</sup> >0.3 | 2,443,161   | MACH       | HapMap2 CEU             | ProbABEL                           | Age, sex, and study centre      | 1.01           |
| deCODE      | European (Iceland)                  | ≥0.98                  | Duplicates                                   | ≥0.96                      | p>10 <sup>-6</sup> | ≥0.01 | proper-info>0.5     | 2,338,113   | IMPUTE     | HapMap2 CEU             | SNPTEST                            | None                            | 1.31           |
| DGDG        | European (France)                   | ≥0.95                  | Duplicates                                   | ≥0.95                      | p>10 <sup>-4</sup> | ≥0.01 | proper-info>0.5     | 2,051,387   | IMPUTE     | HapMap2 CEU             | SNPTEST                            | None                            | 1.10           |
| DGI         | European (Sweden/Finland)           | ≥0.95                  | Duplicates                                   | ≥0.95                      | p>10 <sup>-6</sup> | ≥0.01 | proper-info>0.5     | 2,230,032   | IMPUTE     | HapMap2 CEU             | PLINK and SNPTEST                  | Age, sex, BMI, and study centre | 1.06           |
| EUROSPAN    | European (various isolates)         | ≥0.98                  | Duplicates                                   | ≥0.98                      | p>10 <sup>-6</sup> | ≥0.01 | r <sup>2</sup> >0.5 | 2,359,525   | MACH       | HapMap2 CEU             | GenABEL and SNPTEST                | Age and sex                     | 0.98           |
| FHS         | European (USA)                      | ≥0.95                  | Duplicates                                   | ≥0.95                      | p>10 <sup>-6</sup> | ≥0.01 | r <sup>2</sup> >0.3 | 2,389,929   | MACH       | HapMap2 CEU             | R (GEE correction for relatedness) | Age, sex, and cohort            | 1.02           |
| FUSION      | European (Finland)                  | ≥0.975                 | Duplicates                                   | ≥0.90                      | p>10 <sup>-6</sup> | ≥0.01 | r <sup>2</sup> >0.3 | 2,413,085   | MACH       | HapMap2 CEU             | MACH2DAT                           | Age, sex, and birth province    | 1.04           |
| HPFS        | European (USA)                      | ≥0.95                  | Relatedness and duplicates                   | ≥0.95                      | p>10 <sup>-6</sup> | ≥0.01 | N/A                 | 622,575     | N/A        | N/A                     | PLINK                              | Age and BMI                     | 1.03           |
| KORAGen     | European (Germany)                  | ≥0.93                  | Duplicates                                   | ≥0.95                      | p>10 <sup>-6</sup> | ≥0.01 | proper-info>0.5     | 2,325,232   | IMPUTE     | HapMap2 CEU             | SNPTEST                            | Age and sex                     | 1.04           |
| NHS         | European (USA)                      | ≥0.98                  | Relatedness and duplicates                   | ≥0.98                      | p>10 <sup>-6</sup> | ≥0.02 | N/A                 | 615,391     | N/A        | N/A                     | PLINK                              | Age and BMI                     | 0.98           |
| RS1         | European (Netherlands)              | ≥0.975                 | Duplicates                                   | ≥0.98                      | p>10 <sup>-6</sup> | ≥0.01 | r <sup>2</sup> >0.5 | 2,439,672   | MACH       | HapMap2 CEU             | GenABEL and SNPTEST                | None                            | 1.01           |
| WTCCC       | European (UK)                       | ≥0.97                  | Duplicates                                   | ≥0.95 (≥0.99 for MAF<0.05) | p>10 <sup>-3</sup> | ≥0.01 | proper-info>0.5     | 2,308,535   | IMPUTE     | HapMap2 CEU             | PLINK and SNPTEST                  | None                            | 1.08           |
| CAGE        | East Asian (Japan)                  | ≥0.90                  | Relatedness, duplicates and ethnic outliers  | ≥0.95                      | p>10 <sup>-6</sup> | ≥0.01 | r <sup>2</sup> >0.3 | 1,988,685   | IMPUTE     | HapMap2 CHB+JPT         | PLINK                              | Sex and BMI                     | 1.06           |
| CLHNS       | East Asian (Philippines)            | ≥0.97                  | Duplicates                                   | ≥0.90                      | p>10 <sup>-6</sup> | ≥0.01 | r <sup>2</sup> >0.3 | 2,049,920   | MACH       | HapMap2 CHB+JPT+CEU     | MACH2DAT                           | BMI and PCs                     | 1.01           |
| KARE        | East Asian (Korea)                  | ≥0.98                  | Relatedness, duplicates and ethnic outliers  | ≥0.95                      | p>10 <sup>-6</sup> | ≥0.01 | proper-info>0.5     | 1,419,177   | IMPUTE     | HapMap2 CHB+JPT         | PLINK                              | Sex, BMI and study centre       | 1.01           |
| SDCS/SP2(1) | East Asian (Singapore)              | ≥0.95                  | Relatedness, duplicates and ethnic outliers  | ≥0.95                      | p>10 <sup>-6</sup> | N/A   | proper-info>0.5     | 1,965,414   | IMPUTE     | HapMap2 CHB+JPT         | SNPTEST                            | Sex and BMI                     | 1.05           |
| SDCS/SP2(2) | East Asian (Singapore)              | ≥0.95                  | Relatedness, duplicates and ethnic outliers  | ≥0.95                      | p>10 <sup>-6</sup> | N/A   | proper-info>0.5     | 2,248,003   | IMPUTE     | HapMap2 CHB+JPT         | SNPTEST                            | Sex and BMI                     | 1.06           |
| SDGS        | East Asian (China)                  | ≥0.95                  | Relatedness and duplicates                   | ≥0.95                      | p>10 <sup>-5</sup> | ≥0.05 | r <sup>2</sup> >0.3 | 2,241,970   | MACH       | HapMap2 CHB+JPT         | MACH2DAT, PLINK                    | BMI                             | 1.04           |
| SiMES       | East Asian (Singapore)              | ≥0.95                  | Relatedness, duplicates and ethnic outliers  | ≥0.95                      | p>10 <sup>-6</sup> | N/A   | proper-info>0.5     | 1,625,733   | IMPUTE     | HapMap2 CHB+JPT+CEU+YRI | SNPTEST                            | Sex, BMI and PCs                | 1.04           |
| TDS         | East Asian (China)                  | N/A                    | N/A                                          | ≥0.95                      | p>10 <sup>-6</sup> | ≥0.05 | r <sup>2</sup> >0.3 | 1,890,143   | MACH       | HapMap2 CHB+JPT         | SAS                                | Sex and BMI                     | 1.04           |
| LOLIPOP610  | South Asian (UK)                    | ≥0.95                  | Relatedness, duplicates, and ethnic outliers | ≥0.95                      | p>10 <sup>-6</sup> | ≥0.01 | r <sup>2</sup> >0.3 | 2,220,688   | MACH       | HapMap2 CHB+JPT+CEU+YRI | MACH2DAT, PLINK                    | Study centre, CHD, and PCs      | 1.02           |
| LOLIPOP317  | South Asian                         | ≥0.95                  | Relatedness, duplicates,                     | ≥0.95                      | p>10 <sup>-6</sup> | ≥0.01 | r <sup>2</sup> >0.3 | 1,950,903   | MACH       | HapMap2                 | MACH2DAT, PLINK                    | PCs                             | 1.01           |

|              |                         |       |                                              |       |                   |       |                 |           |        |                               |            |                   |      |
|--------------|-------------------------|-------|----------------------------------------------|-------|-------------------|-------|-----------------|-----------|--------|-------------------------------|------------|-------------------|------|
|              | (UK)                    |       | and ethnic outliers                          |       |                   |       |                 |           |        | CHB+JPT+CEU+YRI               |            |                   |      |
| PROMIS       | South Asian (Pakistan)  | ≥0.95 | Relatedness                                  | ≥0.97 | p>10-6            | ≥0.01 | proper-info>0.4 | 2,527,357 | IMPUTE | HapMap2&3 CEU+GIH             | SNPTEST v2 | PCs               | 1.01 |
| SINDI        | South Asian (Singapore) | ≥0.95 | Relatedness, duplicates, and ethnic outliers | ≥0.95 | p>10-6            | ≥0.01 | proper-info>0.3 | 2,035,725 | IMPUTE | HapMap2 CHB+JPT+CEU+YRI       | SNPTEST    | PCs               | 1.03 |
| Mexico City  | Mexican (Mexico)        | ≥0.95 | Relatedness and duplicates                   | ≥0.95 | p>10-4 (controls) | ≥0.05 | proper-info>0.5 | 1,829,070 | IMPUTE | HapMap2&3 CHB+JPT+CEU+YRI+MXL | SNPTEST    | Age, sex, and PCs | 1.03 |
| Starr County | Mexican American (USA)  | ≥0.90 | Relatedness and duplicates                   | ≥0.90 | None              | ≥0.05 | r2 >0.7         | 1,782,420 | MACH   | HapMap2 CHB+JPT+CEU+YRI       | SNPTEST    | Age and sex       | 1.03 |

**(b) European ancestry “validation” meta-analysis.**

| Study           | Ethnic group (Country of origin) | Sample quality control |                                 | SNP quality control        |            |       |            | Imputation  |          |                 | Analysis |                              |                |
|-----------------|----------------------------------|------------------------|---------------------------------|----------------------------|------------|-------|------------|-------------|----------|-----------------|----------|------------------------------|----------------|
|                 |                                  | Call rate              | Exclusions                      | Call rate                  | HWE        | MAF   | Imputation | Passed SNPs | Software | Reference panel | Software | Covariates                   | $\lambda_{QT}$ |
| AMC-PAS         | European (Netherlands)           | ≥0.95                  | Duplicates and ethnic outliers  | ≥0.98                      | p>10-4     | ≥0.01 | N/A        | 109,525     | N/A      | N/A             | PLINK    | Age and sex                  | 1.00           |
| BHS             | European (Australia)             | ≥0.95                  | Relatedness                     | ≥0.95                      | p>10-6     | ≥0.01 | N/A        | 119,893     | N/A      | N/A             | PLINK    | Age and sex                  | 0.96           |
| deCODE Stage 2  | European (Iceland)               | N/A                    | N/A                             | N/A                        | N/A        | ≥0.01 | N/A        | 125,236     | N/A      | N/A             | SNPTEST  | Sex                          | 0.95           |
| DILGOM          | European (Finland)               | ≥0.95                  | Relatedness                     | ≥0.95                      | p>10-6     | ≥0.01 | N/A        | 116,634     | N/A      | N/A             | PLINK    | Age, sex, and PCs            | 0.93           |
| DUNDEE          | European (UK)                    | ≥0.95                  | Duplicates and ethnic outliers  | ≥0.95 (≥0.99 for MAF<0.05) | p>5.7x10-7 | ≥0.01 | N/A        | 121,365     | N/A      | N/A             | PLINK    | PCs                          | 1.07           |
| EAS             | European (UK)                    | ≥0.95                  |                                 | ≥0.95                      | p>10-6     | ≥0.01 | N/A        | 119,523     | N/A      | N/A             | PLINK    | Age and sex                  | 1.00           |
| EGCUT           | European (Estonia)               | ≥0.95                  | Relatedness and ethnic outliers | ≥0.95                      | p>10-6     | ≥0.01 | N/A        | 120,720     | N/A      | N/A             | SNPTEST  | Age, sex, and PCs            | 1.00           |
| EMIL-ULM        | European (Germany)               | ≥0.95                  | Relatedness                     | ≥0.95                      | p>10-6     | ≥0.01 | N/A        | 121,684     | N/A      | N/A             | PLINK    | Age and sex                  | 1.14           |
| EPIC            | European (UK)                    | ≥0.95                  | Duplicates                      | ≥0.90                      | p>10-6     | ≥0.01 | N/A        | 120,527     | N/A      | N/A             | PLINK    | Age and sex                  | 0.97           |
| FUSION Stage 2  | European (Finland)               | ≥0.98                  | Relatedness                     | ≥0.98                      | p>10-5     | ≥0.01 | N/A        | 123,853     | N/A      | N/A             | PLINK    | Age and sex                  | 0.97           |
| D2D2007         | European (Finland)               | ≥0.98                  | Relatedness                     | ≥0.98                      | p>10-5     | ≥0.01 | N/A        | 123,461     | N/A      | N/A             | PLINK    | Age and sex                  | 0.96           |
| Dr’s Extra      | European (Finland)               | ≥0.98                  | Relatedness                     | ≥0.98                      | p>10-5     | ≥0.01 | N/A        | 120,746     | N/A      | N/A             | PLINK    | Age and sex                  | 0.94           |
| HUNT            | European (Norway)                | ≥0.98                  | Relatedness                     | ≥0.98                      | p>10-5     | ≥0.01 | N/A        | 125,644     | N/A      | N/A             | PLINK    | Age, sex and collection site | 1.10           |
| METSIM          | European (Finland)               | ≥0.98                  | Relatedness                     | ≥0.98                      | p>10-5     | ≥0.01 | N/A        | 122,600     | N/A      | N/A             | PLINK    | Age                          | 1.01           |
| GMetS           | European (France)                | ≥0.95                  | Duplicates                      | ≥0.95                      | p>10-4     | ≥0.01 | N/A        | 123,359     | N/A      | N/A             | PLINK    | Age, sex, and BMI            | 1.11           |
| HNR             | European (Germany)               | ≥0.97                  | Relatedness and ethnic outliers | ≥0.95                      | p>10-6     | ≥0.01 | N/A        | 126,675     | N/A      | N/A             | PLINK    | Age and sex                  | 1.00           |
| IMPROVE         | European (Sweden)                | ≥0.95                  | Relatedness and ethnic outliers | ≥0.95                      | p>10-6     | ≥0.01 | N/A        | 122,320     | N/A      | N/A             | PLINK    | Age, sex, and PCs            | 1.13           |
| KORAGen Stage 2 | European                         | ≥0.95                  | Relatedness                     | ≥0.95                      | p>10-6     | ≥0.01 | N/A        | 120,547     | N/A      | N/A             | PLINK    | Age and sex                  | 1.02           |

|            |                           |       |                                 |       |        |       |     |         |     |     |       |                       |      |
|------------|---------------------------|-------|---------------------------------|-------|--------|-------|-----|---------|-----|-----|-------|-----------------------|------|
|            | (Germany)                 |       |                                 |       |        |       |     |         |     |     |       |                       |      |
| PIVUS      | European (Sweden)         | ≥0.95 | Relatedness                     | ≥0.95 | p>10-6 | ≥0.01 | N/A | 120,892 | N/A | N/A | PLINK | Age and sex           | 0.97 |
| PMB        | European (Sweden/Finland) | ≥0.95 | Relatedness and ethnic outliers | ≥0.95 | p>10-6 | ≥0.01 | N/A | 119,674 | N/A | N/A | PLINK | PCs                   | 1.05 |
| SCARFSHEEP | European (Sweden)         | ≥0.95 | Relatedness                     | ≥0.95 | p>10-6 | ≥0.01 | N/A | 121,792 | N/A | N/A | PLINK | Age, sex, PCs, and MI | 1.00 |
| STR        | European (Sweden)         | ≥0.95 | Relatedness                     | ≥0.95 | p>10-6 | ≥0.01 | N/A | 119,375 | N/A | N/A | PLINK | Age, sex, PCs and CAD | 0.98 |
| THISEAS    | European (Greece)         | ≥0.95 | N/A                             | ≥0.95 | p>10-6 | ≥0.01 | N/A | 120,509 | N/A | N/A | PLINK | Age and sex           | 0.99 |
| ULSAM      | European (Sweden)         | ≥0.95 | Duplicates and ethnic outliers  | ≥0.98 | p>10-4 | ≥0.01 | N/A | 108,868 | N/A | N/A | PLINK | Age                   | 1.00 |
| WARREN2    | European (UK)             | ≥0.95 | Relatedness                     | ≥0.95 | p>10-6 | ≥0.01 | N/A | 119,018 | N/A | N/A | PLINK | Age and sex           | 0.95 |

**Supplementary Table 3. Association summary statistics in each ancestry group (European, East Asian, South Asian, and Mexican and Mexican American) for previously reported lead SNPs at established autosomal T2D susceptibility loci and assessment of heterogeneity in allelic effects after fixed-effects trans-ethnic GWAS meta-analysis of 26,488 cases and 83,964 controls.**

| Locus          | Lead SNP   | Chr | Build 36 position (bp) | Alleles |       | European<br>12,171 cases and 56,862 controls |                  |         | East Asian<br>6,952 cases and 11,865 controls |                  |         | South Asian<br>5,561 cases and 14,458 controls |                  |         | Mexican and Mexican American<br>1,804 cases and 779 controls |                  |         | Trans-ethnic<br>meta-analysis |             |
|----------------|------------|-----|------------------------|---------|-------|----------------------------------------------|------------------|---------|-----------------------------------------------|------------------|---------|------------------------------------------------|------------------|---------|--------------------------------------------------------------|------------------|---------|-------------------------------|-------------|
|                |            |     |                        | Risk    | Other | RAF                                          | OR (95% CI)      | p-value | RAF                                           | OR (95% CI)      | p-value | RAF                                            | OR (95% CI)      | p-value | RAF                                                          | OR (95% CI)      | p-value | p-value                       | Cochran's Q |
| TCF7L2         | rs7903146  | 10  | 114,748,339            | T       | C     | 0.30                                         | 1.40 (1.35-1.46) | 1.9E-59 | 0.05                                          | 1.18 (1.03-1.35) | 1.6E-02 | 0.31                                           | 1.25 (1.19-1.32) | 3.6E-19 | 0.23                                                         | 1.16 (0.97-1.38) | 1.1E-01 | 7.8E-75                       | 5.5E-04     |
| PEPD           | rs3786897  | 19  | 38,584,848             | A       | G     | 0.57                                         | 1.02 (0.98-1.06) | 3.3E-01 | 0.40                                          | 1.17 (1.10-1.24) | 3.5E-07 | 0.72                                           | 1.04 (0.99-1.10) | 1.5E-01 | 0.74                                                         | 0.90 (0.76-1.07) | 2.3E-01 | 3.3E-04                       | 5.5E-04     |
| KLF14          | rs13233731 | 7   | 130,088,229            | G       | A     | 0.49                                         | 1.10 (1.06-1.13) | 1.7E-07 | 0.68                                          | 0.99 (0.94-1.04) | 6.5E-01 | 0.61                                           | 0.99 (0.94-1.04) | 6.1E-01 | 0.61                                                         | 1.07 (0.93-1.23) | 3.4E-01 | 7.0E-04                       | 6.4E-04     |
| CDKAL1         | rs7756992  | 6   | 20,787,688             | G       | A     | 0.26                                         | 1.20 (1.16-1.25) | 1.1E-21 | 0.60                                          | 1.14 (1.09-1.20) | 4.8E-08 | 0.27                                           | 1.06 (1.01-1.12) | 2.0E-02 | 0.34                                                         | 1.09 (0.94-1.27) | 2.4E-01 | 1.6E-26                       | 2.6E-03     |
| VPS26A         | rs1802295  | 10  | 70,601,480             | T       | C     | 0.33                                         | 1.02 (0.98-1.06) | 3.0E-01 | 0.22                                          | 1.01 (0.94-1.09) | 8.0E-01 | 0.27                                           | 1.13 (1.07-1.20) | 7.7E-06 | N/A                                                          | N/A              | N/A     | 1.4E-03                       | 4.4E-03     |
| GCC1           | rs6467136  | 7   | 126,952,194            | G       | A     | 0.55                                         | 0.99 (0.95-1.03) | 5.5E-01 | 0.68                                          | 1.11 (1.05-1.18) | 2.4E-04 | 0.56                                           | 1.01 (0.96-1.06) | 7.6E-01 | 0.49                                                         | 0.96 (0.84-1.10) | 5.8E-01 | 2.0E-01                       | 5.6E-03     |
| TSPAN8         | rs7955901  | 12  | 69,719,560             | C       | T     | 0.47                                         | 1.09 (1.05-1.13) | 9.0E-06 | 0.49                                          | 0.97 (0.92-1.02) | 2.7E-01 | 0.42                                           | 1.03 (0.98-1.08) | 2.3E-01 | 0.54                                                         | 1.00 (0.87-1.14) | 9.9E-01 | 1.6E-03                       | 6.1E-03     |
| GCKR           | rs780094   | 2   | 27,594,741             | C       | T     | 0.62                                         | 1.04 (1.00-1.08) | 3.2E-02 | 0.38                                          | 1.06 (1.01-1.11) | 2.1E-02 | 0.75                                           | 1.19 (1.11-1.29) | 4.2E-06 | 0.65                                                         | 0.99 (0.85-1.14) | 8.5E-01 | 1.0E-05                       | 8.7E-03     |
| GRB14          | rs3923113  | 2   | 165,210,095            | A       | C     | 0.61                                         | 1.04 (1.00-1.09) | 4.0E-02 | 0.77                                          | 1.03 (0.95-1.12) | 4.8E-01 | 0.75                                           | 1.15 (1.09-1.21) | 8.9E-07 | 0.76                                                         | 1.22 (1.03-1.45) | 2.3E-02 | 1.5E-06                       | 1.3E-02     |
| BCAR1          | rs7202877  | 16  | 73,804,746             | T       | G     | 0.90                                         | 1.15 (1.07-1.23) | 5.0E-05 | 0.64                                          | 1.00 (0.93-1.07) | 1.0E+00 | 0.93                                           | 1.06 (0.97-1.16) | 1.9E-01 | 0.93                                                         | 1.38 (1.02-1.87) | 3.5E-02 | 5.7E-04                       | 1.3E-02     |
| ZFAND3         | rs9470794  | 6   | 38,214,822             | C       | T     | 0.19                                         | 0.99 (0.93-1.06) | 8.1E-01 | 0.32                                          | 1.11 (1.05-1.18) | 2.4E-04 | 0.12                                           | 1.07 (0.99-1.15) | 7.3E-02 | 0.08                                                         | 0.82 (0.63-1.06) | 1.2E-01 | 3.6E-03                       | 1.4E-02     |
| PSMD6          | rs831571   | 3   | 64,023,337             | C       | T     | 0.81                                         | 1.03 (0.99-1.08) | 1.8E-01 | 0.45                                          | 1.11 (1.05-1.16) | 4.5E-05 | 0.79                                           | 1.03 (0.98-1.09) | 2.6E-01 | 0.91                                                         | 0.80 (0.63-1.01) | 6.3E-02 | 3.7E-04                       | 1.5E-02     |
| CILP2          | rs10401969 | 19  | 19,268,718             | C       | T     | 0.07                                         | 1.13 (1.05-1.21) | 9.3E-04 | 0.42                                          | 1.01 (0.90-1.12) | 8.9E-01 | 0.10                                           | 1.00 (0.92-1.09) | 9.7E-01 | 0.04                                                         | 1.59 (1.08-2.35) | 1.8E-02 | 9.7E-03                       | 2.0E-02     |
| RASGRP1        | rs7403531  | 15  | 36,610,197             | T       | C     | 0.22                                         | 1.02 (0.98-1.06) | 3.8E-01 | 0.55                                          | 1.08 (1.02-1.13) | 3.8E-03 | 0.25                                           | 0.97 (0.92-1.03) | 3.5E-01 | 0.39                                                         | 0.90 (0.77-1.05) | 1.8E-01 | 1.5E-01                       | 2.1E-02     |
| RBMS1          | rs7593730  | 2   | 160,879,700            | C       | T     | 0.79                                         | 1.11 (1.06-1.16) | 4.3E-06 | 0.72                                          | 1.00 (0.94-1.07) | 9.2E-01 | 0.79                                           | 1.01 (0.95-1.07) | 7.7E-01 | 0.86                                                         | 1.05 (0.86-1.28) | 6.2E-01 | 4.7E-04                       | 2.7E-02     |
| TLE4           | rs17791513 | 9   | 81,095,410             | A       | G     | 0.93                                         | 1.21 (1.13-1.31) | 4.3E-07 | 0.90                                          | 1.00 (0.89-1.11) | 9.4E-01 | 0.87                                           | 1.12 (1.05-1.21) | 1.1E-03 | 0.85                                                         | 1.21 (0.99-1.47) | 6.6E-02 | 3.2E-08                       | 3.0E-02     |
| ZBED3          | rs6878122  | 5   | 76,463,067             | G       | A     | 0.25                                         | 1.13 (1.07-1.18) | 3.2E-06 | 0.09                                          | 1.08 (0.94-1.24) | 3.0E-01 | 0.20                                           | 1.01 (0.96-1.08) | 6.4E-01 | N/A                                                          | N/A              | N/A     | 6.3E-05                       | 3.1E-02     |
| HHEX/IDE       | rs1111875  | 10  | 94,452,862             | C       | T     | 0.58                                         | 1.15 (1.11-1.19) | 1.2E-14 | 0.34                                          | 1.15 (1.09-1.22) | 2.3E-06 | 0.44                                           | 1.07 (1.02-1.12) | 6.9E-03 | 0.64                                                         | 1.00 (0.87-1.16) | 9.6E-01 | 3.2E-19                       | 3.4E-02     |
| CDC123         | rs11257655 | 10  | 12,347,900             | T       | C     | 0.23                                         | 1.06 (1.01-1.11) | 1.7E-02 | 0.61                                          | 1.15 (1.09-1.23) | 3.4E-06 | 0.23                                           | 1.12 (1.06-1.18) | 5.9E-05 | 0.30                                                         | 0.96 (0.81-1.13) | 6.2E-01 | 2.6E-09                       | 4.3E-02     |
| ARAP1 (CENTD2) | rs1552224  | 11  | 72,110,746             | A       | C     | 0.83                                         | 1.13 (1.08-1.19) | 1.5E-06 | 0.89                                          | 1.16 (1.05-1.28) | 2.5E-03 | 0.83                                           | 1.04 (0.98-1.11) | 2.2E-01 | N/A                                                          | N/A              | N/A     | 1.2E-07                       | 5.5E-02     |
| KCNQ1          | rs163184   | 11  | 2,803,645              | G       | T     | 0.50                                         | 1.09 (1.04-1.13) | 4.3E-05 | 0.39                                          | 1.16 (1.10-1.23) | 1.6E-08 | 0.53                                           | 1.08 (1.03-1.13) | 1.2E-03 | 0.48                                                         | 1.23 (1.06-1.43) | 6.6E-03 | 1.7E-14                       | 5.8E-02     |
| NOTCH2         | rs10923931 | 1   | 120,319,482            | T       | G     | 0.11                                         | 1.10 (1.04-1.17) | 5.8E-04 | 0.05                                          | 1.00 (0.86-1.16) | 9.9E-01 | 0.18                                           | 1.01 (0.95-1.07) | 8.3E-01 | 0.10                                                         | 0.89 (0.70-1.13) | 3.3E-01 | 1.7E-02                       | 6.8E-02     |
| JAZF1          | rs849135   | 7   | 28,162,938             | G       | A     | 0.52                                         | 1.12 (1.08-1.17) | 1.9E-09 | 0.51                                          | 1.01 (0.76-1.33) | 9.5E-01 | 0.73                                           | 1.04 (0.98-1.10) | 1.6E-01 | 0.67                                                         | 1.19 (1.03-1.38) | 1.9E-02 | 1.7E-09                       | 6.9E-02     |
| KCNJ11         | rs5215     | 11  | 17,365,206             | C       | T     | 0.38                                         | 1.08 (1.04-1.12) | 1.1E-05 | 0.35                                          | 1.14 (1.09-1.20) | 1.6E-07 | 0.37                                           | 1.04 (0.99-1.09) | 1.1E-01 | 0.39                                                         | 1.11 (0.96-1.28) | 1.8E-01 | 3.2E-11                       | 7.2E-02     |
| DGKB           | rs17168486 | 7   | 14,864,807             | T       | C     | 0.19                                         | 1.13 (1.07-1.19) | 2.1E-06 | 0.58                                          | 1.08 (1.02-1.14) | 5.5E-03 | 0.30                                           | 1.04 (0.99-1.10) | 1.1E-01 | 0.45                                                         | 0.96 (0.82-1.13) | 6.5E-01 | 3.4E-07                       | 7.6E-02     |
| THADA          | rs10203174 | 2   | 43,543,534             | C       | T     | 0.90                                         | 1.15 (1.08-1.21) | 4.7E-06 | 0.99                                          | 1.57 (0.46-5.34) | 4.7E-01 | 0.85                                           | 1.01 (0.92-1.11) | 8.3E-01 | N/A                                                          | N/A              | N/A     | 4.8E-05                       | 8.3E-02     |
| KCNK16         | rs1535500  | 6   | 39,392,028             | T       | G     | N/A                                          | N/A              | N/A     | 0.59                                          | 1.13 (1.08-1.19) | 1.8E-06 | 0.50                                           | 1.04 (0.98-1.10) | 2.3E-01 | 0.48                                                         | 1.06 (0.92-1.22) | 4.2E-01 | 7.5E-06                       | 9.2E-02     |
| ST6GAL1        | rs16861329 | 3   | 188,149,155            | C       | T     | 0.85                                         | 1.03 (0.96-1.10) | 4.1E-01 | 0.60                                          | 0.92 (0.86-0.99) | 1.8E-02 | 0.77                                           | 1.13 (1.07-1.19) | 2.2E-05 | N/A                                                          | N/A              | N/A     | 8.5E-06                       | 1.1E-01     |
| MTNR1B         | rs10830963 | 11  | 92,348,358             | G       | C     | 0.27                                         | 1.11 (1.06-1.16) | 2.5E-06 | 0.59                                          | 1.00 (0.93-1.08) | 9.5E-01 | 0.37                                           | 1.10 (1.03-1.16) | 2.3E-03 | 0.22                                                         | 1.12 (0.94-1.33) | 2.2E-01 | 2.0E-07                       | 1.2E-01     |
| PTPRD          | rs17584499 | 9   | 8,869,118              | T       | C     | 0.18                                         | 1.00 (0.94-1.07) | 9.4E-01 | 0.22                                          | 1.09 (1.00-1.19) | 4.0E-02 | 0.26                                           | 0.98 (0.93-1.04) | 5.5E-01 | N/A                                                          | N/A              | N/A     | 6.0E-01                       | 1.2E-01     |
| PROX1          | rs2075423  | 1   | 212,221,342            | G       | T     | 0.66                                         | 1.08 (1.04-1.12) | 1.6E-04 | 0.73                                          | 1.10 (1.02-1.18) | 1.3E-02 | 0.75                                           | 1.03 (0.98-1.09) | 2.9E-01 | 0.72                                                         | 1.23 (1.05-1.46) | 1.2E-02 | 2.2E-06                       | 1.4E-01     |
| HNF4A          | rs4812829  | 20  | 42,422,681             | A       | G     | 0.16                                         | 1.07 (1.01-1.12) | 1.3E-02 | 0.33                                          | 1.07 (1.01-1.13) | 1.6E-02 | 0.29                                           | 1.13 (1.08-1.19) | 1.6E-06 | 0.51                                                         | 0.98 (0.84-1.14) | 7.8E-01 | 4.6E-08                       | 1.5E-01     |
| GIPR           | rs8108269  | 19  | 50,850,353             | G       | T     | 0.30                                         | 1.06 (1.02-1.11) | 5.0E-03 | 0.40                                          | 1.12 (1.05-1.19) | 3.5E-04 | 0.32                                           | 1.06 (1.01-1.11) | 2.8E-02 | 0.44                                                         | 0.93 (0.80-1.09) | 3.8E-01 | 4.9E-06                       | 1.5E-01     |
| HMG2           | rs2261181  | 12  | 64,498,585             | T       | C     | 0.09                                         | 1.16 (1.10-1.23) | 3.9E-07 | 0.19                                          | 1.09 (1.01-1.18) | 2.3E-02 | 0.18                                           | 1.07 (1.00-1.13) | 3.6E-02 | 0.08                                                         | 0.99 (0.78-1.28) | 9.6E-01 | 3.6E-08                       | 1.8E-01     |
| SPRY2          | rs1359790  | 13  | 79,615,157             | G       | A     | 0.73                                         | 1.10 (1.05-1.14) | 3.2E-06 | 0.68                                          | 1.05 (0.99-1.11) | 1.0E-01 | 0.83                                           | 1.02 (0.96-1.09) | 4.7E-01 | 0.60                                                         | 1.02 (0.89-1.18) | 7.6E-01 | 5.8E-06                       | 2.2E-01     |
| AP352          | rs2028299  | 15  | 88,175,261             | C       | A     | 0.29                                         | 1.04 (1.00-1.09) | 4.4E-02 | 0.26                                          | 1.08 (1.02-1.14) | 1.3E-02 | 0.32                                           | 1.11 (1.05-1.16) | 4.5E-05 | 0.16                                                         | 1.17 (0.97-1.42) | 1.0E-01 | 5.2E-07                       | 2.4E-01     |
| ADAMTS9        | rs6795735  | 3   | 64,680,405             | C       | T     | 0.59                                         | 1.07 (1.03-1.10) | 4.4E-04 | 0.35                                          | 1.00 (0.94-1.05) | 9.1E-01 | 0.28                                           | 1.06 (1.01-1.12) | 2.5E-02 | 0.25                                                         | 1.06 (0.91-1.24) | 4.6E-01 | 2.1E-04                       | 2.5E-01     |
| GCK            | rs10278336 | 7   | 44,211,888             | A       | G     | 0.54                                         | 1.05 (1.01-1.09) | 2.7E-02 | 0.51                                          | 1.01 (0.93-1.08) | 9.0E-01 | 0.55                                           | 1.00 (0.95-1.04) | 8.6E-01 | N/A                                                          | N/A              | N/A     | 1.3E-01                       | 2.6E-01     |
| ZFAND6         | rs11634397 | 15  | 78,219,277             | G       | A     | 0.64                                         | 1.09 (1.05-1.13) | 1.8E-05 | 0.13                                          | 1.00 (0.90-1.11) | 9.9E-01 | 0.53                                           | 1.05 (0.99-1.12) | 7.6E-02 | N/A                                                          | N/A              | N/A     | 1.4E-05                       | 2.8E-01     |

|          |            |    |             |   |   |      |                  |         |      |                  |         |      |                  |         |      |                  |         |         |         |
|----------|------------|----|-------------|---|---|------|------------------|---------|------|------------------|---------|------|------------------|---------|------|------------------|---------|---------|---------|
| FTO      | rs9936385  | 16 | 52,376,670  | C | T | 0.39 | 1.13 (1.09-1.18) | 3.2E-10 | 0.42 | 1.09 (1.01-1.17) | 3.4E-02 | 0.32 | 1.07 (1.02-1.13) | 1.0E-02 | 0.27 | 1.17 (1.00-1.37) | 5.7E-02 | 1.2E-12 | 3.0E-01 |
| GLIS3    | rs7041847  | 9  | 4,277,466   | A | G | 0.50 | 1.05 (1.01-1.09) | 1.4E-02 | 0.43 | 1.10 (1.05-1.15) | 9.3E-05 | 0.56 | 1.04 (0.99-1.08) | 1.5E-01 | 0.63 | 1.07 (0.93-1.24) | 3.5E-01 | 5.4E-06 | 3.1E-01 |
| CCND2    | rs11063069 | 12 | 4,244,634   | G | A | 0.21 | 1.10 (1.04-1.15) | 3.2E-04 | 0.05 | 0.97 (0.84-1.13) | 7.0E-01 | 0.12 | 1.02 (0.92-1.14) | 6.8E-01 | 0.11 | 1.15 (0.92-1.43) | 2.1E-01 | 7.5E-04 | 3.2E-01 |
| IGFBP2   | rs4402960  | 3  | 186,994,381 | T | G | 0.31 | 1.13 (1.09-1.17) | 1.8E-10 | 0.42 | 1.08 (1.02-1.13) | 5.9E-03 | 0.42 | 1.12 (1.07-1.18) | 1.9E-06 | 0.25 | 1.22 (1.04-1.43) | 1.3E-02 | 9.5E-18 | 3.3E-01 |
| TMEM163  | rs6723108  | 2  | 135,196,450 | T | G | 0.48 | 1.01 (0.97-1.05) | 7.2E-01 | 0.50 | 1.90 (0.65-5.56) | 2.4E-01 | 0.85 | 1.05 (0.97-1.15) | 2.4E-01 | N/A  | N/A              | N/A     | 4.0E-01 | 3.3E-01 |
| PPARG    | rs1801282  | 3  | 12,368,125  | C | G | 0.88 | 1.16 (1.10-1.23) | 1.7E-08 | 0.93 | 1.15 (1.01-1.30) | 3.2E-02 | 0.87 | 1.09 (1.00-1.18) | 4.1E-02 | N/A  | N/A              | N/A     | 5.7E-10 | 3.5E-01 |
| HNF1B    | rs4430796  | 17 | 33,172,153  | G | A | 0.53 | 1.13 (1.07-1.09) | 6.6E-06 | 0.42 | 1.12 (1.05-1.19) | 8.3E-04 | 0.37 | 1.07 (1.02-1.13) | 4.2E-03 | N/A  | N/A              | N/A     | 8.9E-10 | 3.6E-01 |
| PRC1     | rs12899811 | 15 | 89,345,080  | G | A | 0.30 | 1.09 (1.04-1.13) | 7.1E-05 | 0.52 | 1.16 (1.00-1.35) | 5.1E-02 | 0.55 | 1.05 (1.00-1.10) | 3.6E-02 | 0.66 | 1.17 (1.01-1.36) | 1.4E-02 | 5.7E-07 | 3.9E-01 |
| CDKN2A/B | rs10811661 | 9  | 22,124,094  | T | C | 0.82 | 1.18 (1.13-1.24) | 1.2E-12 | 0.67 | 1.25 (1.17-1.32) | 6.3E-13 | 0.87 | 1.20 (1.11-1.31) | 1.4E-05 | N/A  | N/A              | N/A     | 1.1E-27 | 3.9E-01 |
| HNF1A    | rs12427353 | 12 | 119,911,284 | G | C | 0.77 | 1.12 (1.07-1.18) | 2.8E-06 | N/A  | N/A              | N/A     | 0.95 | 1.04 (0.87-1.23) | 6.9E-01 | N/A  | N/A              | N/A     | 3.9E-06 | 3.9E-01 |
| GRK5     | rs10886471 | 10 | 121,139,393 | C | T | 0.49 | 0.99 (0.95-1.03) | 6.1E-01 | 0.64 | 1.06 (0.99-1.13) | 1.0E-01 | 0.60 | 1.01 (0.96-1.05) | 8.3E-01 | 0.50 | 1.03 (0.88-1.20) | 7.4E-01 | 6.1E-01 | 4.3E-01 |
| ANK1     | rs1516946  | 8  | 41,638,405  | C | T | 0.77 | 1.10 (1.06-1.15) | 2.1E-06 | 0.72 | 1.04 (0.97-1.12) | 2.7E-01 | 0.80 | 1.08 (1.02-1.14) | 1.0E-02 | 0.81 | 1.01 (0.85-1.20) | 9.4E-01 | 1.5E-07 | 4.4E-01 |
| SRR      | rs391300   | 17 | 2,163,008   | C | T | 0.62 | 1.00 (0.96-1.04) | 9.5E-01 | 0.63 | 1.03 (0.97-1.09) | 2.7E-01 | 0.51 | 0.99 (0.94-1.03) | 6.1E-01 | 0.66 | 1.09 (0.92-1.28) | 3.2E-01 | 6.8E-01 | 5.1E-01 |
| KLHDC5   | rs10842994 | 12 | 27,856,417  | C | T | 0.80 | 1.09 (1.04-1.13) | 3.0E-04 | 0.65 | 1.03 (0.95-1.12) | 5.2E-01 | 0.88 | 1.11 (1.03-1.20) | 9.1E-03 | 0.85 | 1.14 (0.95-1.37) | 1.7E-01 | 7.9E-06 | 5.3E-01 |
| TP53INP1 | rs7845219  | 8  | 96,006,678  | T | C | 0.53 | 1.08 (1.04-1.12) | 3.2E-05 | 0.37 | 1.07 (1.01-1.13) | 1.4E-02 | 0.42 | 1.07 (1.02-1.12) | 4.9E-03 | 0.37 | 0.97 (0.84-1.12) | 6.8E-01 | 6.4E-08 | 5.4E-01 |
| C2CD4A   | rs17163757 | 15 | 60,178,900  | C | T | 0.56 | 1.06 (1.02-1.11) | 2.2E-03 | 0.46 | 1.12 (1.04-1.20) | 2.0E-03 | 0.62 | 1.05 (1.00-1.11) | 4.1E-02 | 0.52 | 1.05 (0.91-1.21) | 5.1E-01 | 3.6E-06 | 5.5E-01 |
| BCL11A   | rs243088   | 2  | 60,422,249  | T | A | 0.46 | 1.09 (1.04-1.13) | 2.6E-05 | 0.57 | 1.06 (1.00-1.13) | 6.4E-02 | 0.53 | 1.04 (0.99-1.09) | 1.1E-01 | 0.57 | 1.03 (0.89-1.20) | 7.0E-01 | 3.2E-06 | 5.5E-01 |
| DUSP8    | rs2334499  | 11 | 1,653,425   | T | C | 0.40 | 1.07 (1.03-1.11) | 1.3E-03 | 0.63 | 1.04 (0.98-1.10) | 1.7E-01 | 0.28 | 1.02 (0.97-1.08) | 4.2E-01 | 0.49 | 1.00 (0.87-1.15) | 9.6E-01 | 1.0E-03 | 5.6E-01 |
| SLC30A8  | rs3802177  | 8  | 118,254,206 | G | A | 0.70 | 1.16 (1.11-1.22) | 1.3E-10 | 0.64 | 1.11 (1.06-1.17) | 2.6E-05 | 0.76 | 1.13 (1.07-1.19) | 2.5E-05 | 0.75 | 1.14 (0.95-1.36) | 1.5E-01 | 1.8E-18 | 6.2E-01 |
| WFS1     | rs4458523  | 4  | 6,340,887   | G | T | 0.59 | 1.09 (1.06-1.13) | 5.8E-07 | 0.95 | 1.07 (0.96-1.20) | 1.9E-01 | 0.68 | 1.07 (1.02-1.12) | 1.0E-02 | 0.76 | 1.19 (1.01-1.39) | 3.6E-02 | 2.1E-09 | 6.2E-01 |
| ANKRD55  | rs459193   | 5  | 55,842,508  | G | A | 0.74 | 1.05 (1.01-1.10) | 2.7E-02 | 0.66 | 1.05 (1.00-1.11) | 4.3E-02 | 0.64 | 1.03 (0.98-1.08) | 2.7E-01 | 0.76 | 1.14 (0.97-1.34) | 1.2E-01 | 8.9E-04 | 6.7E-01 |
| TLE1     | rs2796441  | 9  | 83,498,768  | G | A | 0.63 | 1.07 (1.03-1.12) | 4.9E-04 | 0.51 | 1.10 (1.03-1.17) | 6.1E-03 | 0.52 | 1.05 (1.00-1.10) | 5.6E-02 | 0.51 | 1.07 (0.92-1.25) | 3.6E-01 | 1.6E-06 | 7.7E-01 |
| IRS1     | rs2943640  | 2  | 226,801,829 | C | A | 0.63 | 1.09 (1.05-1.13) | 4.8E-06 | 0.57 | 1.13 (1.02-1.25) | 1.8E-02 | 0.76 | 1.09 (1.03-1.16) | 6.3E-03 | N/A  | N/A              | N/A     | 7.2E-09 | 7.9E-01 |
| UBE2E2   | rs7612463  | 3  | 23,311,454  | C | A | 0.87 | 1.10 (1.04-1.16) | 1.6E-03 | 0.64 | 1.13 (1.06-1.20) | 9.4E-05 | 0.78 | 1.09 (1.03-1.15) | 3.7E-03 | 0.94 | 1.16 (0.86-1.56) | 3.3E-01 | 6.7E-09 | 8.3E-01 |
| HMG20A   | rs7178572  | 15 | 75,534,245  | G | A | 0.70 | 1.08 (1.04-1.13) | 1.9E-04 | 0.59 | 1.09 (1.04-1.14) | 4.4E-04 | 0.52 | 1.10 (1.05-1.15) | 4.2E-05 | 0.66 | 1.15 (0.99-1.33) | 6.7E-02 | 1.5E-11 | 8.4E-01 |
| ZMIZ1    | rs12571751 | 10 | 80,612,637  | A | G | 0.51 | 1.09 (1.06-1.13) | 7.1E-07 | 0.47 | 1.07 (1.00-1.13) | 3.7E-02 | 0.57 | 1.08 (1.03-1.14) | 1.4E-03 | 0.50 | 1.09 (0.95-1.25) | 2.3E-01 | 2.4E-10 | 9.3E-01 |
| ADCY5    | rs11717195 | 3  | 124,565,088 | T | C | 0.78 | 1.09 (1.05-1.14) | 2.6E-05 | 0.50 | 1.18 (0.67-2.05) | 5.7E-01 | 0.78 | 1.10 (1.04-1.17) | 9.9E-04 | 0.73 | 1.15 (0.98-1.36) | 8.9E-02 | 2.2E-08 | 9.4E-01 |
| MC4R     | rs12970134 | 18 | 56,035,730  | A | G | 0.27 | 1.08 (1.03-1.12) | 2.3E-04 | 0.37 | 1.07 (1.01-1.14) | 3.0E-02 | 0.37 | 1.09 (1.04-1.15) | 3.6E-04 | 0.15 | 1.06 (0.87-1.28) | 5.6E-01 | 2.6E-08 | 9.5E-01 |
| RND3     | rs7560163  | 2  | 151,346,182 | C | G | N/A  | N/A              | N/A     | 0.74 | 1.05 (0.90-1.22) | 5.5E-01 | 0.97 | 1.05 (0.84-1.30) | 6.9E-01 | N/A  | N/A              | N/A     | 4.7E-01 | 9.9E-01 |
| MAEA     | rs6815464  | 4  | 1,299,901   | C | G | N/A  | N/A              | N/A     | 0.47 | 1.10 (1.04-1.16) | 4.3E-04 | N/A  | N/A              | N/A     | N/A  | N/A              | N/A     | 4.4E-04 | N/A     |

**Supplementary Table 4. Concordance in the direction of effect of T2D risk alleles identified in meta-analyses of GWAS of European (12,171 cases and 56,862 controls), East Asian (6,952 cases and 11,865 controls), South Asian (5,561 cases and 14,458 controls), and Mexican and Mexican American (1,804 cases and 779 controls) ancestry, after exclusion of the 69 established autosomal susceptibility loci, defined as mapping within 500kb of the previously reported lead SNP.**

| <b>p-value threshold</b>                          | <b>Trans-ethnic concordance</b>                   |          |                              |                                                     |          |                              |                                                      |          |                              |
|---------------------------------------------------|---------------------------------------------------|----------|------------------------------|-----------------------------------------------------|----------|------------------------------|------------------------------------------------------|----------|------------------------------|
|                                                   | <b>Concordant SNPs / Total SNPs</b>               | <b>%</b> | <b>Binomial test p-value</b> | <b>Concordant SNPs / Total SNPs</b>                 | <b>%</b> | <b>Binomial test p-value</b> | <b>Concordant SNPs / Total SNPs</b>                  | <b>%</b> | <b>Binomial test p-value</b> |
| <b>European meta-analysis</b>                     | <b>European into East Asian</b>                   |          |                              | <b>European into South Asian</b>                    |          |                              | <b>European into Mexican and Mexican American</b>    |          |                              |
| $p \leq 0.001$                                    | 180/316                                           | 57.0     | 0.0077                       | 175/316                                             | 55.4     | 0.032                        | 179/316                                              | 56.6     | 0.010                        |
| $0.001 < p \leq 0.01$                             | 877/1624                                          | 54.0     | 0.00068                      | 861/1624                                            | 53.0     | 0.0080                       | 886/1624                                             | 54.6     | 0.00013                      |
| $0.01 < p \leq 0.5$                               | 2556/5053                                         | 50.6     | 0.21                         | 2604/5053                                           | 51.5     | 0.015                        | 2588/5053                                            | 51.2     | 0.043                        |
| $0.5 < p \leq 1$                                  | 2535/5039                                         | 50.3     | 0.34                         | 2532/5039                                           | 50.2     | 0.37                         | 2519/5039                                            | 50.0     | 0.51                         |
| <b>East Asian meta-analysis</b>                   | <b>East Asian into European</b>                   |          |                              | <b>East Asian into South Asian</b>                  |          |                              | <b>East Asian into Mexican and Mexican American</b>  |          |                              |
| $p \leq 0.001$                                    | 233/416                                           | 56.0     | 0.0081                       | 220/416                                             | 52.9     | 0.13                         | 214/416                                              | 51.4     | 0.29                         |
| $0.001 < p \leq 0.01$                             | 1117/2120                                         | 52.7     | 0.0071                       | 1090/2120                                           | 51.4     | 0.10                         | 1047/2120                                            | 49.4     | 0.72                         |
| $0.01 < p \leq 0.5$                               | 2549/5075                                         | 50.2     | 0.38                         | 2661/5075                                           | 52.4     | 0.00028                      | 2539/5075                                            | 50.0     | 0.49                         |
| $0.5 < p \leq 1$                                  | 2561/5069                                         | 50.5     | 0.23                         | 2555/5069                                           | 50.4     | 0.29                         | 2563/5069                                            | 50.6     | 0.22                         |
| <b>South Asian meta-analysis</b>                  | <b>South Asian into European</b>                  |          |                              | <b>South Asian into East Asian</b>                  |          |                              | <b>South Asian into Mexican and Mexican American</b> |          |                              |
| $p \leq 0.001$                                    | 176/281                                           | 62.6     | $1.4 \times 10^{-5}$         | 153/281                                             | 54.4     | 0.076                        | 150/281                                              | 53.4     | 0.14                         |
| $0.001 < p \leq 0.01$                             | 837/1552                                          | 53.9     | 0.0011                       | 793/1552                                            | 51.1     | 0.20                         | 788/1552                                             | 50.8     | 0.28                         |
| $0.01 < p \leq 0.5$                               | 2625/5045                                         | 52.0     | 0.0020                       | 2558/5045                                           | 50.7     | 0.16                         | 2575/5045                                            | 51.0     | 0.071                        |
| $0.5 < p \leq 1$                                  | 2521/5037                                         | 50.0     | 0.48                         | 2524/5037                                           | 50.1     | 0.44                         | 2530/5037                                            | 50.2     | 0.38                         |
| <b>Mexican and Mexican American meta-analysis</b> | <b>Mexican and Mexican American into European</b> |          |                              | <b>Mexican and Mexican American into East Asian</b> |          |                              | <b>Mexican and Mexican American into South Asian</b> |          |                              |
| $p \leq 0.001$                                    | 155/282                                           | 55.0     | 0.054                        | 143/282                                             | 50.7     | 0.43                         | 151/282                                              | 53.5     | 0.13                         |
| $0.001 < p \leq 0.01$                             | 796/1501                                          | 53.0     | 0.010                        | 763/1501                                            | 50.8     | 0.27                         | 745/1501                                             | 49.6     | 0.62                         |
| $0.01 < p \leq 0.5$                               | 2542/5026                                         | 50.6     | 0.21                         | 2518/5026                                           | 50.1     | 0.45                         | 2542/5026                                            | 50.6     | 0.21                         |
| $0.5 < p \leq 1$                                  | 2539/5025                                         | 50.5     | 0.23                         | 2521/5025                                           | 50.2     | 0.41                         | 2531/5025                                            | 50.4     | 0.31                         |

**Supplementary Table 5. T2D susceptibility loci attaining strong evidence of association ( $p < 10^{-5}$ ), not previously reported at genome-wide significance in any ancestry group, identified through trans-ethnic “discovery” GWAS meta-analysis of 26,488 cases and 83,964 controls of European, East Asian, South Asian, and Mexican and Mexican American ancestry, and follow-up in a “validation” meta-analysis of an additional 21,491 cases and 55,647 controls of European ancestry, genotyped with the Metabochip.**

| Locus               | Lead SNP   | Metabochip proxy SNP | HapMap $r^2$ |         | Chr | Build 36 position (bp) | Alleles |       | Trans-ethnic “discovery” meta-analysis |                  |            | European ancestry “validation” meta-analysis |                  |            | Combined meta-analysis |                  |                |                        |
|---------------------|------------|----------------------|--------------|---------|-----|------------------------|---------|-------|----------------------------------------|------------------|------------|----------------------------------------------|------------------|------------|------------------------|------------------|----------------|------------------------|
|                     |            |                      | CEU          | CHB JPT |     |                        | Risk    | Other | Sample size                            | OR (95% CI)      | $p$ -value | Sample size                                  | OR (95% CI)      | $p$ -value | Sample size            | OR (95% CI)      | $p$ -value     | Cochran’s Q $p$ -value |
| <i>TMEM154</i>      | rs6813195  |                      |              |         | 4   | 153,739,925            | C       | T     | 110,214                                | 1.08 (1.05-1.11) | 4.2E-09    | 51,425                                       | 1.08 (1.05-1.11) | 2.0E-06    | 161,639                | 1.08 (1.06-1.10) | <b>4.1E-14</b> | 9.6E-01                |
| <i>SSR1/RREB1</i>   | rs9502570  | rs9505118            | 0.256        | 0.264   | 6   | 7,235,436              | A       | G     | 106,952                                | 1.06 (1.04-1.09) | 1.9E-06    | 51,396                                       | 1.06 (1.03-1.09) | 1.7E-04    | 158,348                | 1.06 (1.04-1.08) | <b>1.4E-09</b> | 7.7E-01                |
| <i>FAF1</i>         | rs17106184 |                      |              |         | 1   | 50,682,573             | G       | A     | 110,157                                | 1.11 (1.07-1.16) | 1.9E-06    | 51,428                                       | 1.09 (1.04-1.15) | 4.8E-04    | 161,585                | 1.10 (1.07-1.14) | <b>4.1E-09</b> | 6.1E-01                |
| <i>POU5F1/TCF19</i> | rs3132524  | rs3130501            | 0.961        | 1.000   | 6   | 31,244,432             | G       | A     | 106,231                                | 1.07 (1.04-1.10) | 1.5E-06    | 49,584                                       | 1.06 (1.03-1.10) | 7.0E-04    | 155,815                | 1.07 (1.04-1.09) | <b>4.2E-09</b> | 7.9E-01                |
| <i>LPP</i>          | rs6808574  |                      |              |         | 3   | 189,223,217            | C       | T     | 94,079                                 | 1.08 (1.04-1.11) | 4.3E-06    | 46,008                                       | 1.06 (1.03-1.09) | 2.6E-04    | 140,087                | 1.07 (1.04-1.09) | <b>5.8E-09</b> | 4.8E-01                |
| <i>ARL15</i>        | rs702634   |                      |              |         | 5   | 53,307,177             | A       | G     | 103,376                                | 1.08 (1.05-1.11) | 3.4E-07    | 51,421                                       | 1.05 (1.02-1.08) | 2.1E-03    | 154,797                | 1.06 (1.04-1.09) | <b>6.9E-09</b> | 1.7E-01                |
| <i>MPHOSPH9</i>     | rs1727313  | rs4275659            | 0.476        | 0.039   | 12  | 122,013,881            | C       | T     | 110,015                                | 1.06 (1.03-1.09) | 5.5E-06    | 51,444                                       | 1.06 (1.02-1.09) | 4.4E-04    | 161,459                | 1.06 (1.04-1.08) | <b>9.5E-09</b> | 8.5E-01                |
| <i>PLEKHA1</i>      | rs10510110 | rs2421016            | 1.000        | 1.000   | 10  | 124,157,502            | C       | T     | 107,847                                | 1.05 (1.03-1.08) | 1.9E-05    | 50,197                                       | 1.05 (1.02-1.08) | 1.6E-03    | 158,044                | 1.05 (1.03-1.07) | 1.1E-07        | 7.0E-01                |
| <i>TMEM75</i>       | rs1561927  |                      |              |         | 8   | 129,637,260            | C       | T     | 104,569                                | 1.08 (1.05-1.11) | 1.9E-06    | 51,435                                       | 1.04 (1.01-1.08) | 6.6E-03    | 156,004                | 1.06 (1.04-1.09) | 1.2E-07        | 1.5E-01                |
| <i>TMEM18</i>       | rs10190052 |                      |              |         | 2   | 636,674                | C       | T     | 104,516                                | 1.09 (1.05-1.13) | 7.5E-06    | 51,447                                       | 1.06 (1.02-1.10) | 3.4E-03    | 155,963                | 1.07 (1.04-1.10) | 1.5E-07        | 3.2E-01                |
| <i>RNF6</i>         | rs10507349 |                      |              |         | 13  | 25,679,528             | G       | A     | 110,032                                | 1.07 (1.04-1.09) | 5.0E-06    | 51,447                                       | 1.05 (1.01-1.08) | 6.7E-03    | 161,479                | 1.06 (1.04-1.08) | 1.5E-07        | 4.6E-01                |
| <i>VEGFA</i>        | rs9472138  |                      |              |         | 6   | 43,919,740             | T       | C     | 106,235                                | 1.07 (1.04-1.10) | 3.0E-06    | 51,450                                       | 1.04 (1.01-1.07) | 8.8E-03    | 157,685                | 1.06 (1.04-1.08) | 2.0E-07        | 2.0E-01                |
| <i>ETV1</i>         | rs7795991  |                      |              |         | 7   | 13,867,256             | G       | A     | 99,500                                 | 1.07 (1.04-1.10) | 1.7E-06    | 51,446                                       | 1.03 (1.00-1.06) | 3.1E-02    | 150,946                | 1.05 (1.03-1.07) | 7.1E-07        | 8.4E-02                |
| <i>PCBD2</i>        | rs319598   |                      |              |         | 5   | 134,268,134            | C       | T     | 104,492                                | 1.06 (1.04-1.09) | 7.7E-07    | 51,425                                       | 1.02 (0.99-1.05) | 1.3E-01    | 155,917                | 1.05 (1.03-1.07) | 2.2E-06        | 3.6E-02                |
| <i>LYPLAL1</i>      | rs2820446  |                      |              |         | 1   | 217,815,441            | C       | G     | 110,143                                | 1.06 (1.04-1.09) | 6.9E-06    | 51,390                                       | 1.03 (1.00-1.06) | 4.3E-02    | 161,533                | 1.05 (1.03-1.07) | 2.3E-06        | 1.6E-01                |
| <i>C6orf173</i>     | rs4273712  |                      |              |         | 6   | 127,006,203            | G       | A     | 100,585                                | 1.07 (1.04-1.10) | 1.2E-06    | 51,447                                       | 1.02 (0.99-1.06) | 1.3E-01    | 152,032                | 1.05 (1.03-1.07) | 3.0E-06        | 4.3E-02                |
| <i>C10orf35</i>     | rs2812533  | rs17578395           | 0.671        | 0.373   | 10  | 71,085,247             | C       | A     | 107,876                                | 1.08 (1.05-1.12) | 3.9E-06    | 26,019                                       | 1.03 (0.99-1.08) | 1.8E-01    | 133,895                | 1.07 (1.04-1.09) | 5.0E-06        | 1.3E-01                |
| <i>IL20RA</i>       | rs6937795  | rs4407733            | 1.000        | 1.000   | 6   | 137,340,845            | A       | G     | 102,178                                | 1.06 (1.03-1.09) | 8.9E-06    | 49,574                                       | 1.03 (1.00-1.06) | 7.5E-02    | 151,752                | 1.04 (1.02-1.06) | 6.6E-06        | 1.1E-01                |
| <i>CRHR2</i>        | rs2284219  | rs2284218            | 1.000        | 0.888   | 7   | 30,680,858             | T       | C     | 94,286                                 | 1.07 (1.04-1.10) | 2.5E-06    | 26,033                                       | 1.02 (0.98-1.06) | 3.0E-01    | 120,319                | 1.05 (1.03-1.08) | 7.7E-06        | 7.3E-02                |
| <i>PTEN</i>         | rs10788575 |                      |              |         | 10  | 89,758,564             | A       | G     | 110,091                                | 1.08 (1.04-1.11) | 2.3E-06    | 51,440                                       | 1.02 (0.98-1.07) | 2.7E-01    | 161,531                | 1.06 (1.03-1.08) | 8.7E-06        | 5.3E-02                |
| <i>CPNE4</i>        | rs6792706  | rs9840453            | 1.000        | 0.955   | 3   | 133,260,155            | T       | G     | 98,256                                 | 1.08 (1.05-1.12) | 3.1E-06    | 51,395                                       | 1.03 (0.99-1.06) | 1.3E-01    | 149,651                | 1.05 (1.03-1.08) | 1.2E-05        | 2.7E-02                |
| <i>THRAP2</i>       | rs7133159  | rs10774811           | 0.799        | 0.602   | 12  | 114,349,025            | T       | C     | 103,559                                | 1.06 (1.03-1.09) | 4.2E-05    | 51,447                                       | 1.03 (1.00-1.06) | 7.3E-02    | 155,006                | 1.04 (1.02-1.06) | 2.4E-05        | 1.5E-01                |
| <i>MSRA</i>         | rs17150816 |                      |              |         | 8   | 9,828,147              | C       | A     | 61,864                                 | 1.27 (1.15-1.41) | 5.5E-06    | 51,450                                       | 1.06 (0.99-1.13) | 8.1E-02    | 113,314                | 1.12 (1.06-1.18) | 9.3E-05        | 3.7E-03                |
| <i>PFTK1</i>        | rs17163563 |                      |              |         | 7   | 90,546,497             | A       | G     | 78,195                                 | 1.19 (1.11-1.28) | 2.9E-06    | 51,439                                       | 1.03 (0.98-1.08) | 2.8E-01    | 129,634                | 1.08 (1.03-1.12) | 3.9E-04        | 1.2E-03                |
| <i>SLIT3</i>        | rs11739950 |                      |              |         | 5   | 168,346,952            | A       | G     | 70,709                                 | 1.29 (1.16-1.43) | 2.5E-06    | 50,417                                       | 1.03 (0.94-1.12) | 5.5E-01    | 121,126                | 1.12 (1.05-1.20) | 6.4E-04        | 9.7E-04                |
| <i>WNK2</i>         | rs10761209 | rs10821106           | 1.000        | 0.935   | 9   | 95,100,580             | T       | C     | 104,496                                | 1.06 (1.03-1.09) | 1.5E-05    | 50,409                                       | 1.02 (0.99-1.05) | 2.4E-01    | 154,905                | 1.03 (1.01-1.05) | 9.7E-03        | 2.4E-04                |
| <i>PKP1</i>         | rs6427896  | N/A                  |              |         |     |                        |         |       |                                        |                  |            |                                              |                  |            |                        |                  |                |                        |
| <i>ATP2B2</i>       | rs13071035 | N/A                  |              |         |     |                        |         |       |                                        |                  |            |                                              |                  |            |                        |                  |                |                        |
| <i>PLAC9</i>        | rs7088994  | N/A                  |              |         |     |                        |         |       |                                        |                  |            |                                              |                  |            |                        |                  |                |                        |
| <i>C14orf174</i>    | rs11844594 | N/A                  |              |         |     |                        |         |       |                                        |                  |            |                                              |                  |            |                        |                  |                |                        |
| <i>LAMA1</i>        | rs9948462  | N/A                  |              |         |     |                        |         |       |                                        |                  |            |                                              |                  |            |                        |                  |                |                        |
| <i>APOC1</i>        | rs4420638  | N/A                  |              |         |     |                        |         |       |                                        |                  |            |                                              |                  |            |                        |                  |                |                        |
| <i>C20orf166</i>    | rs6062238  | N/A                  |              |         |     |                        |         |       |                                        |                  |            |                                              |                  |            |                        |                  |                |                        |

**Supplementary Table 6. Association summary statistics in each ancestry group (European, East Asian, South Asian, and Mexican and Mexican American) for lead SNPs at novel T2D susceptibility loci identified through fixed-effects trans-ethnic GWAS meta-analysis of 26,488 cases and 83,964 controls.**

| Locus               | Lead SNP   | Chr | Build 36 position (bp) | Alleles |       | European<br>12,171 cases and 56,862 controls |                  |         | East Asian<br>6,952 cases and 11,865 controls |                  |         | South Asian<br>5,561 cases and 14,458 controls |                  |         | Mexican and Mexican American<br>1,804 cases and 779 controls |                  |         | Stage 1 trans-ethnic<br>meta-analysis |             |
|---------------------|------------|-----|------------------------|---------|-------|----------------------------------------------|------------------|---------|-----------------------------------------------|------------------|---------|------------------------------------------------|------------------|---------|--------------------------------------------------------------|------------------|---------|---------------------------------------|-------------|
|                     |            |     |                        | Risk    | Other | RAF                                          | OR (95% CI)      | p-value | RAF                                           | OR (95% CI)      | p-value | RAF                                            | OR (95% CI)      | p-value | RAF                                                          | OR (95% CI)      | p-value | p-value                               | Cochran's Q |
| <i>TMEM154</i>      | rs6813195  | 4   | 153,739,925            | C       | T     | 0.71                                         | 1.08 (1.04-1.12) | 1.4E-04 | 0.39                                          | 1.10 (1.05-1.15) | 1.1E-04 | 0.62                                           | 1.05 (1.00-1.11) | 3.4E-02 | 0.63                                                         | 1.11 (0.96-1.28) | 1.6E-01 | 4.2E-09                               | 6.8E-01     |
| <i>POU5F1/TCF19</i> | rs3132524  | 6   | 31,244,693             | C       | T     | 0.73                                         | 1.08 (1.04-1.12) | 1.1E-04 | 0.43                                          | 1.03 (0.98-1.09) | 2.0E-01 | 0.70                                           | 1.08 (1.03-1.14) | 2.5E-03 | 0.76                                                         | 1.19 (1.01-1.40) | 3.7E-02 | 2.5E-07                               | 3.2E-01     |
| <i>ARL15</i>        | rs702634   | 5   | 53,307,177             | A       | G     | 0.67                                         | 1.08 (1.04-1.12) | 4.3E-05 | 0.75                                          | 1.10 (1.00-1.20) | 4.2E-02 | 0.77                                           | 1.07 (1.01-1.13) | 2.4E-02 | 0.86                                                         | 1.06 (0.87-1.29) | 5.5E-01 | 3.4E-07                               | 9.7E-01     |
| <i>SSR1/RREB1</i>   | rs9502570  | 6   | 7,203,616              | C       | T     | 0.73                                         | 1.08 (1.03-1.12) | 1.1E-03 | 0.35                                          | 1.05 (1.00-1.11) | 7.0E-02 | 0.61                                           | 1.09 (1.04-1.14) | 5.1E-04 | 0.75                                                         | 1.03 (0.85-1.21) | 7.5E-01 | 5.7E-07                               | 7.7E-01     |
| <i>MPHOSPH9</i>     | rs1727313  | 12  | 122,206,806            | G       | C     | 0.78                                         | 1.07 (1.03-1.12) | 9.4E-04 | 0.53                                          | 1.20 (1.03-1.41) | 2.1E-02 | 0.74                                           | 1.08 (1.02-1.14) | 4.6E-03 | 0.77                                                         | 1.10 (0.93-1.30) | 2.5E-01 | 1.2E-06                               | 5.9E-01     |
| <i>FAF1</i>         | rs17106184 | 1   | 50,682,573             | G       | A     | 0.91                                         | 1.10 (1.04-1.16) | 1.8E-03 | 0.58                                          | 1.14 (1.05-1.22) | 2.7E-03 | 0.94                                           | 1.08 (0.98-1.19) | 1.3E-01 | 0.95                                                         | 1.36 (1.06-1.66) | 4.7E-02 | 1.9E-06                               | 5.2E-01     |
| <i>LPP</i>          | rs6808574  | 3   | 189,223,217            | C       | T     | 0.60                                         | 1.08 (1.03-1.12) | 2.6E-04 | 0.98                                          | 1.13 (0.85-1.51) | 4.1E-01 | 0.76                                           | 1.05 (0.99-1.10) | 1.1E-01 | 0.82                                                         | 1.49 (1.23-1.80) | 3.4E-05 | 4.3E-06                               | 5.5E-03     |



**Supplementary Table 7. Association summary statistics from the European ancestry validation meta-analysis, stratified according to covariate adjustment: (i) studies that account only for age, sex (unless male- or female-specific), and population structure where necessary (11,327 cases and 31,342 controls); and (ii) all other studies (10,164 cases and 24,305 controls).**

| Locus               | Lead SNP   | Chr | Build 36 position (bp) | Alleles <sup>a</sup> |       | Studies adjusting for age, sex and population structure |         | Other studies    |         | Cochran's Q statistic p-value |
|---------------------|------------|-----|------------------------|----------------------|-------|---------------------------------------------------------|---------|------------------|---------|-------------------------------|
|                     |            |     |                        | Risk                 | Other | OR (95% CI)                                             | p-value | OR (95% CI)      | p-value |                               |
| <i>TMEM154</i>      | rs6813195  | 4   | 153,739,925            | C                    | T     | 1.08 (1.04-1.12)                                        | 1.4E-04 | 1.08 (1.03-1.12) | 1.1E-03 | 8.6E-01                       |
| <i>SSR1/RREB1</i>   | rs9505118  | 6   | 7,235,436              | A                    | G     | 1.07 (1.03-1.10)                                        | 6.2E-04 | 1.04 (1.01-1.08) | 3.6E-02 | 4.0E-01                       |
| <i>FAF1</i>         | rs17106184 | 1   | 50,682,573             | G                    | A     | 1.06 (0.99-1.12)                                        | 1.2E-01 | 1.14 (1.07-1.20) | 1.5E-04 | 7.9E-02                       |
| <i>POU5F1/TCF19</i> | rs3130501  | 6   | 31,244,432             | G                    | A     | 1.06 (1.02-1.10)                                        | 7.0E-03 | 1.06 (1.01-1.11) | 1.8E-02 | 9.6E-01                       |
| <i>LPP</i>          | rs6808574  | 3   | 189,223,217            | C                    | T     | 1.06 (1.02-1.10)                                        | 8.6E-03 | 1.06 (1.02-1.10) | 4.2E-03 | 8.9E-01                       |
| <i>ARL15</i>        | rs702634   | 5   | 53,307,177             | A                    | G     | 1.03 (0.99-1.07)                                        | 1.7E-01 | 1.08 (1.04-1.12) | 5.1E-04 | 7.5E-02                       |
| <i>MPHOSPH9</i>     | rs4275659  | 12  | 122,013,881            | C                    | T     | 1.07 (1.03-1.11)                                        | 5.7E-04 | 1.04 (1.00-1.08) | 9.8E-02 | 2.3E-01                       |

**Supplementary Table 8. T2D association summary statistics for lead SNPs at T1D susceptibility loci identified through fixed-effects trans-ethnic GWAS meta-analysis of 26,488 cases and 83,964 controls.**

| Locus          | T1D lead SNP | Chr | Build 36 position (bp) | Alleles  |       | T2D association  |         |
|----------------|--------------|-----|------------------------|----------|-------|------------------|---------|
|                |              |     |                        | T1D risk | Other | OR (95% CI)      | p-value |
| <i>GLIS3</i>   | rs10758593   | 9   | 4,282,083              | A        | G     | 1.07 (1.04-1.10) | 5.1E-07 |
| 6q22.32        | rs9388489    | 6   | 126,740,412            | G        | A     | 1.06 (1.03-1.08) | 9.8E-05 |
| 16q23.1        | rs7202877    | 16  | 73,804,746             | G        | T     | 0.93 (0.89-0.97) | 5.7E-04 |
| 7p12.1         | rs4948088    | 7   | 50,994,688             |          |       |                  | 1.5E-02 |
| <i>LMO7</i>    | rs539514     | 13  | 75,224,283             | T        | A     | 0.97 (0.95-1.00) | 8.8E-02 |
| 10q23.31       | rs10509540   | 10  | 90,013,013             | T        | C     | 0.98 (0.95-1.00) | 9.3E-02 |
| 14q24.1        | rs1465788    | 14  | 68,333,352             | C        | T     | 1.02 (1.00-1.05) | 9.4E-02 |
| <i>IL2RA</i>   | rs12251307   | 10  | 6,163,501              | C        | T     | 1.02 (0.99-1.06) | 1.3E-01 |
| <i>IL2</i>     | rs4505848    | 4   | 123,351,942            | G        | A     | 1.02 (0.99-1.05) | 1.8E-01 |
| <i>PRKCQ</i>   | rs11258747   | 10  | 6,512,897              | T        | G     | 0.98 (0.95-1.01) | 2.0E-01 |
| <i>AFF3</i>    | rs9653442    | 2   | 100,191,799            | C        | T     | 1.01 (0.99-1.04) | 2.6E-01 |
| <i>IL27</i>    | rs4788084    | 16  | 28,447,349             | C        | T     | 0.98 (0.96-1.01) | 2.6E-01 |
| <i>CYP27B1</i> | rs10877012   | 12  | 56,448,352             |          |       |                  | 3.0E-01 |
| <i>INS</i>     | rs3741208    | 11  | 2,126,350              | A        | G     | 0.98 (0.95-1.02) | 3.1E-01 |
| <i>STAT4</i>   | rs7574865    | 2   | 191,672,878            | T        | G     | 1.01 (0.99-1.04) | 3.1E-01 |
| <i>BACH2</i>   | rs3757247    | 6   | 91,014,184             | T        | C     | 0.99 (0.96-1.01) | 3.3E-01 |
| <i>ORMDL3</i>  | rs2290400    | 17  | 35,319,766             | C        | T     | 0.99 (0.96-1.02) | 3.3E-01 |
| <i>HLA</i>     | rs9268645    | 6   | 32,516,505             | G        | C     | 1.01 (0.99-1.04) | 3.3E-01 |
| 19q13.32       | rs425105     | 19  | 51,900,321             | T        | C     | 0.98 (0.95-1.02) | 3.8E-01 |
| 12q13.2        | rs1701704    | 12  | 54,698,754             | G        | T     | 0.99 (0.96-1.02) | 3.8E-01 |
| 14q32.2        | rs4900384    | 14  | 97,568,704             | G        | A     | 1.01 (0.99-1.04) | 4.1E-01 |
| <i>RGS1</i>    | rs2816316    | 1   | 190,803,436            | A        | C     | 1.01 (0.98-1.05) | 4.1E-01 |
| <i>PTPN22</i>  | rs2476601    | 1   | 114,179,091            | A        | G     | 1.02 (0.97-1.08) | 4.2E-01 |
| <i>RASGRP1</i> | rs17574546   | 15  | 36,689,768             | C        | A     | 1.01 (0.98-1.05) | 4.2E-01 |
| <i>CTLA4</i>   | rs3087243    | 2   | 204,447,164            | G        | A     | 0.99 (0.97-1.02) | 4.6E-01 |
| <i>GPR183</i>  | rs9585056    | 13  | 98,879,767             | C        | T     | 0.99 (0.96-1.02) | 4.7E-01 |
| <i>DLK1</i>    | rs941576     | 14  | 100,375,798            | A        | G     | 1.01 (0.98-1.04) | 4.8E-01 |
| 4p15.2         | rs10517086   | 4   | 25,694,609             | A        | G     | 1.01 (0.98-1.05) | 4.8E-01 |
| <i>SKAP2</i>   | rs7804356    | 7   | 26,858,190             | T        | C     | 1.01 (0.98-1.04) | 5.2E-01 |
| <i>CD226</i>   | rs763361     | 18  | 65,682,622             | T        | C     | 1.01 (0.98-1.03) | 5.7E-01 |
| <i>IFIH1</i>   | rs1990760    | 2   | 162,832,297            | T        | C     | 0.99 (0.97-1.02) | 5.9E-01 |
| <i>IL10</i>    | rs3024505    | 1   | 205,006,527            | G        | A     | 0.99 (0.95-1.03) | 6.1E-01 |
| 22q12.2        | rs5753037    | 22  | 28,911,722             | T        | C     | 1.01 (0.98-1.03) | 6.4E-01 |
| <i>PTPN2</i>   | rs478582     | 18  | 12,825,976             | T        | C     | 0.99 (0.97-1.02) | 6.5E-01 |
| <i>TNFAIP3</i> | rs10499194   | 6   | 138,044,330            | C        | T     | 0.99 (0.96-1.02) | 6.6E-01 |
| 15q25.1        | rs3825932    | 15  | 77,022,501             | C        | T     | 0.99 (0.97-1.02) | 6.7E-01 |
| <i>SH2B3</i>   | rs3184504    | 12  | 110,368,991            | T        | C     | 1.01 (0.97-1.04) | 7.0E-01 |
| <i>EFR3B</i>   | rs478222     | 2   | 25,155,259             | A        | T     | 1.00 (0.98-1.03) | 7.1E-01 |
| 20p13          | rs2281808    | 20  | 1,558,551              | C        | T     | 0.99 (0.97-1.02) | 7.2E-01 |
| 12p13.31       | rs4763879    | 12  | 9,801,431              | A        | G     | 1.00 (0.98-1.03) | 7.5E-01 |
| 6q27           | rs924043     | 6   | 170,220,950            | C        | T     | 1.00 (0.96-1.03) | 7.6E-01 |
| <i>TAGAP</i>   | rs1738074    | 6   | 159,385,965            | C        | T     | 1.00 (0.97-1.02) | 8.2E-01 |
| 17q21.2        | rs7221109    | 17  | 36,023,812             | C        | T     | 1.00 (0.98-1.03) | 8.5E-01 |
| <i>UBASH3A</i> | rs9976767    | 21  | 42,709,459             | G        | A     | 1.00 (0.98-1.03) | 8.5E-01 |
| <i>TYK2</i>    | rs2304256    | 19  | 10,336,652             |          |       |                  | 9.7E-01 |
| <i>IL2RB</i>   | rs229541     | 22  | 35,921,264             | A        | G     | 1.00 (0.98-1.02) | 9.7E-01 |
| <i>CCRS</i>    | rs11711054   | 3   | 46,320,615             | G        | A     | 1.00 (0.97-1.03) | 9.7E-01 |
| 16p13.13       | rs2903692    | 16  | 11,146,284             | G        | A     | 1.00 (0.97-1.03) | 9.7E-01 |

**Supplementary Table 9. Association summary statistics for lead SNPs at novel T2D susceptibility loci in a meta-analysis of glycaemic traits in non-diabetic individuals of European descent from the MAGIC Investigators.**

**(a) Fasting glucose (FG) and fasting glucose adjusted for body-mass index (FGadjBMI) in up to 133,010 individuals.**

| Locus               | Lead SNP   | Chr | Build 36 position (bp) | Alleles |       | FG      |         |        |         | FGadjBMI |         |        |         |
|---------------------|------------|-----|------------------------|---------|-------|---------|---------|--------|---------|----------|---------|--------|---------|
|                     |            |     |                        | Risk    | Other | N       | $\beta$ | SE     | p-value | N        | $\beta$ | SE     | p-value |
| <i>TMEM154</i>      | rs6813195  | 4   | 153,739,925            | C       | T     | 131,758 | -0.0015 | 0.0023 | 5.3E-01 | 123,101  | -0.0045 | 0.0024 | 6.1E-02 |
| <i>SSR1/RREB1</i>   | rs9505118  | 6   | 7,235,436              | A       | G     | 132,932 | 0.0091  | 0.0021 | 1.0E-05 | 123,203  | 0.0084  | 0.0022 | 1.2E-04 |
| <i>FAF1</i>         | rs17106184 | 1   | 50,682,573             | G       | A     | 133,005 | 0.0089  | 0.0036 | 1.4E-02 | 123,259  | 0.0072  | 0.0038 | 6.0E-02 |
| <i>POU5F1/TCF19</i> | rs3130501  | 6   | 31,244,432             | G       | A     | 131,862 | 0.0001  | 0.0024 | 9.7E-01 | 123,243  | 0.0005  | 0.0025 | 8.3E-01 |
| <i>LPP</i>          | rs6808574  | 3   | 189,223,217            | C       | T     | 115,536 | 0.0113  | 0.0023 | 8.6E-07 | 107,010  | 0.0114  | 0.0024 | 2.5E-06 |
| <i>ARL15</i>        | rs702634   | 5   | 53,307,177             | A       | G     | 127,759 | 0.0041  | 0.0022 | 6.4E-02 | 117,917  | 0.0049  | 0.0023 | 3.7E-02 |
| <i>MPHOSPH9</i>     | rs4275659  | 12  | 122,013,881            | C       | T     | 132,968 | -0.0030 | 0.0022 | 1.8E-01 | 123,216  | -0.0022 | 0.0023 | 3.5E-01 |

**(b) Fasting insulin (FI) and fasting insulin adjusted for body-mass index (FIadjBMI) in up to 108,557 individuals.**

| Locus               | Lead SNP   | Chr | Build 36 position (bp) | Alleles |       | FI      |         |        |         | FIadjBMI |         |        |         |
|---------------------|------------|-----|------------------------|---------|-------|---------|---------|--------|---------|----------|---------|--------|---------|
|                     |            |     |                        | Risk    | Other | N       | $\beta$ | SE     | p-value | N        | $\beta$ | SE     | p-value |
| <i>TMEM154</i>      | rs6813195  | 4   | 153,739,925            | C       | T     | 107,414 | -0.0048 | 0.0027 | 7.4E-02 | 103,342  | -0.0036 | 0.0023 | 1.1E-01 |
| <i>SSR1/RREB1</i>   | rs9505118  | 6   | 7,235,436              | A       | G     | 108,480 | -0.0022 | 0.0024 | 3.6E-01 | 103,434  | -0.0007 | 0.0021 | 7.4E-01 |
| <i>FAF1</i>         | rs17106184 | 1   | 50,682,573             | G       | A     | 108,555 | 0.0031  | 0.0042 | 4.7E-01 | 103,492  | 0.0008  | 0.0037 | 8.3E-01 |
| <i>POU5F1/TCF19</i> | rs3130501  | 6   | 31,244,432             | G       | A     | 107,507 | 0.0021  | 0.0027 | 4.4E-01 | 103,473  | 0.0050  | 0.0024 | 3.2E-02 |
| <i>LPP</i>          | rs6808574  | 3   | 189,223,217            | C       | T     | 93,485  | -0.0023 | 0.0027 | 3.9E-01 | 89,488   | 0.0000  | 0.0023 | 1.0E+00 |
| <i>ARL15</i>        | rs702634   | 5   | 53,307,177             | A       | G     | 103,440 | 0.0140  | 0.0026 | 4.5E-08 | 98,281   | 0.0151  | 0.0022 | 5.0E-12 |
| <i>MPHOSPH9</i>     | rs4275659  | 12  | 122,013,881            | C       | T     | 108,549 | 0.0039  | 0.0026 | 1.3E-01 | 103,480  | 0.0040  | 0.0022 | 7.2E-02 |

(c) Homeostatic model of assessment indices of beta-cell function (HOMA-B) and insulin resistance (HOMA-IR) in up to 37,037 individuals.

| Locus               | Lead SNP   | Chr | Build 36 position (bp) | Alleles |       | HOMA-B   |         |        |                 | HOMA-IR  |         |        |                 |
|---------------------|------------|-----|------------------------|---------|-------|----------|---------|--------|-----------------|----------|---------|--------|-----------------|
|                     |            |     |                        | Risk    | Other | <i>N</i> | $\beta$ | SE     | <i>p</i> -value | <i>N</i> | $\beta$ | SE     | <i>p</i> -value |
| <i>TMEM154</i>      | rs6813195  | 4   | 153,739,925            | C       | T     | 35,361   | -0.0024 | 0.0038 | 5.4E-01         | 35,827   | -0.0052 | 0.0047 | 2.6E-01         |
| <i>SSR1/RREB1</i>   | rs9505118  | 6   | 7,235,436              | A       | G     | 36,439   | -0.0052 | 0.0033 | 1.1E-01         | 37,010   | -0.0020 | 0.0040 | 6.2E-01         |
| <i>FAF1</i>         | rs17106184 | 1   | 50,682,573             | G       | A     | 36,466   | -0.0082 | 0.0060 | 1.7E-01         | 37,037   | -0.0042 | 0.0070 | 5.5E-01         |
| <i>POU5F1/TCF19</i> | rs3130501  | 6   | 31,244,432             | G       | A     | 35,437   | -0.0017 | 0.0038 | 6.5E-01         | 35,903   | -0.0012 | 0.0046 | 7.9E-01         |
| <i>LPP</i>          | rs6808574  | 3   | 189,223,217            | C       | T     | 35,428   | -0.0086 | 0.0034 | 1.1E-02         | 35,894   | -0.0021 | 0.0041 | 6.1E-01         |
| <i>ARL15</i>        | rs702634   | 5   | 53,307,177             | A       | G     | 36,449   | 0.0060  | 0.0035 | 8.7E-02         | 37,020   | 0.0099  | 0.0043 | 2.1E-02         |
| <i>MPHOSPH9</i>     | rs4275659  | 12  | 122,013,881            | C       | T     | 36,459   | 0.0038  | 0.0036 | 2.9E-01         | 37,030   | -0.0024 | 0.0044 | 5.9E-01         |

**Supplementary Table 10. Association summary statistics for lead SNPs at novel T2D susceptibility loci in a meta-analysis of body-mass index (BMI) and waist-hip ratio adjusted for body-mass index (WHRadjBMI) in up to 123,865 and 77,167 individuals, respectively, of European ancestry from the GIANT Consortium.**

| Locus               | Lead SNP   | Chr | Build 36 position (bp) | Alleles |       | BMI     |         |        |         | WHRadjBMI |         |        |         |
|---------------------|------------|-----|------------------------|---------|-------|---------|---------|--------|---------|-----------|---------|--------|---------|
|                     |            |     |                        | Risk    | Other | N       | $\beta$ | SE     | p-value | N         | $\beta$ | SE     | p-value |
| <i>TMEM154</i>      | rs6813195  | 4   | 153,739,925            | C       | T     | 123,768 | -0.0057 | 0.0054 | 2.9E-01 | 77,077    | 0.0048  | 0.0052 | 3.9E-01 |
| <i>SSR1/RREB1</i>   | rs9505118  | 6   | 7,235,436              | A       | G     | 123,744 | -0.0017 | 0.0047 | 7.2E-01 | 77,048    | -0.0111 | 0.0046 | 2.1E-02 |
| <i>FAF1</i>         | rs17106184 | 1   | 50,682,573             | G       | A     | 123,778 | -0.0171 | 0.0080 | 3.4E-02 | 77,159    | 0.0136  | 0.0078 | 9.7E-02 |
| <i>POU5F1/TCF19</i> | rs3130501  | 6   | 31,244,432             | G       | A     | 123,830 | -0.0133 | 0.0053 | 1.3E-02 | 77,152    | 0.0065  | 0.0052 | 2.3E-01 |
| <i>LPP</i>          | rs6808574  | 3   | 189,223,217            | C       | T     | 123,829 | 0.0095  | 0.0048 | 4.9E-02 | 77,162    | 0.0120  | 0.0047 | 1.4E-02 |
| <i>ARL15</i>        | rs702634   | 5   | 53,307,177             | A       | G     | 123,791 | -0.0205 | 0.0051 | 5.6E-05 | 77,100    | -0.0041 | 0.0049 | 4.2E-01 |
| <i>MPHOSPH9</i>     | rs4275659  | 12  | 122,013,881            | C       | T     | 123,839 | -0.0129 | 0.0052 | 1.3E-02 | 77,149    | 0.0012  | 0.0050 | 8.1E-01 |

**Supplementary Table 11. Association summary statistics for lead SNPs at novel T2D susceptibility loci in a meta-analysis of lipid traits in up to 100,184 individuals of European ancestry from the Global Lipids Genetics Consortium.**

| Locus               | Lead SNP   | Chr | Build 36 position (bp) | Alleles |       | Total cholesterol |         |         | High-density lipoprotein |         |         | Low-density lipoprotein |         |         | Triglycerides |         |         |
|---------------------|------------|-----|------------------------|---------|-------|-------------------|---------|---------|--------------------------|---------|---------|-------------------------|---------|---------|---------------|---------|---------|
|                     |            |     |                        | Risk    | Other | N                 | Z-score | p-value | N                        | Z-score | p-value | N                       | Z-score | p-value | N             | Z-score | p-value |
| <i>TMEM154</i>      | rs6813195  | 4   | 153,739,925            | C       | T     | 100,065           | -0.114  | 9.1E-01 | 99,787                   | -1.271  | 2.0E-01 | 95,341                  | -0.159  | 8.7E-01 | 96,479        | 0.033   | 9.7E-01 |
| <i>SSR1/RREB1</i>   | rs9505118  | 6   | 7,235,436              | A       | G     | 100,117           | -0.147  | 8.8E-01 | 99,832                   | 0.147   | 8.8E-01 | 95,389                  | -0.427  | 6.7E-01 | 96,530        | 0.450   | 6.5E-01 |
| <i>FAF1</i>         | rs17106184 | 1   | 50,682,573             | G       | A     | 100,183           | 1.399   | 1.6E-01 | 99,899                   | 0.087   | 9.3E-01 | 95,454                  | 0.306   | 7.6E-01 | 96,597        | 2.007   | 4.5E-02 |
| <i>POU5F1/TCF19</i> | rs3130501  | 6   | 31,244,432             | G       | A     | 97,134            | 4.160   | 3.2E-05 | 96,895                   | 0.857   | 3.9E-01 | 92,490                  | 2.592   | 9.5E-03 | 93,548        | 3.140   | 1.7E-03 |
| <i>LPP</i>          | rs6808574  | 3   | 189,223,217            | C       | T     | 100,184           | -0.008  | 9.9E-01 | 99,900                   | -0.788  | 4.3E-01 | 95,454                  | 0.273   | 7.9E-01 | 96,598        | -0.076  | 9.4E-01 |
| <i>ARL15</i>        | rs702634   | 5   | 53,307,177             | A       | G     | 100,115           | 1.299   | 1.9E-01 | 99,837                   | -2.287  | 2.2E-02 | 95,391                  | 0.762   | 4.5E-01 | 96,529        | 2.563   | 1.0E-02 |
| <i>MPHOSPH9</i>     | rs4275659  | 12  | 122,013,881            | C       | T     | 100,159           | -1.756  | 7.9E-02 | 99,877                   | -1.820  | 6.9E-02 | 95,431                  | -1.167  | 2.4E-01 | 96,573        | 0.995   | 3.2E-01 |

**Supplementary Table 12. Evidence for *cis*-eQTL expression with lead T2D SNPs at novel T2D susceptibility loci in multiple tissues from public databases and unpublished resources.**

| Locus               | Lead SNP  | Chr | Build 36 position (bp) | Transcript        | Tissue          | <i>p</i> -value | Lead <i>cis</i> -eQTL SNP |     |                        |           |               |                 |
|---------------------|-----------|-----|------------------------|-------------------|-----------------|-----------------|---------------------------|-----|------------------------|-----------|---------------|-----------------|
|                     |           |     |                        |                   |                 |                 | SNP                       | Chr | Build 36 position (bp) | CEU $r^2$ | CHB+JPT $r^2$ | <i>p</i> -value |
| <i>SSR1/RREB1</i>   | rs9505118 | 6   | 7,235,436              | <i>SSR1</i>       | B cells (CD19+) | 2.2E-06         | rs1050226                 | 6   | 7,226,653              | 0.965     | 1.000         | 2.1E-06         |
| <i>POU5F1/TCF19</i> | rs3130501 | 6   | 31,244,432             | <i>HCG27</i>      | Blood           | 8.8E-20         | rs9263871                 | 6   | 31,278,507             | 0.028     | 0.545         | 5.2E-62         |
|                     |           |     |                        | <i>HCG22</i>      | LCL             | 1.9E-16         | rs2517552                 | 6   | 31,115,569             | 0.426     | 0.000         | 2.9E-34         |
|                     |           |     |                        | <i>AL662833.4</i> | Lymph           | 2.6E-06         | rs1265112                 | 6   | 31,225,998             | 0.207     | 0.042         | 5.3E-29         |
|                     |           |     |                        | <i>HCG27</i>      | Monocytes       | 1.3E-69         | Same SNP                  |     |                        |           |               |                 |
|                     |           |     |                        | <i>HLA-DRB5</i>   | Monocytes       | 1.7E-33         | rs3129868                 | 6   | 32,278,507             | N/A       | N/A           | 1.0E-320        |
|                     |           |     |                        | <i>HLA-C</i>      | Monocytes       | 7.5E-15         | rs4394274                 | 6   | 31,426,143             | N/A       | N/A           | 2.6E-158        |
|                     |           |     |                        | <i>HLA-DRB1</i>   | Monocytes       | 8.3E-15         | rs2395166                 | 6   | 32,496,253             | N/A       | N/A           | 4.0E-192        |
| <i>MPHOSPH9</i>     | rs4275659 | 12  | 122,013,881            | <i>ABCB9</i>      | Liver           | 7.4E-12         | Same SNP                  |     |                        |           |               |                 |
|                     |           |     |                        | <i>SETD8</i>      | Lung            | 2.0E-16         | Same SNP                  |     |                        |           |               |                 |

**Supplementary Table 13. Potential functional variants in pilot data from the 1000 Genomes Project that are in strong LD (CEU and CHB+JPT  $r^2 > 0.8$ ) with the lead SNPs in the novel susceptibility loci.**

| Locus               | Lead SNP  | Chr | Build 36 position (bp) | Functional proxy SNP |     |                        |           |               |                |            |
|---------------------|-----------|-----|------------------------|----------------------|-----|------------------------|-----------|---------------|----------------|------------|
|                     |           |     |                        | SNP                  | Chr | Build 36 position (bp) | CEU $r^2$ | CHB+JPT $r^2$ | Gene           | Annotation |
| <i>SSR1/RREB1</i>   | rs9505118 | 6   | 7,235,436              | rs1050226            | 6   | 7,226,653              | 0.97      | 0.93          | <i>SSR1</i>    | 3'-UTR     |
|                     |           |     |                        | rs8955               | 6   | 7,233,296              | 1.00      | 1.00          | <i>SSR1</i>    | 3'-UTR     |
|                     |           |     |                        | rs11071              | 6   | 7,233,543              | 1.00      | 0.94          | <i>SSR1</i>    | 3'-UTR     |
|                     |           |     |                        | rs3087986            | 6   | 7,234,165              | 1.00      | 1.00          | <i>SSR1</i>    | 3'-UTR     |
| <i>POU5F1/TCF19</i> | rs3130501 | 6   | 31,244,432             | rs113581344          | 6   | 31,237,595             | 0.96      | 0.80          | <i>TCF19</i>   | Missense   |
| <i>MPHOSPH9</i>     | rs4275659 | 12  | 122,013,881            | rs61955196           | 12  | 122,016,971            | 0.92      | 1.00          | <i>ABCB9</i>   | 5'-UTR     |
|                     |           |     |                        | rs3759115            | 12  | 122,030,232            | 0.92      | 0.97          | <i>OGFOD2</i>  | 3'-UTR     |
|                     |           |     |                        | rs3741530            | 12  | 122,035,600            | 0.92      | 0.81          | <i>PITPNM2</i> | 3'-UTR     |



**Supplementary Table 14. Properties of the 99% credible set at ten established T2D susceptibility loci as a function of SNP quality on the basis of association summary statistics from the trans-ethnic meta-analysis of European, East Asian, South Asian and Mexican American ancestry GWAS (26,488 cases and 83,964 controls) for three subsets of variants: (i) all SNPs; (ii) SNPs reported in at least 80% ( $N=88,361$ ) individuals; and (iii) SNPs reported in at least 90% ( $N=99,406$ ) individuals.**

| Locus           | Chr | 99% credible set:<br>all SNPs |               |                         | 99% credible set:<br>SNPs reported for $\geq 80\%$ of individuals |               |                         | 99% credible set:<br>SNPs reported for $\geq 90\%$ of individuals |               |                         |
|-----------------|-----|-------------------------------|---------------|-------------------------|-------------------------------------------------------------------|---------------|-------------------------|-------------------------------------------------------------------|---------------|-------------------------|
|                 |     | SNPs                          | Interval (bp) | Build 36 location (bp)  | SNPs                                                              | Interval (bp) | Build 36 location (bp)  | SNPs                                                              | Interval (bp) | Build 36 location (bp)  |
| <i>JAZF1</i>    | 7   | 4                             | 15,667        | 28,147,081-28,162,747   | 4                                                                 | 15,667        | 28,147,081-28,162,747   | 4                                                                 | 15,667        | 28,147,081-28,162,747   |
| <i>SLC30A8</i>  | 8   | 2                             | 243           | 118,253,964-118,254,206 | 2                                                                 | 243           | 118,253,964-118,254,206 | 2                                                                 | 243           | 118,253,964-118,254,206 |
| <i>CDKAL1</i>   | 6   | 2                             | 1,549         | 20,794,552-20,796,100   | 2                                                                 | 1,549         | 20,794,552-20,796,100   | 2                                                                 | 1,549         | 20,794,552-20,796,100   |
| <i>HHEX/IDE</i> | 10  | 2                             | 937           | 94,455,539-94,456,475   | 2                                                                 | 937           | 94,455,539-94,456,475   | 2                                                                 | 937           | 94,455,539-94,456,475   |
| <i>TCF7L2</i>   | 10  | 2                             | 2,309         | 114,746,031-114,748,339 | 2                                                                 | 2,309         | 114,746,031-114,748,339 | 2                                                                 | 2,309         | 114,746,031-114,748,339 |
| <i>IGF2BP2</i>  | 3   | 12                            | 24,504        | 186,988,481-187,012,984 | 12                                                                | 24,504        | 186,988,481-187,012,984 | 12                                                                | 24,504        | 186,988,481-187,012,984 |
| <i>FTO</i>      | 16  | 10                            | 39,335        | 52,361,075-52,400,409   | 10                                                                | 39,335        | 52,361,075-52,400,409   | 10                                                                | 39,335        | 52,361,075-52,400,409   |
| <i>CDKN2A/B</i> | 9   | 1                             | 1             | 22,122,076-22,122,076   | 1                                                                 | 1             | 22,122,076-22,122,076   | 1                                                                 | 1             | 22,122,076-22,122,076   |
| <i>PPARG</i>    | 3   | 21                            | 265,269       | 12,106,687-12,371,955   | 21                                                                | 265,269       | 12,106,687-12,371,955   | 17                                                                | 265,269       | 12,106,687-12,371,955   |
| <i>MTNR1B</i>   | 11  | 15                            | 55,032        | 92,307,378-92,362,409   | 13                                                                | 55,032        | 92,307,378-92,362,409   | 7                                                                 | 55,032        | 92,307,378-92,362,409   |

# **Genome-wide trans-ethnic meta-analysis reveals novel insights into the genetic architecture of type 2 diabetes susceptibility**

**DIAbetes Genetics Replication And Meta-analysis (DIAGRAM) Consortium, Asian Genetic Epidemiology Network Type 2 Diabetes (AGEN-T2D) Consortium, South Asian Type 2 Diabetes (SAT2D) Consortium, Mexican American Type 2 Diabetes (MAT2D) Consortium and Type 2 Diabetes Genetic Exploration by Next-generation sequencing in multi-Ethnic Samples (T2D-GENES) Consortium**

**SUPPLEMENTARY NOTE**

## Membership of the DIAbetes Genetics Replication And Meta-analysis (DIAGRAM) Consortium

As at publication of the European ancestry meta-analysis, August 2012

Andrew P Morris<sup>1</sup>, Benjamin F Voight<sup>2,3</sup>, Tanya M Teslovich<sup>4</sup>, Teresa Ferreira<sup>1</sup>, Ayellet V Segre<sup>2,5,6</sup>, Valgerdur Steinthorsdottir<sup>7</sup>, Rona J Strawbridge<sup>8,9</sup>, Hassan Khan<sup>10</sup>, Harald Grallert<sup>11</sup>, Anubha Mahajan<sup>1</sup>, Inga Prokopenko<sup>1,12</sup>, Hyun Min Kang<sup>4</sup>, Christian Dina<sup>13-15</sup>, Tonu Esko<sup>16,17</sup>, Ross M Fraser<sup>18</sup>, Stavroula Kanoni<sup>19</sup>, Ashish Kumar<sup>1</sup>, Vasiliki Lagou<sup>1</sup>, Claudia Langenberg<sup>20</sup>, Jian'an Luan<sup>20</sup>, Cecilia M Lindgren<sup>1</sup>, Martina Müller-Nurasyid<sup>21-23</sup>, Sonali Pechlivanis<sup>24</sup>, N William Rayner<sup>1,12</sup>, Laura J Scott<sup>4</sup>, Steven Wiltshire<sup>1</sup>, Loic Yengo<sup>25,26</sup>, Leena Kinnunen<sup>27</sup>, Elizabeth J Rossin<sup>2,5,28,29</sup>, Soumya Raychaudhuri<sup>2,30,31</sup>, Andrew D Johnson<sup>32</sup>, Antigone S Dimas<sup>1,33,34</sup>, Ruth J F Loos<sup>20,35-37</sup>, Sailaja Vedantam<sup>38,39</sup>, Han Chen<sup>40</sup>, Jose C Florez<sup>5,6,38,41</sup>, Caroline Fox<sup>32,42</sup>, Ching-Ti Liu<sup>40</sup>, Denis Rybin<sup>43</sup>, David J Couper<sup>44</sup>, Wen Hong L Kao<sup>45</sup>, Man Li<sup>45</sup>, Marilyn C Cornelis<sup>46</sup>, Peter Kraft<sup>46,47</sup>, Qi Sun<sup>46,48</sup>, Rob M van Dam<sup>46,49</sup>, Heather M Stringham<sup>4</sup>, Peter S Chines<sup>50</sup>, Krista Fischer<sup>16</sup>, Pierre Fontanillas<sup>2</sup>, Oddgeir L Holmen<sup>51</sup>, Sarah E Hunt<sup>19</sup>, Anne U Jackson<sup>4</sup>, Augustine Kong<sup>7</sup>, Robert Lawrence<sup>52</sup>, Julia Meyer<sup>22</sup>, John R B Perry<sup>1,53</sup>, Carl G P Platou<sup>51,54</sup>, Simon Potter<sup>19</sup>, Emil Rehnberg<sup>55</sup>, Neil Robertson<sup>1,12</sup>, Suthesh Sivapalaratnam<sup>56</sup>, Alena Stančáková<sup>57</sup>, Kathleen Stirrups<sup>19</sup>, Gudmar Thorleifsson<sup>7</sup>, Emmi Tikkanen<sup>58,59</sup>, Andrew R Wood<sup>53</sup>, Peter Almgren<sup>60</sup>, Mustafa Atalay<sup>61</sup>, Rafn Benediktsson<sup>62,63</sup>, Lori L Bonnycastle<sup>50</sup>, Noël Burtt<sup>2</sup>, Jason Carey<sup>2</sup>, Guillaume Charpentier<sup>64</sup>, Andrew T Crenshaw<sup>2</sup>, Alex S F Doney<sup>65,66</sup>, Mozhgan Dorkhan<sup>60</sup>, Sarah Edkins<sup>19</sup>, Valur Emilsson<sup>67</sup>, Elodie Eury<sup>25</sup>, Tom Forsen<sup>68,69</sup>, Karl Gertow<sup>8,9</sup>, Bruna Gigante<sup>70</sup>, George B Grant<sup>2</sup>, Christopher J Groves<sup>12</sup>, Candace Guiducci<sup>2</sup>, Christian Herder<sup>71</sup>, Astradur B Hreidarsson<sup>63</sup>, Jennie Hui<sup>72-75</sup>, Alan James<sup>72,76,77</sup>, Anna Jonsson<sup>60</sup>, Wolfgang Rathmann<sup>78</sup>, Norman Klopp<sup>11</sup>, Jasmina Kravic<sup>60</sup>, Kaarel Krjutškov<sup>16</sup>, Cordelia Langford<sup>19</sup>, Karin Leander<sup>70</sup>, Eero Lindholm<sup>60</sup>, Stéphane Lobbens<sup>25</sup>, Satu Männistö<sup>59</sup>, Ghazala Mirza<sup>1</sup>, Thomas W Mühleisen<sup>79,80</sup>, Bill Musk<sup>72,75,77,81</sup>, Melissa Parkin<sup>2</sup>, Loukianos Rallidis<sup>82</sup>, Jouko Saramies<sup>83</sup>, Bengt Sennblad<sup>8,9</sup>, Sonia Shah<sup>84</sup>, Gunnar Sigurðsson<sup>63,67</sup>, Angela Silveira<sup>8,9</sup>, Gerald Steinbach<sup>85</sup>, Barbara Thorand<sup>86</sup>, Joseph Trakalo<sup>1</sup>, Fabrizio Veglia<sup>87</sup>, Roman Wennauer<sup>85</sup>, Wendy Winckler<sup>2</sup>, Delilah Zabaneh<sup>84</sup>, Harry Campbell<sup>18,88</sup>, Cornelia van Duijn<sup>89,90</sup>, Andre G Uitterlinden<sup>89-91</sup>, Albert Hofman<sup>89</sup>, Eric Sijbrands<sup>91</sup>, Goncalo R Abecasis<sup>4</sup>, Katharine R Owen<sup>12,92</sup>, Eleftheria Zeggini<sup>19</sup>, Mieke D Trip<sup>56</sup>, Nita G Forouhi<sup>20</sup>, Ann-Christine Syvänen<sup>93</sup>, Johan G Eriksson<sup>59,68,94,95</sup>, Leena Peltonen<sup>138</sup>, Markus M Nöthen<sup>79,80</sup>, Beverley Balkau<sup>96,97</sup>, Colin N A Palmer<sup>65,66</sup>, Valeriya Lyssenko<sup>60</sup>, Tiinamaija Tuomi<sup>95,98</sup>, Bo Isomaa<sup>95,99</sup>, David J Hunter<sup>46-48</sup>, Lu Qi<sup>46,48</sup>, Alan R Shuldiner<sup>100-102</sup>, Michael Roden<sup>71,103</sup>, Ines Barroso<sup>19,104,105</sup>, Tom Wilsgaard<sup>106</sup>, John Beilby<sup>72-74</sup>, Kees Hovingh<sup>56</sup>, Jackie F Price<sup>18</sup>, James F Wilson<sup>18,88</sup>, Rainer Rauramaa<sup>107,108</sup>, Timo A Lakka<sup>61,107</sup>, Lars Lind<sup>109</sup>, George Dedoussis<sup>110</sup>, Inger Njølstad<sup>106</sup>, Nancy L Pedersen<sup>55</sup>, Kay-Tee Khaw<sup>10</sup>, Nicholas J Wareham<sup>20</sup>, Sirkka M Keinänen-Kiukaanniemi<sup>111,112</sup>, Timo E Saaristo<sup>113,114</sup>, Eeva Korpi-Hyövälti<sup>115</sup>, Juha Saltevo<sup>116</sup>, Markku Laakso<sup>57</sup>, Johanna Kuusisto<sup>57</sup>, Andres Metspalu<sup>16,17</sup>, Francis S Collins<sup>50</sup>, Karen L Mohlke<sup>117</sup>, Richard N Bergman<sup>118</sup>, Jaakko Tuomilehto<sup>27,115,119,120</sup>, Bernhard O Boehm<sup>121</sup>, Christian Gieger<sup>22</sup>, Kristian Hveem<sup>51</sup>, Stephane Cauchi<sup>25</sup>, Philippe Froguel<sup>25,122</sup>, Damiano Baldassarre<sup>87,123</sup>, Elena Tremoli<sup>87,123</sup>, Steve E Humphries<sup>124</sup>, Danish Saleheen<sup>10,125</sup>, John Danesh<sup>10</sup>, Erik Ingelsson<sup>55</sup>, Samuli Ripatti<sup>19,58,59</sup>, Veikko Salomaa<sup>59</sup>, Raimund Erbel<sup>126</sup>, Karl-Heinz Jöckel<sup>24</sup>, Susanne Moebus<sup>24</sup>, Annette Peters<sup>86</sup>, Thomas Illig<sup>11,127</sup>, Ulf de Faire<sup>70</sup>, Anders Hamsten<sup>8,9</sup>, Andrew D Morris<sup>65,66</sup>, Peter J Donnelly<sup>1,128</sup>, Timothy M Frayling<sup>53</sup>, Andrew T

Hattersley<sup>129</sup>, Eric Boerwinkle<sup>130,131</sup>, Olle Melander<sup>60</sup>, Sekar Kathiresan<sup>2,5,132</sup>, Peter M Nilsson<sup>60</sup>, Panos Deloukas<sup>19</sup>, Unnur Thorsteinsdottir<sup>7,62</sup>, Leif C Groop<sup>60</sup>, Kari Stefansson<sup>7,62</sup>, Frank Hu<sup>46,48</sup>, James S Pankow<sup>133</sup>, Josée Dupuis<sup>32,40</sup>, James B Meigs<sup>6,134</sup>, David Altshuler<sup>2,5,6,135–137</sup>, Michael Boehnke<sup>4</sup>, and Mark I McCarthy<sup>1,12,92</sup>

<sup>1</sup>Wellcome Trust Centre for Human Genetics, University of Oxford, Oxford, UK. <sup>2</sup>Broad Institute of Harvard and Massachusetts Institute of Technology (MIT), Cambridge, Massachusetts, USA. <sup>3</sup>Department of Pharmacology, University of Pennsylvania—Perelman School of Medicine, Philadelphia, Pennsylvania, USA. <sup>4</sup>Department of Biostatistics, University of Michigan, Ann Arbor, Michigan, USA. <sup>5</sup>Center for Human Genetic Research, Massachusetts General Hospital, Boston, Massachusetts, USA. <sup>6</sup>Department of Medicine, Harvard Medical School, Boston, Massachusetts, USA. <sup>7</sup>deCODE Genetics, Reykjavik, Iceland. <sup>8</sup>Atherosclerosis Research Unit, Department of Medicine Solna, Karolinska Institutet, Stockholm, Sweden. <sup>9</sup>Center for Molecular Medicine, Karolinska University Hospital Solna, Stockholm, Sweden. <sup>10</sup>Department of Public Health and Primary Care, University of Cambridge, Cambridge, UK. <sup>11</sup>Research Unit of Molecular Epidemiology, Helmholtz Zentrum Muenchen, Neuherberg, Germany. <sup>12</sup>Oxford Centre for Diabetes, Endocrinology and Metabolism, University of Oxford, Oxford, UK. <sup>13</sup>Institut National de la Santé et de la Recherche Médicale (INSERM) Unité Mixte de Recherche (UMR) 1087, Nantes, France. <sup>14</sup>Centre National de la Recherche Scientifique (CNRS) UMR 6291, Nantes, France. <sup>15</sup>Department of Biology, Medicine and Health, Nantes University, Nantes, France. <sup>16</sup>Estonian Genome Center, University of Tartu, Tartu, Estonia. <sup>17</sup>Institute of Molecular and Cell Biology, University of Tartu, Tartu, Estonia. <sup>18</sup>Centre for Population Health Sciences, University of Edinburgh, Edinburgh, UK. <sup>19</sup>Wellcome Trust Sanger Institute, Hinxton, Cambridge, UK. <sup>20</sup>Medical Research Council (MRC) Epidemiology Unit, Institute of Metabolic Science, Addenbrooke's Hospital, Cambridge, UK. <sup>21</sup>Institute of Medical Informatics, Biometry and Epidemiology, Ludwig-Maximilians-Universität, Munich, Germany. <sup>22</sup>Institute of Genetic Epidemiology, Helmholtz Zentrum Muenchen, Neuherberg, Germany. <sup>23</sup>Department of Medicine I, University Hospital Grosshadern, Ludwig-Maximilians-Universität, Munich, Germany. <sup>24</sup>Institute for Medical Informatics, Biometry and Epidemiology, University Hospital of Essen, University Duisburg-Essen, Essen, Germany. <sup>25</sup>CNRS UMR 8199, Institute of Biology and Lille 2 University, Pasteur Institute, Lille, France. <sup>26</sup>Laboratory of Mathematics, CNRS UMR 8524, University Lille 1, Model for Data Analysis and Learning (MODAL) Team, Institut National de Recherche en Informatique et en Automatique (INRIA) Lille Nord-Europe, Lille, France. <sup>27</sup>Diabetes Prevention Unit, National Institute for Health and Welfare, Helsinki, Finland. <sup>28</sup>Health Science and Technology MD Program, Harvard University and Massachusetts Institute of Technology, Boston, Massachusetts, USA. <sup>29</sup>Harvard Biological and Biomedical Sciences Program, Harvard University, Boston, Massachusetts, USA. <sup>30</sup>Division of Rheumatology, Immunology and Allergy, Brigham and Women's Hospital, Harvard Medical School, Boston, Massachusetts, USA. <sup>31</sup>Partners Center for Personalized Genomic Medicine, Boston, Massachusetts, USA. <sup>32</sup>National Heart, Lung, and Blood Institute's Framingham Heart Study, Framingham, Massachusetts, USA. <sup>33</sup>Department of Genetic Medicine and Development, University of Geneva Medical School, Geneva, Switzerland. <sup>34</sup>Biomedical Sciences Research Center Al Fleming, Vari, Greece. <sup>35</sup>Charles R Bronfman Institute for Personalized Medicine, Mount Sinai School of Medicine, New York, New York, USA. <sup>36</sup>Child Health and Development Institute, Mount Sinai School of Medicine, New York, New York, USA. <sup>37</sup>Department of Preventive Medicine, Mount Sinai School of Medicine, New York, New York, USA. <sup>38</sup>Program in Medical and Population Genetics, Broad Institute of Harvard and MIT, Cambridge, Massachusetts, USA. <sup>39</sup>Division of Genetics and Endocrinology, Children's Hospital, Boston, Massachusetts, USA. <sup>40</sup>Department of Biostatistics, Boston University School of Public Health, Boston, Massachusetts, USA. <sup>41</sup>Diabetes Research Center, Diabetes Unit, Massachusetts General Hospital, Boston, Massachusetts, USA. <sup>42</sup>Division of Endocrinology and Metabolism, Brigham and Women's Hospital and Harvard Medical School, Boston, Massachusetts, USA. <sup>43</sup>Boston University Data Coordinating Center, Boston, Massachusetts, USA. <sup>44</sup>Collaborative Studies Coordinating Center, Department of Biostatistics, University of North Carolina at Chapel Hill, Chapel Hill, North Carolina, USA. <sup>45</sup>Department of Epidemiology, Johns Hopkins Bloomberg School of Public Health, Baltimore, Maryland, USA. <sup>46</sup>Department of Nutrition and Epidemiology, Harvard School of Public Health, Boston, Massachusetts, USA. <sup>47</sup>Program in Molecular and Genetic Epidemiology, Harvard School of Public Health, Boston, Massachusetts, USA. <sup>48</sup>Channing Laboratory, Department of Medicine, Brigham and Women's Hospital and Harvard Medical School, Boston, Massachusetts, USA. <sup>49</sup>Saw Swee Hock School of Public Health, National University of Singapore, Singapore. <sup>50</sup>National Human Genome Research Institute, US National Institutes of Health, Bethesda, Maryland, USA. <sup>51</sup>Nord-Trondelag Health Study (HUNT) Research Centre, Department of Public Health and General Practice, Norwegian University of Science and Technology, Levanger, Norway. <sup>52</sup>Centre for Genetic Epidemiology and Biostatistics, The University of Western Australia,

Nedlands, Western Australia, Australia. <sup>53</sup>Genetics of Complex Traits, Institute of Biomedical and Clinical Science, Peninsula Medical School, University of Exeter, Exeter, UK. <sup>54</sup>Department of Internal Medicine, Levanger Hospital, Nord-Trøndelag Health Trust, Levanger, Norway. <sup>55</sup>Department of Medical Epidemiology and Biostatistics, Karolinska Institutet, Stockholm, Sweden. <sup>56</sup>Department of Vascular Medicine, Academic Medical Center, University of Amsterdam, Amsterdam, The Netherlands. <sup>57</sup>Department of Medicine, University of Eastern Finland and Kuopio University Hospital, Kuopio, Finland. <sup>58</sup>Institute for Molecular Medicine Finland (FIMM), Helsinki, Finland. <sup>59</sup>Department of Chronic Disease Prevention, National Institute for Health and Welfare, Helsinki, Finland. <sup>60</sup>Department of Clinical Science Malmö, Lund University Diabetes Centre, Scania University Hospital, Lund University, Malmö, Sweden. <sup>61</sup>Institute of Biomedicine, Physiology, University of Eastern Finland, Kuopio, Finland. <sup>62</sup>Faculty of Medicine, University of Iceland, Reykjavík, Iceland. <sup>63</sup>Department of Endocrinology and Metabolism, Landspítali University Hospital, Reykjavík, Iceland. <sup>64</sup>Endocrinology-Diabetology Unit, Corbeil-Essonnes Hospital, Corbeil-Essonnes, France. <sup>65</sup>Diabetes Research Centre, Biomedical Research Institute, University of Dundee, Ninewells Hospital, Dundee, UK. <sup>66</sup>Pharmacogenomics Centre, Biomedical Research Institute, University of Dundee, Ninewells Hospital, Dundee, UK. <sup>67</sup>Icelandic Heart Association, Kopavogur, Iceland. <sup>68</sup>Department of General Practice and Primary Health Care, University of Helsinki, Helsinki, Finland. <sup>69</sup>Vaasa Health Care Centre, Vaasa, Finland. <sup>70</sup>Division of Cardiovascular Epidemiology, Institute of Environmental Medicine, Karolinska Institutet, Stockholm, Sweden. <sup>71</sup>Institute for Clinical Diabetology, German Diabetes Center, Leibniz Center for Diabetes Research at Heinrich Heine University Düsseldorf, Düsseldorf, Germany. <sup>72</sup>Busselton Population Medical Research Institute, Sir Charles Gairdner Hospital, Nedlands, Western Australia, Australia. <sup>73</sup>PathWest Laboratory Medicine of Western Australia, Queen Elizabeth II Medical Centre, Nedlands, Western Australia, Australia. <sup>74</sup>School of Pathology and Laboratory Medicine, The University of Western Australia, Nedlands, Western Australia, Australia. <sup>75</sup>School of Population Health, The University of Western Australia, Nedlands, Western Australia, Australia. <sup>76</sup>Department of Pulmonary Physiology and Sleep Medicine, West Australian Sleep Disorders Research Institute, Queen Elizabeth II Medical Centre, Nedlands, Western Australia, Australia. <sup>77</sup>School of Medicine and Pharmacology, University of Western Australia, Nedlands, Western Australia, Australia. <sup>78</sup>Institute of Biometrics and Epidemiology, German Diabetes Center, Leibniz Center for Diabetes Research at Heinrich Heine University Düsseldorf, Düsseldorf, Germany. <sup>79</sup>Institute of Human Genetics, University of Bonn, Bonn, Germany. <sup>80</sup>Department of Genomics, Life & Brain Center, University of Bonn, Bonn, Germany. <sup>81</sup>Respiratory Medicine, Sir Charles Gairdner Hospital, Nedlands, Western Australia, Australia. <sup>82</sup>Department of Cardiology, University General Hospital Attikon, Athens, Greece. <sup>83</sup>South Karelia Central Hospital, Lappeenranta, Finland. <sup>84</sup>Department of Genetics, Evolution and Environment, University College London (UCL) Genetics Institute, University College London, London, UK. <sup>85</sup>Department of Clinical Chemistry and Central Laboratory, University of Ulm, Ulm, Germany. <sup>86</sup>Institute of Epidemiology II, Helmholtz Zentrum Muenchen, Neuherberg, Germany. <sup>87</sup>Centro Cardiologico Monzino, IRCCS, Milan, Italy. <sup>88</sup>MRC Institute of Genetics and Molecular Medicine at the University of Edinburgh, Western General Hospital, Edinburgh, UK. <sup>89</sup>Department of Epidemiology, Erasmus University Medical Center, Rotterdam, The Netherlands. <sup>90</sup>Netherlands Genomics Initiative, Netherlands Consortium for Healthy Ageing and Centre for Medical Systems Biology, Rotterdam, The Netherlands. <sup>91</sup>Department of Internal Medicine, Erasmus University Medical Center, Rotterdam, The Netherlands. <sup>92</sup>Oxford National Institute for Health Research Biomedical Research Centre, Churchill Hospital, Oxford, UK. <sup>93</sup>Molecular Medicine, Department of Medical Sciences, Uppsala University, Uppsala, Sweden. <sup>94</sup>Unit of General Practice, Helsinki University General Hospital, Helsinki, Finland. <sup>95</sup>Folkhälsan Research Center, Helsinki, Finland. <sup>96</sup>INSERM CESP U1018, Villejuif, France. <sup>97</sup>University Paris Sud 11, UMRS 1018, Villejuif, France. <sup>98</sup>Department of Medicine, Helsinki University Hospital, University of Helsinki, Helsinki, Finland. <sup>99</sup>Department of Social Services and Health Care, Jakobstad, Finland. <sup>100</sup>Division of Endocrinology, Diabetes and Nutrition, University of Maryland School of Medicine, Baltimore, Maryland, USA. <sup>101</sup>Geriatric Research Education and Clinical Center, Baltimore Veterans Administration Medical Center, Baltimore, Maryland, USA. <sup>102</sup>Program in Personalized and Genomic Medicine, University of Maryland School of Medicine, Baltimore, Maryland, USA. <sup>103</sup>Department of Medicine/Metabolic Diseases, Heinrich Heine University Düsseldorf, Düsseldorf, Germany. <sup>104</sup>University of Cambridge Metabolic Research Laboratories, Institute of Metabolic Science, Addenbrooke's Hospital, Cambridge, UK. <sup>105</sup>National Institute for Health Research (NIHR) Cambridge Biomedical Research Centre, Institute of Metabolic Science, Addenbrooke's Hospital, Cambridge, UK. <sup>106</sup>Department of Community Medicine, Faculty of Health Sciences, University of Tromsø, Tromsø, Norway. <sup>107</sup>Kuopio Research Institute of Exercise Medicine, Kuopio, Finland. <sup>108</sup>Department of Clinical Physiology and Nuclear Medicine, Kuopio University Hospital, Kuopio, Finland. <sup>109</sup>Department of Medical Sciences, Uppsala University, Akademiska Sjukhuset, Uppsala, Sweden. <sup>110</sup>Department of Dietetics-Nutrition, Harokopio University, Athens, Greece. <sup>111</sup>Faculty of Medicine, Institute of Health Sciences, University of Oulu, Oulu, Finland. <sup>112</sup>Unit of General

Practice, Oulu University Hospital, Oulu, Finland. <sup>113</sup>Finnish Diabetes Association, Tampere, Finland. <sup>114</sup>Pirkanmaa Hospital District, Tampere, Finland. <sup>115</sup>Department of Internal Medicine, South Ostrobothnia Central Hospital, Seinäjoki, Finland. <sup>116</sup>Department of Medicine, Central Finland Central Hospital, Jyväskylä, Finland. <sup>117</sup>Department of Genetics, University of North Carolina at Chapel Hill, Chapel Hill, North Carolina, USA. <sup>118</sup>Diabetes and Obesity Research Institute, Cedars-Sinai Medical Center, Los Angeles, California, USA. <sup>119</sup>Red RECAVA Grupo RD06/0014/0015, Hospital Universitario La Paz, Madrid, Spain. <sup>120</sup>Centre for Vascular Prevention, Danube-University Krems, Krems, Austria. <sup>121</sup>Division of Endocrinology and Diabetes, Department of Internal Medicine, University Medical Centre Ulm, Ulm, Germany. <sup>122</sup>Genomic Medicine, Imperial College London, Hammersmith Hospital, London, UK. <sup>123</sup>Department of Pharmacological Sciences, University of Milan, Milan, Italy. <sup>124</sup>Institute of Cardiovascular Science, University College London, London, UK. <sup>125</sup>Center for Non Communicable Diseases Pakistan, Karachi, Pakistan. <sup>126</sup>Clinic of Cardiology, West German Heart Centre, University Hospital of Essen, University Duisburg-Essen, Essen, Germany. <sup>127</sup>Hannover Unified Biobank, Hannover Medical School, Hannover, Germany. <sup>128</sup>Department of Statistics, University of Oxford, Oxford, UK. <sup>129</sup>Diabetes Genetics, Institute of Biomedical and Clinical Science, Peninsula Medical School, University of Exeter, Exeter, UK. <sup>130</sup>Human Genetics Center, University of Texas Health Science Center at Houston, Houston, Texas, USA. <sup>131</sup>Human Genome Sequencing Center at Baylor College of Medicine, Houston, Texas, USA. <sup>132</sup>Cardiovascular Research Center, Massachusetts General Hospital, Boston, Massachusetts, USA. <sup>133</sup>Division of Epidemiology and Community Health, University of Minnesota, Minneapolis, Minnesota, USA. <sup>134</sup>General Medicine Division, Massachusetts General Hospital, Boston, Massachusetts, USA. <sup>135</sup>Department of Genetics, Harvard Medical School, Boston, Massachusetts, USA. <sup>136</sup>Department of Molecular Biology, Harvard Medical School, Boston, Massachusetts, USA. <sup>137</sup>Diabetes Unit, Massachusetts General Hospital, Boston, Massachusetts, USA. <sup>138</sup>Deceased.

## Membership of the Asian Genetic Epidemiology Network Type 2 Diabetes (AGEN-T2D) Consortium

As at publication of the East Asian ancestry meta-analysis, December 2011

Yoon Shin Cho<sup>1</sup>, Chien-Hsiun Chen<sup>2,3</sup>, Cheng Hu<sup>4</sup>, Jirong Long<sup>5</sup>, Rick Twee Hee Ong<sup>6</sup>, Xueling Sim<sup>7</sup>, Fumihiko Takeuchi<sup>8</sup>, Ying Wu<sup>9</sup>, Min Jin Go<sup>1</sup>, Toshimasa Yamauchi<sup>10</sup>, Yi-Cheng Chang<sup>11</sup>, Soo Heon Kwak<sup>12</sup>, Ronald C W Ma<sup>13</sup>, Ken Yamamoto<sup>14</sup>, Linda S Adair<sup>15</sup>, Tin Aung<sup>16,17</sup>, Qiuyin Cai<sup>5</sup>, Li-Ching Chang<sup>2</sup>, Yuan-Tsong Chen<sup>2</sup>, Yutang Gao<sup>18</sup>, Frank B Hu<sup>19</sup>, Hyung-Lae Kim<sup>1,20</sup>, Sangsoo Kim<sup>21</sup>, Young Jin Kim<sup>1</sup>, Jeannette Jen-Mai Lee<sup>22</sup>, Nanette R Lee<sup>23</sup>, Yun Li<sup>9,24</sup>, Jian Jun Liu<sup>25</sup>, Wei Lu<sup>26</sup>, Jiro Nakamura<sup>27</sup>, Eitaro Nakashima<sup>27,28</sup>, Daniel Peng-Keat Ng<sup>22</sup>, Wan Ting Tay<sup>16</sup>, Fuu-Jen Tsai<sup>3</sup>, Tien Yin Wong<sup>16,17,29</sup>, Mitsuhiro Yokota<sup>30</sup>, Wei Zheng<sup>5</sup>, Rong Zhang<sup>4</sup>, Congrong Wang<sup>4</sup>, Wing Yee So<sup>13</sup>, Keizo Ohnaka<sup>31</sup>, Hiroshi Ikegami<sup>32</sup>, Kazuo Hara<sup>10</sup>, Young Min Cho<sup>12</sup>, Nam H Cho<sup>33</sup>, Tien-Jyun Chang<sup>11</sup>, Yuqian Bao<sup>4</sup>, Åsa K Hedman<sup>34</sup>, Andrew P Morris<sup>34</sup>, Mark I McCarthy<sup>34,35</sup>, Ryoichi Takayanagi<sup>36</sup>, Kyong Soo Park<sup>12,37</sup>, Weiping Jia<sup>4</sup>, Lee-Ming Chuang<sup>11,38</sup>, Juliana C N Chan<sup>13</sup>, Shiro Maeda<sup>39</sup>, Takashi Kadowaki<sup>10</sup>, Jong-Young Lee<sup>1</sup>, Jer-Yuarn Wu<sup>2,3</sup>, Yik Ying Teo<sup>6,7,22,25,40</sup>, E Shyong Tai<sup>22,41,42</sup>, Xiao Ou Shu<sup>5</sup>, Karen L Mohlke<sup>9</sup>, Norihiro Kato<sup>8</sup>, Bok-Ghee Han<sup>1</sup>, and Mark Seielstad<sup>25,43,44</sup>

<sup>1</sup>Center for Genome Science, National Institute of Health, Osong Health Technology Administration Complex, Chungcheongbuk-do, Cheongwon-gun, Gangoe-myeon, Yeonje-ri, Korea. <sup>2</sup>Institute of Biomedical Sciences, Academia Sinica, Nankang, Taipei, Taiwan. <sup>3</sup>School of Chinese Medicine, China Medical University, Taichung, Taiwan. <sup>4</sup>Shanghai Diabetes Institute, Shanghai Key Laboratory of Diabetes Mellitus, Department of Endocrinology and Metabolism, Shanghai Jiao Tong University Affiliated Sixth People's Hospital, Shanghai, China. <sup>5</sup>Department of Medicine, Vanderbilt Epidemiology Center, Vanderbilt-Ingram Cancer Center, Vanderbilt University School of Medicine, Nashville, Tennessee, USA. <sup>6</sup>Graduate School for Integrative Science and Engineering, National University of Singapore, Singapore, Singapore. <sup>7</sup>Centre for Molecular Epidemiology, National University of Singapore, Singapore, Singapore. <sup>8</sup>Research Institute, National Center for Global Health and Medicine, Shinjuku-ku, Tokyo, Japan. <sup>9</sup>Department of Genetics, University of North Carolina, Chapel Hill, North Carolina, USA. <sup>10</sup>Department of Diabetes and Metabolic Diseases, Graduate School of Medicine, The University of Tokyo, Tokyo, Japan. <sup>11</sup>Department of Internal Medicine, National Taiwan University Hospital, Taipei, Taiwan. <sup>12</sup>Department of Internal Medicine, Seoul National University College of Medicine, Seoul, Korea. <sup>13</sup>Department of Medicine and Therapeutics, Chinese University of Hong Kong, Prince of Wales Hospital, Hong Kong, China. <sup>14</sup>Division of Genome Analysis, Research Center for Genetic Information, Medical Institute of Bioregulation, Kyushu University, Higashi-ku, Fukuoka, Japan. <sup>15</sup>Department of Nutrition, University of North Carolina, Chapel Hill, North Carolina, USA. <sup>16</sup>Singapore Eye Research Institute, Singapore National Eye Centre, Singapore, Singapore. <sup>17</sup>Department of Ophthalmology, National University of Singapore, Singapore, Singapore. <sup>18</sup>Department of Epidemiology, Shanghai Cancer Institute, Shanghai, China. <sup>19</sup>Department of Nutrition and Epidemiology, Harvard School of Public Health, Boston, Massachusetts, USA. <sup>20</sup>Department of Biochemistry, School of Medicine, Ewha Womans University, Seoul, Korea. <sup>21</sup>School of Systems Biomedical Science, Soongsil University, Dongjak-gu, Seoul, Korea. <sup>22</sup>Department of Epidemiology and Public Health, National University of Singapore, Singapore, Singapore. <sup>23</sup>Office of Population Studies Foundation Inc., University of San Carlos, Cebu City, Philippines. <sup>24</sup>Department of Biostatistics, University of North Carolina, Chapel Hill, North Carolina, USA. <sup>25</sup>Genome Institute of Singapore, Agency for Science, Technology and Research, Singapore, Singapore. <sup>26</sup>Shanghai Institute of Preventive Medicine, Shanghai, China. <sup>27</sup>Division of Endocrinology and Diabetes, Department of Internal Medicine, Nagoya University Graduate School of Medicine, Nagoya, Japan. <sup>28</sup>Department of Diabetes and Endocrinology, Chubu Rosai Hospital, Nagoya, Japan. <sup>29</sup>Centre for Eye Research Australia, University of Melbourne, East Melbourne, Victoria, Australia. <sup>30</sup>Department of Genome Science, Aichi-Gakuin University, School of Dentistry, Nagoya, Japan. <sup>31</sup>Department of Geriatric Medicine, Graduate School of Medical Sciences, Kyushu University, Higashi-ku, Fukuoka, Japan. <sup>32</sup>Department of Endocrinology, Metabolism and Diabetes, Kinki University School of Medicine, Osaka-sayama, Osaka, Japan. <sup>33</sup>Department of Preventive Medicine, Ajou University School of Medicine, Suwon, Korea. <sup>34</sup>Wellcome Trust Centre for Human Genetics, University of Oxford, Oxford, UK. <sup>35</sup>Oxford Centre for Diabetes,

Endocrinology and Metabolism, University of Oxford, Churchill Hospital, Oxford, UK. <sup>36</sup>Department of Internal Medicine and Bioregulatory Science, Graduate School of Medical Sciences, Kyushu University, Higashi-ku, Fukuoka, Japan. <sup>37</sup>World Class University program, Department of Molecular Medicine and Biopharmaceutical Sciences, Graduate School of Convergence Science and Technology and College of Medicine, Seoul National University, Seoul, Korea. <sup>38</sup>Graduate Institute of Clinical Medicine, National Taiwan University School of Medicine, Taipei, Taiwan. <sup>39</sup>Laboratory for Endocrinology and Metabolism, RIKEN Center for Genomic Medicine, Yokohama, Japan. <sup>40</sup>Department of Statistics and Applied Probability, National University of Singapore, Singapore, Singapore. <sup>41</sup>Department of Medicine, National University of Singapore, Singapore, Singapore. <sup>42</sup>Duke-National University of Singapore Graduate Medical School, Singapore, Singapore. <sup>43</sup>Institute for Human Genetics, University of California, San Francisco, California, USA. <sup>44</sup>Blood Systems Research Institute, San Francisco, California, USA.



## Membership of the South Asian Type 2 Diabetes (SAT2D) Consortium

As at publication of the South Asian ancestry meta-analysis, August 2011

Jaspal S Kooner<sup>1-3</sup>, Danish Saleheen<sup>4,5</sup>, Xueling Sim<sup>6</sup>, Joban Sehmi<sup>1,2</sup>, Weihua Zhang<sup>7</sup>, Philippe Frossard<sup>4</sup>, Latonya F Been<sup>8</sup>, Kee-Seng Chia<sup>6,9</sup>, Antigone S Dimas<sup>10,11</sup>, Neelam Hassanali<sup>12</sup>, Tazeen Jafar<sup>13,14</sup>, Jeremy B M Jowett<sup>15</sup>, Xinzhong Li<sup>1</sup>, Venkatesan Radha<sup>16</sup>, Simon D Rees<sup>17,18</sup>, Fumihiko Takeuchi<sup>19</sup>, Robin Young<sup>5</sup>, Tin Aung<sup>20,21</sup>, Abdul Basit<sup>22</sup>, Manickam Chidambaram<sup>16</sup>, Debashish Das<sup>2</sup>, Elin Grundberg<sup>23</sup>, Åsa K Hedman<sup>11</sup>, Zafar I Hydrie<sup>22</sup>, Muhammed Islam<sup>13</sup>, Chiea-Chuen Khor<sup>6,21,24</sup>, Sudhir Kowlessur<sup>25</sup>, Malene M Kristensen<sup>15</sup>, Samuel Liju<sup>16</sup>, Wei-Yen Lim<sup>6</sup>, David R Matthews<sup>12</sup>, Jianjun Liu<sup>24</sup>, Andrew P Morris<sup>11</sup>, Alexandra C Nica<sup>10</sup>, Janani M Pinidiyapathirage<sup>26</sup>, Inga Prokopenko<sup>11</sup>, Asif Rasheed<sup>4</sup>, Maria Samuel<sup>4</sup>, Nabi Shah<sup>4</sup>, A Samad Shera<sup>27</sup>, Kerrin S Small<sup>23,28</sup>, Chen Suo<sup>6</sup>, Ananda R Wickremasinghe<sup>26</sup>, Tien Yin Wong<sup>20,21,29</sup>, Mingyu Yang<sup>30</sup>, Fan Zhang<sup>30</sup>, Goncalo R Abecasis<sup>31</sup>, Anthony H Barnett<sup>17,18</sup>, Mark Caulfield<sup>32</sup>, Panos Deloukas<sup>33</sup>, Timothy M Frayling<sup>34</sup>, Philippe Froguel<sup>35</sup>, Norihiro Kato<sup>19</sup>, Prasad Katulanda<sup>12,36</sup>, M Ann Kelly<sup>17,18</sup>, Junbin Liang<sup>30</sup>, Viswanathan Mohan<sup>16,37</sup>, Dharambir K Sanghera<sup>8</sup>, James Scott<sup>1</sup>, Mark Seielstad<sup>38</sup>, Paul Z Zimmet<sup>15</sup>, Paul Elliott<sup>7,39</sup>, Yik Ying Teo<sup>6,9,24,40,41</sup>, Mark I McCarthy<sup>11,12,42</sup>, John Danesh<sup>5</sup>, E Shyong Tai<sup>9,43,44</sup>, and John C Chambers<sup>2,3,7</sup>

<sup>1</sup>National Heart and Lung Institute (NHLI), Imperial College London, Hammersmith Hospital, London, UK.

<sup>2</sup>Ealing Hospital National Health Service (NHS) Trust, Middlesex, UK. <sup>3</sup>Imperial College Healthcare NHS Trust, London, UK. <sup>4</sup>Center for Non-Communicable Diseases Pakistan, Karachi, Pakistan. <sup>5</sup>Department of Public Health and Primary Care, University of Cambridge, Cambridge, UK. <sup>6</sup>Centre for Molecular Epidemiology, National University of Singapore, Singapore. <sup>7</sup>Epidemiology and Biostatistics, Imperial College London, London, UK.

<sup>8</sup>Department of Pediatrics, Section of Genetics, College of Medicine, University of Oklahoma Health Sciences Center, Oklahoma City, Oklahoma, USA. <sup>9</sup>Department of Epidemiology and Public Health, National University of Singapore, Singapore. <sup>10</sup>Department of Genetic Medicine and Development, University of Geneva Medical School, Geneva, Switzerland. <sup>11</sup>Wellcome Trust Centre for Human Genetics, University of Oxford, Oxford, UK.

<sup>12</sup>Oxford Centre for Diabetes, Endocrinology & Metabolism, University of Oxford, Churchill Hospital, Oxford, UK. <sup>13</sup>Department of Community Health Sciences, Aga Khan University, Karachi, Pakistan. <sup>14</sup>Department of Medicine, Aga Khan University, Karachi, Pakistan. <sup>15</sup>Baker IDI Heart and Diabetes Institute, Melbourne, Victoria, Australia. <sup>16</sup>Department of Molecular Genetics, Madras Diabetes Research Foundation–Indian Council of Medical Research (ICMR) Advanced Centre for Genomics of Diabetes, Chennai, India. <sup>17</sup>College of Medical and Dental Sciences, University of Birmingham, Birmingham, UK. <sup>18</sup>BioMedical Research Centre, Heart of England NHS Foundation Trust, Birmingham, UK. <sup>19</sup>Department of Gene Diagnostics and Therapeutics, Research Institute, National Center for Global Health and Medicine, Tokyo, Japan. <sup>20</sup>Department of Ophthalmology, National University of Singapore, Singapore. <sup>21</sup>Singapore Eye Research Institute, Singapore National Eye Centre, Singapore. <sup>22</sup>Baqai Institute of Diabetology and Endocrinology, Karachi, Pakistan.

<sup>23</sup>Department of Twin Research and Genetic Epidemiology, King's College London, London, UK. <sup>24</sup>Genome Institute of Singapore, Agency for Science, Technology and Research, Singapore. <sup>25</sup>Ministry of Health, Port Louis, Mauritius. <sup>26</sup>Department of Public Health, Faculty of Medicine, University of Kelaniya, Ragama, Sri Lanka. <sup>27</sup>Diabetic Association Pakistan, Karachi, Pakistan. <sup>28</sup>Wellcome Trust Sanger Institute, Wellcome Trust Genome Campus, Hinxton, UK. <sup>29</sup>Center for Eye Research Australia, University of Melbourne, Melbourne, Victoria, Australia. <sup>30</sup>Beijing Genomics Institute, Shenzhen, China. <sup>31</sup>Center for Statistical Genetics, Department of Biostatistics, University of Michigan School of Public Health, Ann Arbor, Michigan, USA. <sup>32</sup>Clinical Pharmacology and Barts and the London Genome Centre, William Harvey Research Institute, Barts and the London School of Medicine, Queen Mary University of London, London, UK. <sup>33</sup>Human Genetics, Wellcome Trust Sanger Institute, Wellcome Trust Genome Campus, Hinxton, UK. <sup>34</sup>Genetics of Complex Traits, Institute of Biomedical and Clinical Science, Peninsula Medical School, University of Exeter, Exeter, UK. <sup>35</sup>Genomics of Common Diseases, School of Public Health, Imperial College London, Hammersmith Hospital, London, UK. <sup>36</sup>Diabetes Research Unit, Department of Clinical Medicine, University of Colombo, Colombo, Sri Lanka. <sup>37</sup>Dr Mohan's Diabetes Specialties Centre, Chennai, India. <sup>38</sup>Institute of Human Genetics, University of California, San Francisco,

California, USA. <sup>39</sup>Medical Research Council (MRC)-Health Protection Agency (HPA) Centre for Environment and Health, Imperial College London, London, UK. <sup>40</sup>Department of Statistics and Applied Probability, National University of Singapore, Singapore. <sup>41</sup>National University of Singapore Graduate School for Integrative Science and Engineering, National University of Singapore, Singapore. <sup>42</sup>Oxford National Institute for Health Research (NIHR) Biomedical Research Centre, Churchill Hospital, Oxford, UK. <sup>43</sup>Department of Medicine, National University of Singapore, Singapore. <sup>44</sup>Duke-National University of Singapore Graduate Medical School, Singapore.

## Membership of the Mexican American Type 2 Diabetes (MAT2D) Consortium

As at publication of the Mexican and Mexican American ancestry meta-analysis, May 2011

Jennifer E Below<sup>1</sup>, Graeme I Bell<sup>2,3</sup>, Jorge Escobedo<sup>4</sup>, S Krithika<sup>5</sup>, Jesus Kumate<sup>6</sup>, Adan Valladares-Salgado<sup>7</sup>, Nancy J Cox<sup>2,3</sup>, Miguel Cruz<sup>7</sup>, Craig L Hanis<sup>8</sup>, and Esteban J Parra<sup>5</sup>

<sup>1</sup>Department of Genome Sciences, University of Washington, Seattle, WA 98195, USA. <sup>2</sup>Department of Medicine, University of Chicago, Chicago, IL, 60637, USA. <sup>3</sup>Department of Human Genetics, University of Chicago, Chicago, IL, 60637, USA. <sup>4</sup>Unidad de Investigacion en Epidemiologia Clinica, Hospital General Regional I, Dr. Carlos MacGregor, IMSS, Mexico City, Mexico. <sup>5</sup>Department of Anthropology, University of Toronto at Mississauga, 3359 Mississauga Road North, Mississauga, ON L5L 1C6, Canada. <sup>6</sup>Fundacion IMSS, Av. Paseo de la Reforma 476, Mz. Poniente, Col. Juarez, Deleg. Cuauhtemoc, C.P. 06600, Mexico City, Mexico. <sup>7</sup>Unidad de Investigacion Medica en Bioquimica, Hospital de Especialidades, Centro Medico Nacional Siglo XXI, IMSS, Av. Cuauhtemoc 330, Col. Doctores, C.P. 06720, Mexico City, Mexico. <sup>8</sup>Human Genetics Center, University of Texas Health Science Center at Houston, P.O. Box 20186, Houston, TX 77225, USA.

## Membership of the Type 2 Diabetes Genetic Exploration by Next-generation sequencing in multi-Ethnic Samples (T2D-GENES) Consortium

As at June 2013

Gonçalo Abecasis<sup>1</sup>, Marcio Almeida<sup>2</sup>, David Altshuler<sup>3,4,5,6,7,8,9</sup>, Jennifer L Asimit<sup>10</sup>, Gil Atzmon<sup>11</sup>, Mathew Barber<sup>12</sup>, Nicola L Beer<sup>13</sup>, Graeme I Bell<sup>12,14</sup>, Jennifer Below<sup>15</sup>, Tom Blackwell<sup>1</sup>, John Blangero<sup>2</sup>, Michael Boehnke<sup>1</sup>, Donald W Bowden<sup>16,17,18,19</sup>, Noël Burt<sup>3</sup>, John Chambers<sup>20,21,22</sup>, Han Chen<sup>23</sup>, Peng Chen<sup>24</sup>, Peter S Chines<sup>25</sup>, Yoon Shin Cho<sup>26</sup>, Sungkyoung Choi<sup>27</sup>, Claire Churchhouse<sup>3</sup>, Pablo Cingolani<sup>28</sup>, Belinda K Cornes<sup>29</sup>, Nancy Cox<sup>12,14</sup>, Aaron G Day-Williams<sup>10</sup>, Ravindranath Duggirala<sup>2</sup>, Josée Dupuis<sup>23</sup>, Thomas Dyer<sup>2</sup>, Shuang Feng<sup>1</sup>, Juan Fernandez-Tajes<sup>30</sup>, Teresa Ferreira<sup>30</sup>, Tasha E Fingerlin<sup>31</sup>, Jason Flannick<sup>3,5</sup>, Jose Florez<sup>3,5,6</sup>, Pierre Fontanillas<sup>3</sup>, Timothy M Frayling<sup>32</sup>, Christian Fuchsberger<sup>1</sup>, Eric R Gamazon<sup>14</sup>, Kyle Gaulton<sup>30</sup>, Saurabh Ghosh<sup>33</sup>, Anna Gloyn<sup>13</sup>, Robert L Grossman<sup>14,34</sup>, Jason Grundstad<sup>34</sup>, Craig Hanis<sup>15</sup>, Allison Heath<sup>34</sup>, Heather Highland<sup>15</sup>, Momoko Horikoshi<sup>30</sup>, Ik-Soo Huh<sup>27</sup>, Jeroen R Huyghe<sup>1</sup>, Kamran Ikram<sup>29,35,36,37</sup>, Kathleen A Jablonski<sup>38</sup>, Goo Jun<sup>1</sup>, Norihiro Kato<sup>39</sup>, Jayoun Kim<sup>27</sup>, Young Jin Kim<sup>40</sup>, C Ryan King<sup>41</sup>, Jaspal Kooner<sup>21,22,42</sup>, Min-Seok Kwon<sup>27</sup>, Hae Kyung Im<sup>41</sup>, Markku Laakso<sup>43</sup>, Kevin Koi-Yau Lam<sup>24</sup>, Jaehoon Lee<sup>27</sup>, Jong Young Lee<sup>44</sup>, Selyeong Lee<sup>27</sup>, Sungyoung Lee<sup>27</sup>, Donna M Lehman<sup>45</sup>, Heng Li<sup>3</sup>, Cecilia M Lindgren<sup>30</sup>, Xuanyao Liu<sup>24,46</sup>, Oren E Livne<sup>12</sup>, Adam E Locke<sup>1</sup>, Anubha Mahajan<sup>30</sup>, Julian B Maller<sup>30,47</sup>, Alisa K Manning<sup>3</sup>, Taylor J Maxwell<sup>15</sup>, Alexander Mazouze<sup>48</sup>, Mark I McCarthy<sup>13,30,49</sup>, James B Meigs<sup>6,50</sup>, Byungju Min<sup>27</sup>, Karen L Mohlke<sup>51</sup>, Andrew P Morris<sup>30</sup>, Solomon Musani<sup>52</sup>, Yoshihiko Nagai<sup>48</sup>, Maggie C Y Ng<sup>16,17</sup>, Dan Nicolae<sup>12,14,53</sup>, Sohee Oh<sup>27</sup>, Nicholette Palmer<sup>16,17,18</sup>, Taesung Park<sup>27</sup>, Toni I Pollin<sup>54</sup>, Inga Prokopenko<sup>30,55</sup>, David Reich<sup>3,4</sup>, Manuel A Rivas<sup>30</sup>, Laura J Scott<sup>1</sup>, Mark Seielstad<sup>56</sup>, Xueling Sim<sup>1</sup>, Robert Sladek<sup>48,57</sup>, Philip Smith<sup>58</sup>, Ioanna Tachmazidou<sup>10</sup>, E Shyong Tai<sup>24,35,59</sup>, Yik Ying Teo<sup>60,61,62,63,64</sup>, Tanya M Teslovich<sup>1</sup>, Jason Torres<sup>12,14</sup>, Vasily Trubetsky<sup>12,14</sup>, Sara M Willems<sup>65</sup>, Amy L Williams<sup>3,4</sup>, James G Wilson<sup>66</sup>, Steven Wiltshire<sup>30,69</sup>, Sungho Won<sup>67</sup>, Andrew R Wood<sup>32</sup>, Wang Xu<sup>59</sup>, Joon Yoon<sup>27</sup>, Matthew Zawistowski<sup>1</sup>, Eleftheria Zeggini<sup>10</sup>, Weihua Zhang<sup>20</sup>, and Sebastian Zöllner<sup>1,68</sup>

<sup>1</sup>Department of Biostatistics, Center for Statistical Genetics, University of Michigan, Ann Arbor, Michigan 48109, USA. <sup>2</sup>Department of Genetics, Texas Biomedical Research Institute, San Antonio, Texas 78227, USA. <sup>3</sup>Program in Medical and Population Genetics, Broad Institute of Harvard and MIT, Cambridge, Massachusetts 02142, USA. <sup>4</sup>Department of Genetics, Harvard Medical School, Boston, Massachusetts 02115, USA. <sup>5</sup>Center for Human Genetic Research and Diabetes Research Center (Diabetes Unit), Massachusetts General Hospital, Boston 02114, Massachusetts, USA. <sup>6</sup>Department of Medicine, Harvard Medical School, Boston, Massachusetts 02115, USA. <sup>7</sup>Center for Human Genetic Research, Massachusetts General Hospital, Boston, Massachusetts 02114, USA. <sup>8</sup>Department of Molecular Biology, Harvard Medical School, Boston, Massachusetts 02114, USA. <sup>9</sup>Department of Biology, Massachusetts Institute of Technology, Cambridge, Massachusetts 02139, USA. <sup>10</sup>Wellcome Trust Sanger Institute, Hinxton, Cambridge, CB10 1HH, UK. <sup>11</sup>Department of Medicine, Department of Genetics, Albert Einstein College of Medicine, Bronx, New York 10461, USA. <sup>12</sup>Department of Human Genetics, University of Chicago, Chicago, Illinois 60637, USA. <sup>13</sup>Oxford Centre for Diabetes, Endocrinology and Metabolism, University of Oxford, Oxford, OX3 7LJ, UK. <sup>14</sup>Department of Medicine, University of Chicago, Chicago, Illinois 60637, USA. <sup>15</sup>Human Genetics Center, University of Texas Health Science Center at Houston, Houston, Texas 77030, USA. <sup>16</sup>Center for Genomics and Personalized Medicine Research, Wake Forest School of Medicine, Winston-Salem, North Carolina 27157, USA. <sup>17</sup>Center for Diabetes Research, Wake Forest School of Medicine, Winston-Salem, North Carolina 27157, USA. <sup>18</sup>Department of Biochemistry, Wake Forest School of Medicine, Winston-Salem, North Carolina 27157, USA. <sup>19</sup>Internal Medicine-Endocrinology, Wake Forest School of Medicine, Winston-Salem, North Carolina 27157, USA. <sup>20</sup>Department of Epidemiology and Biostatistics, Imperial College London, London SW7 2AZ, UK. <sup>21</sup>Imperial College Healthcare NHS Trust, London W2 1NY, UK. <sup>22</sup>Ealing Hospital National Health Service (NHS) Trust, Middlesex UB1 3HW, UK. <sup>23</sup>Department of Biostatistics,

Boston University School of Public Health, Boston, Massachusetts 02115, USA. <sup>24</sup>Saw Swee Hock School of Public Health, National University of Singapore, Singapore 117597, Singapore. <sup>25</sup>National Human Genome Research Institute, National Institutes of Health, Bethesda, MD 20892, USA. <sup>26</sup>Department of Biomedical Science, Hallym University, Chuncheon, Gangwon-do, 200-702 South Korea. <sup>27</sup>Seoul National University, Seoul 110-799, South Korea. <sup>28</sup>McGill Centre for Bioinformatics, McGill University, Montréal, Quebec, H3G 0B1, Canada. <sup>29</sup>Singapore Eye Research Institute, Singapore National Eye Centre, Singapore 168751, Singapore. <sup>30</sup>Wellcome Trust Centre for Human Genetics, University of Oxford, Oxford, OX3 7BN, UK. <sup>31</sup>Department of Epidemiology, Colorado School of Public Health, Aurora, Colorado 80045, USA. <sup>32</sup>Genetics of Complex Traits, University of Exeter Medical School, Exeter, EX4 4SB, UK. <sup>33</sup>Human Genetics Unit, Indian Statistical Institute, 203 B.T. Road, Kolkata 700018, India <sup>34</sup>Institute for Genomics and Systems Biology, University of Chicago, Chicago, Illinois 60637, USA. <sup>35</sup>Duke National University of Singapore Graduate Medical School, Singapore 169857, Singapore. <sup>36</sup>Department of Ophthalmology, National University of Singapore and National University Health System, Singapore 119228, Singapore. <sup>37</sup>Department of Ophthalmology, Erasmus Medical Center, Rotterdam 3000 CA, the Netherlands. <sup>38</sup>The Biostatistics Center, George Washington University, Rockville, Maryland 20852, USA. <sup>39</sup>Department of Gene Diagnostics and Therapeutics, Research Institute, National Center for Global Health and Medicine, Tokyo 162-8655, Japan. <sup>40</sup>Department of Neurology, Konkuk University School of Medicine, Seoul 143-701, South Korea. <sup>41</sup>Department of Health Studies, University of Chicago, Chicago, Illinois 60637, USA. <sup>42</sup>National Heart and Lung Institute (NHLI), Imperial College London, Hammersmith Hospital, London W12 0HS, UK. <sup>43</sup>Department of Medicine, University of Eastern Finland, Kuopio Campus and Kuopio University Hospital, FI-70211 Kuopio, Finland. <sup>44</sup>Center for Genome Science, Korea National Institute of Health, Osong Health Technology Administration Complex, Chungcheongbuk-do, 363-951, South Korea. <sup>45</sup>Division of Clinical Epidemiology, Department of Medicine, University of Texas Health Science Center at San Antonio, San Antonio, Texas 78229, USA. <sup>46</sup>Graduate School for Integrative Science and Engineering, National University of Singapore, Singapore 117456, Singapore. <sup>47</sup>Department of Statistics, University of Oxford, Oxford, OX1 3TG, UK. <sup>48</sup>McGill University, Montréal, Québec H3A 0G4, Canada. <sup>49</sup>Oxford NIHR Biomedical Research Centre, Churchill Hospital, Headington, OX3 7LE, UK. <sup>50</sup>General Medicine Division, Massachusetts General Hospital, Boston, Massachusetts 02114, USA. <sup>51</sup>Department of Genetics, University of North Carolina-Chapel Hill, Chapel Hill, North Carolina 27599, USA. <sup>52</sup>Department of Medicine, University of Mississippi Medical Center, Jackson, Mississippi 39126, USA. <sup>53</sup>Department of Statistics, University of Chicago, Chicago, Illinois 60637, USA. <sup>54</sup>Department of Medicine, Program for Personalized and Genomic Medicine, University of Maryland School of Medicine, Baltimore, Maryland 21201, USA. <sup>55</sup>Genomics of Common Disease, Imperial College London, Hammersmith Hospital, London, W12 0NN, UK. <sup>56</sup>University of California San Francisco, San Francisco, California 94143, USA. <sup>57</sup>Department of Medicine, Royal Victoria Hospital, Montréal, Québec H3A 1A1, Canada. <sup>58</sup>National Institute of Diabetes and Digestive and Kidney Disease, National Institutes of Health, Bethesda, MD 20817, USA. <sup>59</sup>Department of Medicine, Yong Loo Lin School of Medicine, National University of Singapore, Singapore 117597, Singapore. <sup>60</sup>Department of Epidemiology and Public Health, National University of Singapore, Singapore 117597, Singapore. <sup>61</sup>Centre for Molecular Epidemiology, National University of Singapore, Singapore 117456, Singapore. <sup>62</sup>Genome Institute of Singapore, Agency for Science, Technology and Research, Singapore 138672, Singapore. <sup>63</sup>Graduate School for Integrative Science and Engineering, National University of Singapore, Singapore 117456, Singapore. <sup>64</sup>Department of Statistics and Applied Probability, National University of Singapore, Singapore 117546, Singapore. <sup>65</sup>Department of Genetic Epidemiology, Erasmus Medical Center, Rotterdam 3000 CA, the Netherlands. <sup>66</sup>Department of Physiology and Biophysics, University of Mississippi Medical Center, Jackson, Mississippi 39216, USA. <sup>67</sup>Chung-Ang University, Seoul 156-756, South Korea. <sup>68</sup>Department of Psychiatry, University of Michigan, Ann Arbor, Michigan 48109, USA. <sup>69</sup>Deceased.

## Resources interrogated for expression analyses

We interrogated public databases and unpublished resources for *cis*-eQTL expression with lead Ps in the novel susceptibility loci in multiple tissues: fresh lymphocytes<sup>1</sup>, fresh leukocytes<sup>2</sup>, leukocyte samples in individuals with Celiac disease<sup>3</sup>, lymphoblastoid cell lines (LCL) derived from asthmatic children<sup>4</sup>, HapMap LCL from 3 populations<sup>5</sup>, a separate study on HapMap CEU LCL<sup>6</sup>, CD19+ B cells<sup>7</sup>, peripheral blood monocytes<sup>7-9</sup>, dendritic cells before and after *Mycobacterium tuberculosis* infection<sup>10</sup>, omental and subcutaneous adipose<sup>11,12</sup>, stomach<sup>12</sup> and whole blood samples<sup>11,13,14</sup>, endometrial carcinomas<sup>15</sup>, brain cortex<sup>7,16,17</sup>, 3 large studies of brain regions including prefrontal cortex, visual cortex and cerebellum, (Emilsson, personal communication), liver<sup>12,18,19</sup>, osteoblasts<sup>20</sup>, lung<sup>21</sup>, skin<sup>22</sup> and additional fibroblast, T cell and LCL samples<sup>23,24</sup>.

1. Goring HH, *et al.* (2007). Discovery of expression QTLs using large-scale transcriptional profiling in human lymphocytes. *Nat Genet* 39: 1208-16.
2. Idaghdour Y, *et al.* (2010). Geographical genomics of human leukocyte gene expression variation in southern Morocco. *Nat Genet* 42: 62-7.
3. Heap GA, *et al.* (2009). Complex nature of SNP genotype effects on gene expression in primary human leucocytes. *BMC Med Genomics* 2: 1.
4. Dixon AL, *et al.* (2007). A genome-wide association study of global gene expression. *Nat Genet* 39: 1202-7.
5. Stranger BE, *et al.* (2007). Population genomics of human gene expression. *Nat Genet* 39: 1217-24.
6. Kwan T, *et al.* (2008). Genome-wide analysis of transcript isoform variation in humans. *Nat Genet* 40: 225-31.
7. Fairfax BP, *et al.* (2012). Genetics of gene expression in primary immune cells identifies cell type-specific master regulators and roles of HLA alleles. *Nat Genet* 44: 502-10.
8. Heinzen EL, *et al.* (2008). Tissue-specific genetic control of splicing: implications for the study of complex traits. *PLoS Biol* 6: e1.
9. Zeller T, *et al.* (2010). Genetics and beyond - the transcriptome of human monocytes and disease susceptibility. *PLoS One* 5: e10693.
10. Barreiro LB, *et al.* (2012). Deciphering the genetic architecture of variation in the immune response to *Mycobacterium tuberculosis* infection. *Proc Natl Acad Sci USA* 109: 1204-9.
11. Emilsson V, *et al.* (2008). Genetics of gene expression and its effect on disease. *Nature* 452: 423-8.
12. Greenawalt DM, *et al.* (2011). A survey of the genetics of stomach, liver and adipose gene expression from a morbidly obese cohort. *Genome Res* 21: 1008-16.
13. Fehrmann RS, *et al.* (2011). Trans-eQTLs reveal that independent genetic variants associated with a complex phenotype converge on intermediate genes with a major role for the HLA. *PLoS Genet* 7: e1002197.
14. Mehta D, *et al.* (2013). Impact of common regulatory single-nucleotide variants on gene expression profiles in whole blood. *Eur J Hum Genet* 21: 48- 54.
15. Kompass KS, Witte JS (2011). Co-regulatory expression quantitative trait loci mapping: method and application to endometrial cancer. *BMC Med Genomics* 4: 6.

16. Webster JA, *et al.* (2009). Genetic control of human brain transcript expression in Alzheimer disease. *Am J Hum Genet* 84: 445-58.
17. Zou F, *et al.* (2012). Brain expression genome-wide association study (eGWAS) identifies human disease-associated variants. *PLoS Genet* 8: e1002707.
18. Schadt EE, *et al.* (2008). Mapping the genetic architecture of gene expression in human liver. *PLoS Biol* 6: e107.
19. Innocenti F, *et al.* (2011). Identification, replication, and functional fine-mapping of expression quantitative trait loci in primary human liver tissue. *PLoS Genet* 7: e1002078.
20. Grundberg E, *et al.* (2009). Population genomics in a disease targeted primary cell model. *Genome Res* 19: 1942-52.
21. Hao K, *et al.* (2012). Lung eQTLs to help reveal the molecular underpinnings of asthma. *PLoS Genet* 8: e1003029.
22. Ding J, *et al.* (2010). Gene expression in skin and lymphoblastoid cells: refined statistical method reveals extensive overlap in *cis*-eQTL signals. *Am J Hum Genet* 87: 779-89.
23. Dimas AS, *et al.* (2009). Common regulatory variation impacts gene expression in a cell type-dependent manner. *Science* 325: 1246-50.
24. Cusanovich DA, *et al.* (2012). The combination of a genome-wide association study of lymphocyte count and analysis of gene expression data reveals novel asthma candidate genes. *Hum Mol Genet* 21: 2111-23
